# Supplementary material for: Shallow-water Mussels Adapt to Deep-Sea Environment Through Transcriptomic and Metagenomic Insights
Source: Research Square preprint supplement (doi:10.21203/rs.3.rs-4562993/v1), 2024-08-30
Supplement: Supplementary file 1 [file 51893ac92a8f568de56adba9.xlsx]

## Sheet: Supplementary Data 1
Supplementary Data 1 | Metadata of publicly available RNA-seq samples used in this study
Habitat	Run	BioProject	Instrument	Organism	Publication
Deep sea	ERR3600856	PRJEB34925	Illumina NovaSeq 6000	Bathymodiolus azoricus	10.1038/s41467-020-17284-4
	ERR3600859	PRJEB34925	Illumina NovaSeq 6000	Bathymodiolus azoricus	10.1038/s41467-020-17284-4
	ERR3600860	PRJEB34925	Illumina NovaSeq 6000	Bathymodiolus azoricus	10.1038/s41467-020-17284-4
	SRR5164454	PRJNA360359	Illumina HiSeq 2500	Bathymodiolus manusensis	10.1111/mec.14160
	SRR5164455	PRJNA360359	Illumina HiSeq 2500	Bathymodiolus manusensis	10.1111/mec.14160
	SRR5168014	PRJNA360359	Illumina HiSeq 2500	Bathymodiolus manusensis	10.1111/mec.14160
	SRR5164456	PRJNA360359	Illumina HiSeq 2500	Gigantidas platifrons	10.1111/mec.14160
	SRR5164457	PRJNA360359	Illumina HiSeq 2500	Gigantidas platifrons	10.1111/mec.14160
	SRR5164458	PRJNA360359	Illumina HiSeq 2500	Gigantidas platifrons	10.1111/mec.14160
Shallow water	SRR18682404	PRJNA824625	Illumina HiSeq 2500	Mytilus galloprovincialis	10.21203/rs.3.rs-1536907/v1
	SRR18682405	PRJNA824625	Illumina HiSeq 2500	Mytilus galloprovincialis	10.21203/rs.3.rs-1536907/v1
	SRR18682412	PRJNA824625	Illumina HiSeq 2500	Mytilus galloprovincialis	10.21203/rs.3.rs-1536907/v1
	SRR16293785	PRJNA770460	Illumina NovaSeq 6000	Mytilus coruscus	10.3389/fmars.2022.1014336
	SRR16293786	PRJNA770460	Illumina NovaSeq 6000	Mytilus coruscus	10.3389/fmars.2022.1014336
	SRR16293787	PRJNA770460	Illumina NovaSeq 6000	Mytilus coruscus	10.3389/fmars.2022.1014336
	SRR1503507	PRJNA254094	Illumina Genome Analyzer IIx	Perna viridis	10.1186/1471-2164-15-804
	SRR1503508	PRJNA254094	Illumina Genome Analyzer IIx	Perna viridis	10.1186/1471-2164-15-804

## Sheet: Supplementary Data 2
Supplementary Data 2 | Positively selected genes informations
OGs	lnL0	lnL1	np0	np1	kappa	pvalue	Unigenes id	NR annotation	WGCNA module	log2FoldChange(Deep vs Shallow)*	log2FoldChange(LP vs Con)*
OG0013273	-2214.69	-2210.65	16	17	1.4145	0.00444948	TRINITY_DN8300_c0_g1_i9	VDH97988.1 NADH dehydrogenase [ubiquinone] 1 alpha subcomplex assembly factor 5 [Mytilus galloprovincialis]	blue	0.35673	0.517114
OG0012172	-1464.47	-1462.41	16	17	1.01343	0.0422004	TRINITY_DN8423_c0_g1_i21	CAG2221216.1 ETHE1 [Mytilus edulis]	blue	2.46993	2.13774
OG0013406	-1806.85	-1801.96	16	17	1.9016	0.00176642	TRINITY_DN37312_c0_g1_i1	VDI81627.1 small subunit ribosomal protein S34 [Mytilus galloprovincialis]	blue	0.607927	0.459677
OG0013999	-1058.97	-1078.6	16	17	0.9834	3.69303e-10	TRINITY_DN159228_c0_g2_i1	VDI59001.1 large subunit ribosomal protein L27Ae [Mytilus galloprovincialis]	blue	14.9574	17.5029
* log2FoldChange of PSGs were calculated by all SCOGs expressions through differentially expressed analysis

## Sheet: Supplementary Data 3
Supplementary Data 3 | Metadata of publicly available shotgun metagenomic samples used in this study
SampleID	Run	BioProject	Instrument	Environment	Description	DOI
Seawater-1	SRR13892591	PRJNA707313	Illumina HiSeq X Ten	Seawater	Fluid under the invertebrate communities	10.1038/s41597-022-01586-x
Seawater-2	SRR13892595	PRJNA707313	Illumina HiSeq X Ten	Seawater	Cold seep fluids at gas plume	10.1038/s41597-022-01586-x
Seawater-3	SRR13892606	PRJNA707313	Illumina HiSeq X Ten	Seawater	Water closely above the invertebrate communities_2	10.1038/s41597-022-01586-x
Seawater-4	SRR13892607	PRJNA707313	Illumina HiSeq X Ten	Seawater	Water closely above the invertebrate communities_1	10.1038/s41597-022-01586-x
Sediment-1	SRR11306546	PRJNA612576	Illumina HiSeq 2500	Surface sediment	Methane cold seep marine sediment 0-0.02 cmbsf	10.1016/j.marpolbul.2022.113458
Sediment-2	SRR13892590	PRJNA707313	Illumina HiSeq X Ten	Surface sediment	Sediment (0-2 cmbsf)	10.1038/s41597-022-01586-x
Sediment-3	SRR19020598	PRJNA831433	Illumina NovaSeq 6000	Surface sediment	Methane cold seep marine sediment 0-0.04 cmbsf	10.1038/s41467-023-36877-3
DMSG-1	Non public	PRJNA891060	Illumina HiSeq X Ten	Deep-sea mussel gill	Methane cold seep mussel gill	10.1186/s40168-023-01695-8
DMSG-2	Non public	PRJNA891060	Illumina HiSeq X Ten	Deep-sea mussel gill	Methane cold seep mussel gill	10.1186/s40168-023-01695-9
DMSG-3	Non public	PRJNA891060	Illumina HiSeq X Ten	Deep-sea mussel gill	Methane cold seep mussel gill	10.1186/s40168-023-01695-10
DMSG-4	Non public	PRJNA891060	Illumina HiSeq X Ten	Deep-sea mussel gill	Methane cold seep mussel gill	10.1186/s40168-023-01695-11
DMSG-5	Non public	PRJNA891060	Illumina HiSeq X Ten	Deep-sea mussel gill	Methane cold seep mussel gill	10.1186/s40168-023-01695-12
DMSG-6	Non public	PRJNA891060	Illumina HiSeq X Ten	Deep-sea mussel gill	Methane cold seep mussel gill	10.1186/s40168-023-01695-13
DMSG-7	Non public	PRJNA891060	Illumina HiSeq X Ten	Deep-sea mussel gill	Methane cold seep mussel gill	10.1186/s40168-023-01695-14
DMSG-8	Non public	PRJNA891060	Illumina HiSeq X Ten	Deep-sea mussel gill	Methane cold seep mussel gill	10.1186/s40168-023-01695-15
DMSG-9	Non public	PRJNA891060	Illumina HiSeq X Ten	Deep-sea mussel gill	Methane cold seep mussel gill	10.1186/s40168-023-01695-16
DMSG-10	Non public	PRJNA891060	Illumina HiSeq X Ten	Deep-sea mussel gill	Methane cold seep mussel gill	10.1186/s40168-023-01695-17
DMSG-11	Non public	PRJNA891060	Illumina HiSeq X Ten	Deep-sea mussel gill	Methane cold seep mussel gill	10.1186/s40168-023-01695-18

## Sheet: Supplementary Data 4
Supplementary Data 4 | Pearson correlation coefficients of each gene with the abundance of Bathymodiolus platifrons methanotrophic gill symbiont
GeneID	Pearson correlation coefficient	p-value	NCBI Non-Redundant Proteins (NR) annotation
TRINITY_DN328022_c0_g1_i1	0.991219	2.57376e-08	CAC5402160.1 DDX5 [Mytilus coruscus]
TRINITY_DN127366_c0_g1_i1	0.988045	8.80977e-08	AAP97079.1 beta tubulin, partial [Crassostrea gigas]
TRINITY_DN341622_c0_g1_i1	0.984996	2.17748e-07	CAC5383936.1 RP-L13e [Mytilus coruscus]
TRINITY_DN386023_c0_g1_i1	0.983733	3.00439e-07	QUP51989.1 IRP-2 [Urechis unicinctus]
TRINITY_DN389727_c0_g1_i1	0.983636	3.0761e-07	VDI37998.1 heterogeneous nuclear ribonucleoprotein R [Mytilus galloprovincialis]
TRINITY_DN51723_c1_g1_i1	0.979814	7.09006e-07	CAC5406167.1 Translin [Mytilus coruscus]
TRINITY_DN88467_c0_g1_i1	0.979481	7.56631e-07	CAC5414926.1 ATPeF1B [Mytilus coruscus]
TRINITY_DN206279_c0_g1_i1	0.978223	9.58452e-07	XP_031363101.1 tubulin alpha chain [Lonchura striata domestica]
TRINITY_DN217168_c0_g1_i1	0.974453	1.8071e-06	VDI13973.1 large subunit ribosomal protein L3e [Mytilus galloprovincialis]
TRINITY_DN74907_c0_g1_i1	0.973228	2.17618e-06	CAC5412828.1 RP-L12e [Mytilus coruscus]
TRINITY_DN35770_c0_g1_i2	0.969686	3.56172e-06	CAG2187618.1 E3.3.1.1 [Mytilus edulis]
TRINITY_DN27728_c1_g1_i1	0.967701	4.57951e-06	CAG2233963.1 PABPC [Mytilus edulis]
TRINITY_DN193555_c0_g2_i2	0.967552	4.66358e-06	AAM94276.1 ribosomal protein L44 [Azumapecten farreri]
TRINITY_DN313089_c0_g1_i1	0.967437	4.72939e-06	WP_150929320.1 cytochrome c family protein [Acinetobacter baumannii]
TRINITY_DN56101_c1_g2_i1	0.966452	5.32146e-06	BAS29643.1 heat shock cognate 70 [Mytilisepta virgata]
TRINITY_DN143296_c2_g1_i1	0.96548	5.95852e-06	VDH94476.1 small subunit ribosomal protein S20e [Mytilus galloprovincialis]
TRINITY_DN201842_c0_g1_i1	0.962369	8.38327e-06	VDI28511.1 tumor necrosis factor ligand superfamily member 10 [Mytilus galloprovincialis]
TRINITY_DN42830_c0_g1_i30	0.961475	9.19846e-06	CAG2238071.1 CIT [Mytilus edulis]
TRINITY_DN63247_c3_g1_i1	0.959486	1.12231e-05	OPL21695.1 serine 2 threonine-protein phosphatase with ef-hands, partial [Mytilus galloprovincialis]
TRINITY_DN298152_c0_g1_i1	0.959371	1.13503e-05	VDI34797.1 cytochrome P450, family 2, subfamily J [Mytilus galloprovincialis]
TRINITY_DN104191_c0_g1_i1	0.958661	1.21537e-05	CAC5402333.1 PDIA1 [Mytilus coruscus]
TRINITY_DN317301_c0_g1_i1	0.957698	1.33104e-05	CAG2195569.1 GM2A [Mytilus edulis]
TRINITY_DN56651_c1_g3_i1	0.957613	1.34167e-05	CAC5394428.1 RP-L10e [Mytilus coruscus]
TRINITY_DN28388_c0_g1_i1	0.956381	1.50229e-05	CAC5382116.1 RP-S18e [Mytilus coruscus]
TRINITY_DN335751_c0_g1_i1	0.954038	1.84685e-05	VDI81122.1 3-phosphoinositide dependent protein kinase-1 [Mytilus galloprovincialis]
TRINITY_DN86387_c2_g1_i1	0.953969	1.85773e-05	CAC5373268.1 RP-L18e [Mytilus coruscus]
TRINITY_DN392660_c0_g1_i1	0.953239	1.9766e-05	UDE22416.1 cathepsin B [Mytilus galloprovincialis]
TRINITY_DN73021_c0_g1_i1	0.947324	3.16018e-05	CAG2222219.1 EST2 [Mytilus edulis]
TRINITY_DN16039_c0_g1_i1	0.944938	3.76189e-05	CAC5383798.1 RACK1 [Mytilus coruscus]
TRINITY_DN334314_c0_g1_i1	0.943373	4.19994e-05	CAC5393478.1 MAP3K8 [Mytilus coruscus]
TRINITY_DN156724_c0_g2_i1	0.942512	4.45663e-05	CAG2201312.1 NR2E3 [Mytilus edulis]
TRINITY_DN348325_c0_g1_i1	0.942321	4.5151e-05	CAG2231387.1 SOSS complex subunit B2,SOSS complex subunit B1,SOSS complex subunit B1-A,SOSS complex subunit B1-B,SOSS complex subunit B homolog [Mytilus edulis]
TRINITY_DN40415_c3_g1_i1	0.942137	4.57184e-05	CAC5393666.1 TUBA [Mytilus coruscus]
TRINITY_DN69198_c0_g1_i1	0.940889	4.97184e-05	CAC5422202.1 RP-L13Ae [Mytilus coruscus]
TRINITY_DN183_c0_g1_i3	0.938688	5.73918e-05	CAG2211751.1 PC [Mytilus edulis]
TRINITY_DN277891_c0_g1_i1	0.937773	6.08255e-05	VDI13507.1 obscurin-RhoGEF [Mytilus galloprovincialis]
TRINITY_DN20916_c0_g1_i1	0.936675	6.51452e-05	CAC5379199.1 RP-LP0 [Mytilus coruscus]
TRINITY_DN63393_c0_g1_i1	0.936557	6.56218e-05	CAG2241650.1 CALM [Mytilus edulis]
TRINITY_DN80452_c0_g1_i1	0.935504	6.99986e-05	AKS48144.1 arginine kinase-like protein-1 [Mytilus coruscus]
TRINITY_DN4008_c0_g1_i4	0.934976	7.22736e-05	CAC5413040.1 ARPC4 [Mytilus coruscus]
TRINITY_DN44289_c0_g1_i6	0.934126	7.60464e-05	CAC5388356.1 PML [Mytilus coruscus]
TRINITY_DN9325_c0_g1_i5	0.934083	7.62415e-05	VDI04305.1 ceramide kinase [Mytilus galloprovincialis]
TRINITY_DN57286_c1_g1_i1	0.933995	7.6643e-05	ADI82826.1 beta-tubulin, partial [Chilodonella uncinata]
TRINITY_DN89421_c0_g1_i5	0.933262	8.0031e-05	CAG2238308.1 KLIP1 [Mytilus edulis]
TRINITY_DN68195_c0_g1_i1	0.932602	8.3178e-05	XP_046357633.1 60S ribosomal protein L23 [Haliotis rufescens]
TRINITY_DN95825_c0_g2_i3	0.931812	8.70595e-05	CAG2230307.1 Protein NipSnap homolog 1,Protein NipSnap homolog 2,Protein NipSnap [Mytilus edulis]
TRINITY_DN6031_c0_g1_i1	0.931286	8.97212e-05	WP_235166119.1 ferritin [Escherichia coli]
TRINITY_DN71358_c0_g2_i1	0.930712	9.26909e-05	WP_139476202.1 reverse transcriptase family protein, partial [Bathymodiolus brooksi thiotrophic gill symbiont]
TRINITY_DN289330_c0_g1_i1	0.930444	9.4102e-05	XP_004362235.1 S60 ribosomal protein L10 [Cavenderia fasciculata]
TRINITY_DN199345_c0_g1_i1	0.93042	9.42289e-05	QJW70237.1 putative NHP2-like protein 1 [Mytilus trossulus]
TRINITY_DN148822_c0_g1_i1	0.930417	9.42455e-05	VDI14830.1 MFS transporter, OCT family, solute carrier family 22 (organic cation transporter), member 4/5 [Mytilus galloprovincialis]
TRINITY_DN264258_c0_g1_i1	0.930373	9.44778e-05	APR72375.1 histone H2A.Z.2 [Mytilus galloprovincialis]
TRINITY_DN120347_c0_g3_i1	0.930315	9.47872e-05	XP_018431538.1 PREDICTED: tubulin beta chain-like, partial [Nanorana parkeri]
TRINITY_DN374947_c0_g1_i1	0.930304	9.48446e-05	CAC5398513.1 HARBI1 [Mytilus coruscus]
TRINITY_DN359397_c0_g1_i1	0.9303	9.48656e-05	CAC5381660.1 MTMR14 [Mytilus coruscus]
TRINITY_DN248551_c1_g1_i1	0.930259	9.50862e-05	XP_011438308.1 40S ribosomal protein S3 [Crassostrea gigas]
TRINITY_DN19962_c0_g1_i2	0.930131	9.57695e-05	CAG2241037.1 COL8A [Mytilus edulis]
TRINITY_DN356909_c0_g1_i1	0.930014	9.64006e-05	CAG2186167.1 EIF5A [Mytilus edulis]
TRINITY_DN281897_c0_g1_i1	0.930013	9.64056e-05	CAC5380943.1 MAM domain-containing glycosylphosphatidylinositol anchor protein 1,MAM and LDL-receptor class A domain-containing protein 1,MAM and LDL-receptor class A domain-containing protein 2,MAM domain-containing glycosylphosphatidylinositol anchor protein 2 [Mytilus coruscus]
TRINITY_DN6_c19_g1_i3	0.929625	9.8511e-05	CAC5388356.1 PML [Mytilus coruscus]
TRINITY_DN41017_c0_g1_i1	0.928721	0.000103559	CAC5383057.1 LRP4 [Mytilus coruscus]
TRINITY_DN159719_c0_g2_i1	0.928236	0.00010634	OPL21635.1 78 protein kda glucose-regulated, partial [Mytilus galloprovincialis]
TRINITY_DN367626_c0_g1_i1	0.927948	0.000108021	CAC5401799.1 HMCN [Mytilus coruscus]
TRINITY_DN112688_c0_g1_i1	0.92619	0.000118698	ALX27203.1 ribosomal protein S8e, partial [Mytilus trossulus]
TRINITY_DN17518_c0_g1_i1	0.926019	0.000119779	WP_235165926.1 GTP-binding protein, partial [Escherichia coli]
TRINITY_DN63535_c0_g1_i1	0.924976	0.000126515	VDI56987.1 phenylalanine-4-hydroxylase [Mytilus galloprovincialis]
TRINITY_DN370230_c0_g1_i1	0.924764	0.000127915	VDI34722.1 small subunit ribosomal protein S14e [Mytilus galloprovincialis]
TRINITY_DN389795_c0_g1_i1	0.924756	0.00012797	CAC5406899.1 ERV29 [Mytilus coruscus]
TRINITY_DN335544_c0_g1_i1	0.923418	0.000137087	VDI79802.1 mitochondrial import receptor subunit TOM7 [Mytilus galloprovincialis]
TRINITY_DN86482_c0_g1_i5	0.922016	0.000147156	CAC5399298.1 Putative ankyrin repeat protein L93 [Mytilus coruscus]
TRINITY_DN182222_c0_g1_i1	0.921905	0.000147969	XP_021344721.1 ATP-binding cassette sub-family D member 3-like [Mizuhopecten yessoensis]
TRINITY_DN22804_c0_g1_i9	0.921156	0.000153587	CAG2194245.1 Hemicentin-1,Coadhesin,Adhesion G protein-coupled receptor B3,Thrombospondin-2,Thrombospondin-1,Mucin-like protein [Mytilus edulis]
TRINITY_DN1718_c0_g2_i1	0.920992	0.000154839	CAG2235791.1 REEP5_6 [Mytilus edulis]
TRINITY_DN374043_c0_g1_i1	0.920008	0.000162497	MBV98735.1 Iron-sulfur cluster assembly enzyme ISCU, mitochondrial [Eschrichtius robustus]
TRINITY_DN157081_c1_g1_i1	0.919105	0.000169777	CAG2251305.1 RP-L7Ae [Mytilus edulis]
TRINITY_DN305392_c0_g1_i1	0.919071	0.000170048	CAG2255885.1 STAF42 [Mytilus edulis]
TRINITY_DN382228_c0_g1_i1	0.918651	0.00017352	VDI50995.1 sacsin [Mytilus galloprovincialis]
TRINITY_DN368453_c0_g1_i1	0.918317	0.000176318	CAC5423811.1 NASP [Mytilus coruscus]
TRINITY_DN33163_c0_g1_i3	0.918112	0.000178049	CAG2239710.1 KRAB [Mytilus edulis]
TRINITY_DN995_c2_g1_i19	0.917419	0.000183993	CAG2231923.1 ETV1 [Mytilus edulis]
TRINITY_DN57937_c0_g1_i1	0.91722	0.000185726	CAC5399598.1 RP-L9e [Mytilus coruscus]
TRINITY_DN157434_c0_g1_i1	0.915708	0.000199295	CAC5418587.1 ZFP36L [Mytilus coruscus]
TRINITY_DN127047_c0_g1_i2	0.914788	0.000207905	XP_042943496.1 BOI-related E3 ubiquitin-protein ligase 1 [Carya illinoinensis]
TRINITY_DN39725_c0_g1_i1	0.914479	0.000210857	CAC5420317.1 EEF2 [Mytilus coruscus]
TRINITY_DN156724_c0_g1_i1	0.914011	0.000215383	CAC5375907.1 NR2E3 [Mytilus coruscus]
TRINITY_DN367638_c0_g1_i1	0.913921	0.00021626	ABA03052.1 NA/K-ATPase alpha subunit, partial [Mytilus edulis]
TRINITY_DN344227_c0_g1_i1	0.913329	0.000222117	XP_018346335.1 PREDICTED: PI-actitoxin-Afv2b-like [Trachymyrmex septentrionalis]
TRINITY_DN51574_c0_g2_i1	0.913055	0.000224861	XP_035829070.1 flotillin-1 isoform X2 [Aplysia californica]
TRINITY_DN241246_c0_g1_i1	0.913029	0.00022512	CAG2229458.1 ARF1_2 [Mytilus edulis]
TRINITY_DN104191_c0_g2_i1	0.912964	0.000225775	CAC5402333.1 PDIA1 [Mytilus coruscus]
TRINITY_DN10363_c0_g1_i17	0.91196	0.000236078	CAC5374395.1 BIRC2_3 [Mytilus coruscus]
TRINITY_DN98127_c0_g1_i1	0.911663	0.000239199	VDI27382.1 glyceraldehyde 3-phosphate dehydrogenase [Mytilus galloprovincialis]
TRINITY_DN22888_c0_g1_i1	0.911475	0.000241177	VDI40739.1 thrombospondin 2/3/4/5 [Mytilus galloprovincialis]
TRINITY_DN9089_c0_g3_i4	0.911401	0.000241972	CAC5399767.1 GTPase IMAP family member 4,GTPase IMAP family member 7 [Mytilus coruscus]
TRINITY_DN339359_c0_g1_i1	0.91114	0.000244753	VDI35174.1 homeobox protein HoxA/B/D1 [Mytilus galloprovincialis]
TRINITY_DN38553_c0_g1_i1	0.910171	0.000255291	CAC5370390.1 RNPS1 [Mytilus coruscus]
TRINITY_DN62798_c1_g2_i1	0.90979	0.000259534	OPL20860.1 dna-binding a protein, partial [Mytilus galloprovincialis]
TRINITY_DN18773_c3_g1_i1	0.909669	0.000260893	ABX56004.1 mannose-6-phosphate isomerase, partial [Mytilus edulis]
TRINITY_DN270433_c0_g1_i1	0.908616	0.000272907	MBN3280019.1 RS2 protein [Polyodon spathula]
TRINITY_DN50099_c0_g1_i2	0.908548	0.000273706	VDH97499.1 tripartite motif-containing protein 56 [Mytilus galloprovincialis]
TRINITY_DN100895_c0_g2_i1	0.907618	0.000284678	CAG2248302.1 CD283 [Mytilus edulis]
TRINITY_DN116961_c0_g1_i1	0.906151	0.000302645	CAG2186959.1 THOP1 [Mytilus edulis]
TRINITY_DN182625_c0_g1_i1	0.906043	0.000304	VDI69512.1 mitochondrial import inner membrane translocase subunit TIM10B [Mytilus galloprovincialis]
TRINITY_DN234279_c0_g1_i1	0.90579	0.000307192	CAC5426573.1 EIF3H [Mytilus coruscus]
TRINITY_DN294222_c0_g1_i1	0.905577	0.000309891	CAG2193977.1 NPFFR2 [Mytilus edulis]
TRINITY_DN176510_c0_g1_i2	0.905052	0.000316631	CAC5423920.1 Beta-1,4-N-acetylgalactosaminyltransferase bre-4,Beta-1,4-galactosyltransferase 1,Beta-1,4-galactosyltransferase 2,Beta-1,4-galactosyltransferase 3,Beta-1,4-galactosyltransferase 6,Beta-1,4-galactosyltransferase 5,Beta-1,4-galactosyltransferase 4 [Mytilus coruscus]
TRINITY_DN111118_c2_g1_i2	0.904915	0.000318411	CAG2200815.1 CRY [Mytilus edulis]
TRINITY_DN40241_c0_g1_i1	0.904514	0.000323652	VDI54356.1 uncharacterized protein MGAL_10B062610 [Mytilus galloprovincialis]
TRINITY_DN60166_c0_g1_i17	0.904199	0.00032782	CAG2214863.1 FH1/FH2 domain-containing protein 1,FH1/FH2 domain-containing protein 3 [Mytilus edulis]
TRINITY_DN76920_c2_g1_i3	0.904187	0.000327978	OPL33122.1 insulin receptor-like, partial [Mytilus galloprovincialis]
TRINITY_DN29127_c0_g1_i12	0.902995	0.000344098	CAG2239782.1 GPR157 [Mytilus edulis]
TRINITY_DN51156_c0_g1_i1	0.90281	0.000346653	VDH89959.1 large subunit ribosomal protein L37e [Mytilus galloprovincialis]
TRINITY_DN78081_c0_g1_i1	0.902706	0.00034809	CAG2213475.1 Techylectin-5B,Ficolin-2,Fibroleukin,Fibrinogen-like protein 1,Ficolin-1,Angiopoietin-4 [Mytilus edulis]
TRINITY_DN90_c0_g2_i11	0.902193	0.00035526	VDI16642.1 male-specific lethal 3 [Mytilus galloprovincialis]
TRINITY_DN87708_c0_g1_i1	0.902045	0.000357354	CAC5380051.1 HARBI1 [Mytilus coruscus]
TRINITY_DN142122_c0_g1_i1	0.901921	0.000359116	CAC5402658.1 C1QL [Mytilus coruscus]
TRINITY_DN2212_c4_g2_i1	0.901313	0.000367817	AAT06189.1 elongation factor 1 alpha, partial [Mytilus edulis]
TRINITY_DN363936_c0_g1_i1	0.901219	0.000369181	CAG2256298.1 NNT [Mytilus edulis]
TRINITY_DN17362_c3_g1_i1	0.901218	0.000369197	CAC5409201.1 VDAC2 [Mytilus coruscus]
TRINITY_DN56359_c0_g1_i1	0.901141	0.000370312	CAC5365468.1 PTPN23 [Mytilus coruscus]
TRINITY_DN25839_c0_g2_i2	0.900742	0.000376139	VDI44161.1 receptor-type tyrosine-protein phosphatase T [Mytilus galloprovincialis]
TRINITY_DN157243_c0_g1_i1	0.900421	0.000380879	CAG2218259.1 CEP76 [Mytilus edulis]
TRINITY_DN153758_c0_g1_i1	0.899684	0.000391919	VDI77840.1 toll-like receptor 13 [Mytilus galloprovincialis]
TRINITY_DN75942_c0_g1_i1	0.899462	0.000395286	VDI28038.1 RNA-binding protein Musashi [Mytilus galloprovincialis]
TRINITY_DN93314_c1_g1_i1	0.898871	0.000404362	CAG2240088.1 exlX [Mytilus edulis]
TRINITY_DN389176_c0_g1_i1	0.898586	0.000408797	ACR24952.1 ribosomal protein L28, partial [Lepidochitona cinerea]
TRINITY_DN612_c5_g1_i10	0.897167	0.000431406	CAG2250059.1 E3.6.1.52 [Mytilus edulis]
TRINITY_DN19661_c0_g1_i3	0.89588	0.000452678	VDI20955.1 nicotinic acetylcholine receptor, invertebrate [Mytilus galloprovincialis]
TRINITY_DN13269_c8_g1_i2	0.895841	0.000453331	VDI31927.1 lipopolysaccharide-induced tumor necrosis factor-alpha factor [Mytilus galloprovincialis]
TRINITY_DN38029_c0_g1_i1	0.895028	0.000467179	VDI22510.1 neogenin [Mytilus galloprovincialis]
TRINITY_DN193851_c0_g1_i1	0.894593	0.000474721	CAC5377540.1 RP-L23Ae [Mytilus coruscus]
TRINITY_DN158422_c0_g1_i1	0.894525	0.000475905	VDH93830.1 ankyrin [Mytilus galloprovincialis]
TRINITY_DN165492_c0_g1_i1	0.893032	0.000502498	CAC5423594.1 CRYB [Mytilus coruscus]
TRINITY_DN67379_c0_g2_i1	0.892258	0.000516698	VDI35632.1 calpain, invertebrate [Mytilus galloprovincialis]
TRINITY_DN34146_c0_g1_i1	0.891808	0.000525082	CAG2230326.1 Retinol dehydrogenase 10-A,Estradiol 17-beta-dehydrogenase 11,Protein dhs-3,17-beta-hydroxysteroid dehydrogenase 13 [Mytilus edulis]
TRINITY_DN52881_c0_g4_i1	0.891513	0.000530632	CAG2213478.1 TRPM2 [Mytilus edulis]
TRINITY_DN320310_c0_g1_i1	0.891149	0.000537546	VDI13573.1 succinate dehydrogenase (ubiquinone) flavoprotein subunit [Mytilus galloprovincialis]
TRINITY_DN159228_c0_g2_i1	0.890242	0.00055506	VDI59001.1 large subunit ribosomal protein L27Ae [Mytilus galloprovincialis]
TRINITY_DN87545_c0_g1_i1	0.889771	0.000564329	CAC5386885.1 RAN [Mytilus coruscus]
TRINITY_DN2576_c0_g2_i1	0.889643	0.000566862	CAC5358055.1 RP-L24e [Mytilus coruscus]
TRINITY_DN25078_c0_g1_i12	0.889401	0.000571677	VDI22206.1 phenylalanine-4-hydroxylase [Mytilus galloprovincialis]
TRINITY_DN108649_c0_g1_i3	0.889335	0.000572989	XP_034323646.1 THAP domain-containing protein 11-like [Crassostrea gigas]
TRINITY_DN177892_c1_g1_i1	0.888427	0.000591362	CAG2188911.1 TRIM2_3 [Mytilus edulis]
TRINITY_DN373653_c0_g1_i1	0.887513	0.000610283	UDE22406.1 cathepsin D3 [Mytilus galloprovincialis]
TRINITY_DN8605_c0_g1_i4	0.887511	0.000610315	VDI39081.1 fibroblast growth factor receptor 2 [Mytilus galloprovincialis]
TRINITY_DN30175_c0_g1_i1	0.887167	0.000617546	CAC5392899.1 RP-L11e [Mytilus coruscus]
TRINITY_DN190184_c0_g1_i1	0.886061	0.000641223	OPL21695.1 serine 2 threonine-protein phosphatase with ef-hands, partial [Mytilus galloprovincialis]
TRINITY_DN142636_c0_g1_i1	0.884881	0.000667222	SCN46548.1 predicted protein [methanotrophic endosymbiont of Bathymodiolus azoricus (Menez Gwen)]
TRINITY_DN176159_c1_g1_i1	0.884585	0.000673875	CAC5398277.1 RNF213 [Mytilus coruscus]
TRINITY_DN87608_c0_g1_i1	0.883459	0.000699568	KJH43038.1 Plectin/S10 domain protein [Dictyocaulus viviparus]
TRINITY_DN20436_c0_g1_i1	0.882979	0.00071072	CAG2202227.1 Crustacean calcium-binding protein 23,Calcyphosin,Calcyphosin-like protein [Mytilus edulis]
TRINITY_DN45740_c0_g1_i1	0.882877	0.00071312	NP_001033059.1 caspase-3 [Monodelphis domestica]
TRINITY_DN349083_c0_g1_i1	0.882447	0.000723252	ORX91382.1 ribosomal protein L18e [Basidiobolus meristosporus CBS 931.73]
TRINITY_DN123341_c0_g1_i1	0.882287	0.000727069	VDI51869.1 homeobox protein MSX [Mytilus galloprovincialis]
TRINITY_DN124526_c0_g1_i1	0.881543	0.000744933	VDI74216.1 small subunit ribosomal protein S9e [Mytilus galloprovincialis]
TRINITY_DN43074_c0_g1_i1	0.881249	0.000752066	CAG2227995.1 BIRC4 [Mytilus edulis]
TRINITY_DN263045_c0_g1_i1	0.881117	0.000755298	VDH92792.1 Rap guanine nucleotide exchange factor 2 [Mytilus galloprovincialis]
TRINITY_DN143060_c0_g2_i1	0.880941	0.000759596	CAG2243886.1 RP-L26e [Mytilus edulis]
TRINITY_DN172956_c0_g1_i1	0.880757	0.00076415	CAG2189974.1 PXDN [Mytilus edulis]
TRINITY_DN2891_c2_g1_i1	0.880742	0.00076451	XP_033763758.1 uncharacterized protein LOC117344963 [Pecten maximus]
TRINITY_DN41369_c0_g1_i1	0.880721	0.00076502	VDI04847.1 large subunit ribosomal protein L10Ae [Mytilus galloprovincialis]
TRINITY_DN2019_c1_g2_i1	0.880621	0.000767489	CAG2201565.1 STRA6 [Mytilus edulis]
TRINITY_DN57585_c0_g1_i6	0.880575	0.000768644	CAG2235655.1 LRP1B [Mytilus edulis]
TRINITY_DN61537_c0_g1_i1	0.880294	0.000775623	VDI54737.1 dual specificity tyrosine-phosphorylation-regulated kinase 2/3/4, partial [Mytilus galloprovincialis]
TRINITY_DN317210_c0_g1_i1	0.880186	0.000778317	CAC5414677.1 ATG4 [Mytilus coruscus]
TRINITY_DN141650_c1_g1_i2	0.880015	0.000782605	CAC5388339.1 CTSD [Mytilus coruscus]
TRINITY_DN29964_c2_g1_i1	0.879973	0.00078367	VDI34459.1 large subunit ribosomal protein L6e [Mytilus galloprovincialis]
TRINITY_DN62994_c0_g1_i1	0.879414	0.00079781	KPP77855.1 histone H3.3-like, partial [Scleropages formosus]
TRINITY_DN25229_c0_g1_i12	0.879243	0.000802166	VDI74674.1 nicotinamide/nicotinate riboside kinase [Mytilus galloprovincialis]
TRINITY_DN301009_c0_g1_i1	0.87924	0.000802236	CAC5425255.1 add [Mytilus coruscus]
TRINITY_DN167550_c0_g1_i2	0.879211	0.000802992	CAG2257825.1 Receptor-type tyrosine-protein phosphatase eta,Receptor-type tyrosine-protein phosphatase R,Receptor-type tyrosine-protein phosphatase beta,Tyrosine-protein phosphatase non-receptor type 11,Receptor-type tyrosine-protein phosphatase N2 [Mytilus edulis]
TRINITY_DN95325_c0_g1_i1	0.878076	0.0008324	XP_022335206.1 caprin-1-like isoform X2 [Crassostrea virginica]
TRINITY_DN196532_c1_g1_i1	0.877782	0.000840158	CAG2188357.1 LIPT1 [Mytilus edulis]
TRINITY_DN29972_c1_g1_i2	0.87647	0.000875372	CAG2201055.1 DMBT1 [Mytilus edulis]
TRINITY_DN72348_c2_g1_i1	0.876285	0.000880428	VDI05750.1 D-amino-acid oxidase [Mytilus galloprovincialis]
TRINITY_DN8530_c0_g1_i7	0.87553	0.000901257	CAC5416598.1 Retinal-binding protein [Mytilus coruscus]
TRINITY_DN57708_c0_g1_i1	0.875439	0.000903804	CAC5390597.1 CYP4B1 [Mytilus coruscus]
TRINITY_DN183513_c0_g1_i1	0.874886	0.000919303	CAC5400808.1 RP-L24e [Mytilus coruscus]
TRINITY_DN24094_c0_g1_i1	0.872998	0.000973748	CAG2185237.1 Myoneurin,Gastrula zinc finger protein XlCGF17.1,Zinc finger protein 143,Zinc finger protein 155,Zinc finger protein 214,Zinc finger and SCAN domain-containing protein 32,Zinc finger protein 250,Zinc finger protein 76,Zinc finger protein 878,Zinc finger protein 41,Zinc finger and SCAN domain-containing protein 2,Zinc finger protein 234,Zinc finger protein 554,Zinc finger protein 30,Z…
TRINITY_DN123121_c0_g1_i1	0.871411	0.00102129	CAG2255041.1 EIF2AK4 [Mytilus edulis]
TRINITY_DN258284_c0_g3_i1	0.871276	0.00102542	AGI05193.1 toll-like receptor Q precursor [Mytilus galloprovincialis]
TRINITY_DN118639_c0_g1_i7	0.87051	0.00104903	QEP54787.1 CYP3A-like isoform 1 [Mytilus coruscus]
TRINITY_DN79893_c0_g1_i1	0.869966	0.00106605	ABY63300.1 actin, partial [Tridacna maxima]
TRINITY_DN17250_c0_g1_i5	0.868379	0.00111681	VDI68593.1 raw [Mytilus galloprovincialis]
TRINITY_DN251305_c0_g1_i7	0.867643	0.00114093	CAG2222427.1 ARMS [Mytilus edulis]
TRINITY_DN73125_c0_g1_i1	0.867209	0.00115535	CAG2198513.1 RP-S4e [Mytilus edulis]
TRINITY_DN6946_c0_g2_i2	0.866166	0.00119051	VDI79957.1 spastic paraplegia 7 [Mytilus galloprovincialis]
TRINITY_DN7127_c0_g1_i6	0.865109	0.00122692	CAG2191047.1 NCF2 [Mytilus edulis]
TRINITY_DN42232_c0_g1_i3	0.864732	0.00124013	CAG2223287.1 NAB [Mytilus edulis]
TRINITY_DN35195_c0_g1_i6	0.8642	0.00125889	CAG2235936.1 Kelch domain-containing protein 8A [Mytilus edulis]
TRINITY_DN344057_c0_g1_i1	0.863866	0.00127079	CAG2242822.1 SCP2 [Mytilus edulis]
TRINITY_DN35015_c0_g1_i1	0.863739	0.00127532	CAC5377257.1 CALM [Mytilus coruscus]
TRINITY_DN223668_c1_g2_i1	0.863634	0.00127911	CAG2256070.1 TTN [Mytilus edulis]
TRINITY_DN300214_c0_g1_i1	0.863602	0.00128023	CAC5381718.1 PSMB6 [Mytilus coruscus]
TRINITY_DN42412_c0_g1_i34	0.863471	0.00128496	CAC5405949.1 E4.1.1.17 [Mytilus coruscus]
TRINITY_DN35126_c0_g1_i3	0.863442	0.00128601	CAG2239398.1 Tyrosine-protein phosphatase non-receptor type 7,Receptor-type tyrosine-protein phosphatase R,Tyrosine-protein phosphatase non-receptor type 5,Receptor-type tyrosine-protein phosphatase O,Receptor-type tyrosine-protein phosphatase beta [Mytilus edulis]
TRINITY_DN61260_c0_g2_i1	0.86298	0.00130275	CAC5419801.1 RP-L14e [Mytilus coruscus]
TRINITY_DN211219_c0_g1_i1	0.862679	0.00131373	VDH89041.1 S-adenosylmethionine synthetase [Mytilus galloprovincialis]
TRINITY_DN310409_c0_g1_i1	0.862021	0.00133798	CAG2206111.1 ANK [Mytilus edulis]
TRINITY_DN50414_c0_g1_i1	0.86134	0.00136342	CAG2229643.1 MITA [Mytilus edulis]
TRINITY_DN143183_c0_g1_i2	0.861314	0.00136439	CAG2193401.1 CD109 [Mytilus edulis]
TRINITY_DN361229_c0_g1_i1	0.861303	0.00136482	XP_043563521.1 protein transport protein Sec61 subunit alpha-like [Chiloscyllium plagiosum]
TRINITY_DN335441_c0_g1_i1	0.860933	0.00137877	ABW90386.1 putative ribosomal protein S27 [Sipunculus nudus]
TRINITY_DN329095_c0_g1_i1	0.860848	0.00138201	CAG2227292.1 Tetratricopeptide repeat protein 39A,Tetratricopeptide repeat protein 39B [Mytilus edulis]
TRINITY_DN252361_c0_g1_i1	0.860714	0.00138708	CAG2198164.1 COL9A [Mytilus edulis]
TRINITY_DN104403_c0_g1_i1	0.860402	0.00139902	VDI54738.1 dual specificity tyrosine-phosphorylation-regulated kinase 2/3/4 [Mytilus galloprovincialis]
TRINITY_DN115532_c0_g1_i1	0.86038	0.00139988	CAG2244988.1 ANK [Mytilus edulis]
TRINITY_DN50548_c0_g1_i6	0.860237	0.00140535	CAG2188240.1 CD206 [Mytilus edulis]
TRINITY_DN17184_c0_g1_i4	0.859816	0.00142162	XP_021350729.1 uncharacterized protein LOC110448677 [Mizuhopecten yessoensis]
TRINITY_DN73702_c0_g1_i1	0.859479	0.00143472	VDI39107.1 solute carrier organic anion transporter family, member 4A, partial [Mytilus galloprovincialis]
TRINITY_DN11210_c0_g1_i1	0.858478	0.00147418	CAG2186139.1 RHOQ [Mytilus edulis]
TRINITY_DN20357_c0_g1_i13	0.858364	0.00147871	CAC5415951.1 YTHDF [Mytilus coruscus]
TRINITY_DN77757_c0_g2_i1	0.85767	0.00150657	CAG2211964.1 ANKS1 [Mytilus edulis]
TRINITY_DN139572_c0_g1_i6	0.857525	0.00151246	CAG2255426.1 NEO1 [Mytilus edulis]
TRINITY_DN35796_c0_g1_i2	0.85745	0.00151549	CAG2221594.1 Beta-galactosidase-1-like protein 2,Beta-galactosidase-1-like protein 3 [Mytilus edulis]
TRINITY_DN174758_c0_g1_i1	0.856896	0.0015381	CAG2241294.1 CAPNN [Mytilus edulis]
TRINITY_DN4218_c2_g1_i1	0.856742	0.00154443	OPL21695.1 serine 2 threonine-protein phosphatase with ef-hands, partial [Mytilus galloprovincialis]
TRINITY_DN324433_c0_g1_i1	0.856233	0.00156551	ACR24967.1 ribosomal protein S16, partial [Lepidochitona cinerea]
TRINITY_DN48101_c0_g1_i1	0.856148	0.00156904	CAC5376278.1 CFL [Mytilus coruscus]
TRINITY_DN35535_c0_g1_i1	0.855962	0.00157678	VDI33702.1 ATP-binding cassette, subfamily A (ABC1), member 5 [Mytilus galloprovincialis]
TRINITY_DN394395_c0_g1_i1	0.855916	0.00157873	KAF6019560.1 RpS23 [Bugula neritina]
TRINITY_DN14883_c0_g1_i7	0.855909	0.00157902	VDI52949.1 mitochondrial translocator assembly and maintenance protein 41 [Mytilus galloprovincialis]
TRINITY_DN18664_c0_g2_i1	0.855593	0.00159227	VDI34092.1 blast:Probable RNA-directed DNA polymerase from transposon BS [Mytilus galloprovincialis]
TRINITY_DN18108_c0_g1_i2	0.855128	0.00161194	CAC5400423.1 TLR3 [Mytilus coruscus]
TRINITY_DN1655_c0_g1_i9	0.855082	0.0016139	CAG2203864.1 NNMT [Mytilus edulis]
TRINITY_DN328887_c0_g1_i1	0.855052	0.00161514	VDI46041.1 small nuclear ribonucleoprotein D1 [Mytilus galloprovincialis]
TRINITY_DN340867_c0_g1_i1	0.855018	0.00161661	VDI60953.1 tripartite motif-containing protein 2/3 [Mytilus galloprovincialis]
TRINITY_DN21397_c0_g1_i12	0.854845	0.00162397	VDH91461.1 von Hippel-Lindau disease tumor supressor [Mytilus galloprovincialis]
TRINITY_DN370937_c0_g1_i1	0.853435	0.00168499	CAC5362375.1 RP-L21e [Mytilus coruscus]
TRINITY_DN348065_c0_g1_i1	0.852025	0.00174763	CAG2189974.1 PXDN [Mytilus edulis]
TRINITY_DN241004_c0_g1_i1	0.852011	0.00174828	CAC5409311.1 RP-L3e [Mytilus coruscus]
TRINITY_DN149577_c0_g1_i3	0.851862	0.00175498	AAF31653.1 beta-tubulin 1, partial [Allomyces macrogynus]
TRINITY_DN387263_c0_g1_i1	0.851815	0.00175713	VDI39968.1 large subunit ribosomal protein L31e [Mytilus galloprovincialis]
TRINITY_DN53292_c0_g1_i1	0.851813	0.00175721	VDI35633.1 calpain, invertebrate [Mytilus galloprovincialis]
TRINITY_DN40265_c0_g1_i1	0.851698	0.00176243	VDI46823.1 large subunit ribosomal protein L22e [Mytilus galloprovincialis]
TRINITY_DN89107_c0_g3_i3	0.85145	0.00177367	CAG2195846.1 Basic immunoglobulin-like variable motif-containing protein [Mytilus edulis]
TRINITY_DN158872_c0_g1_i1	0.851281	0.00178138	VDI35638.1 aquaporin rerated protein, invertebrate [Mytilus galloprovincialis]
TRINITY_DN20916_c0_g2_i1	0.850834	0.00180186	CAQ63457.1 ribosomal protein [Mytilus galloprovincialis]
TRINITY_DN377212_c0_g1_i1	0.850421	0.00182095	VDH91496.1 MFS transporter, FLVCR family, disrupted in renal carcinoma protein 2 [Mytilus galloprovincialis]
TRINITY_DN121873_c0_g1_i1	0.849367	0.0018703	CAG2186815.1 ATP1 [Mytilus edulis]
TRINITY_DN119702_c0_g1_i1	0.848915	0.00189176	CAG2215220.1 DCAF1 [Mytilus edulis]
TRINITY_DN55605_c0_g2_i1	0.848462	0.00191345	CAG2250667.1 E4.1.1.32 [Mytilus edulis]
TRINITY_DN40743_c0_g1_i5	0.848397	0.00191659	CAG2201673.1 TSPAN18 [Mytilus edulis]
TRINITY_DN323123_c0_g1_i1	0.8464	0.00201447	YP_009407575.1 NADH dehydrogenase subunit 6 [Gigantidas platifrons]
TRINITY_DN51456_c0_g1_i3	0.845811	0.00204403	VDI18564.1 arachidonate 5-lipoxygenase [Mytilus galloprovincialis]
TRINITY_DN9341_c0_g1_i20	0.845582	0.00205559	CAC5404332.1 STRADA [Mytilus coruscus]
TRINITY_DN83424_c0_g1_i2	0.844683	0.00210147	OPL21695.1 serine 2 threonine-protein phosphatase with ef-hands, partial [Mytilus galloprovincialis]
TRINITY_DN116404_c0_g1_i2	0.844125	0.00213033	CAG2218884.1 COL6A [Mytilus edulis]
TRINITY_DN242862_c0_g1_i1	0.844065	0.00213344	CAG2225669.1 PRDX5 [Mytilus edulis]
TRINITY_DN54178_c0_g1_i1	0.843925	0.00214072	VDI60795.1 solute carrier family 4 (sodium bicarbonate cotransporter), member 7 [Mytilus galloprovincialis]
TRINITY_DN50919_c0_g1_i1	0.843458	0.00216519	VDI51125.1 prostaglandin E receptor 4 [Mytilus galloprovincialis]
TRINITY_DN59098_c1_g1_i1	0.843012	0.00218873	CAG2226087.1 CYP3A [Mytilus edulis]
TRINITY_DN147204_c0_g1_i1	0.842403	0.00222118	CAG2230650.1 BTBD3_6 [Mytilus edulis]
TRINITY_DN13826_c0_g1_i19	0.84219	0.00223259	CAG2250771.1 SLC17A5 [Mytilus edulis]
TRINITY_DN16847_c0_g1_i1	0.842157	0.00223434	VDI74024.1 alanyl-tRNA synthetase [Mytilus galloprovincialis]
TRINITY_DN6301_c1_g1_i1	0.842127	0.00223597	VDI34533.1 cholesterol 25-hydroxylase [Mytilus galloprovincialis]
TRINITY_DN17673_c0_g1_i11	0.840317	0.0023349	VDI83066.1 lysosomal alpha-mannosidase [Mytilus galloprovincialis]
TRINITY_DN48228_c0_g1_i1	0.840199	0.00234149	VDI60741.1 WD repeat-containing protein 23 [Mytilus galloprovincialis]
TRINITY_DN73815_c0_g1_i3	0.839923	0.00235687	XP_013927683.1 PREDICTED: cytoplasmic aconitate hydratase-like [Thamnophis sirtalis]
TRINITY_DN1459_c2_g1_i11	0.839279	0.00239303	VDI12728.1 uridine kinase [Mytilus galloprovincialis]
TRINITY_DN13108_c0_g1_i34	0.838873	0.0024161	CAG2230204.1 PGS1 [Mytilus edulis]
TRINITY_DN136608_c0_g2_i1	0.838605	0.00243138	CAC5388283.1 RP-L32e [Mytilus coruscus]
TRINITY_DN72596_c0_g1_i1	0.837921	0.00247067	CBH29411.1 heat shock protein 70kDa, partial [Plecoglossus altivelis]
TRINITY_DN257945_c0_g1_i1	0.837623	0.00248794	VDI78795.1 ammonium transporter, Amt family [Mytilus galloprovincialis]
TRINITY_DN23769_c1_g1_i5	0.837173	0.00251419	VDI78293.1 autophagy-related protein 16, animal type [Mytilus galloprovincialis]
TRINITY_DN56843_c0_g1_i11	0.836677	0.00254338	VDI08962.1 trafficking protein particle complex subunit 4 [Mytilus galloprovincialis]
TRINITY_DN212745_c0_g2_i1	0.836527	0.00255224	ADB22377.1 ubiquitin [Crassostrea hongkongensis]
TRINITY_DN40946_c0_g1_i7	0.835788	0.00259628	VDI31927.1 lipopolysaccharide-induced tumor necrosis factor-alpha factor [Mytilus galloprovincialis]
TRINITY_DN3736_c2_g1_i1	0.835163	0.00263391	XP_022043260.1 tubulin alpha-1C chain-like, partial [Acanthochromis polyacanthus]
TRINITY_DN278423_c0_g1_i1	0.834688	0.00266276	XP_041354795.1 60S ribosomal protein L35a-like [Gigantopelta aegis]
TRINITY_DN189434_c0_g1_i1	0.834679	0.00266334	VDI47578.1 DnaJ homolog subfamily C member 13 [Mytilus galloprovincialis]
TRINITY_DN13685_c1_g1_i10	0.834167	0.00269469	VDI79804.1 methylmalonyl-CoA mutase [Mytilus galloprovincialis]
TRINITY_DN15609_c0_g1_i23	0.834157	0.00269531	VDI57461.1 metalloproteinase inhibitor 3 [Mytilus galloprovincialis]
TRINITY_DN12581_c1_g2_i1	0.834104	0.00269859	PTB84290.1 actin, cytoplasmic 2, partial [Pseudidiomarina aestuarii]
TRINITY_DN30400_c0_g1_i1	0.833795	0.00271767	CAG2225576.1 RP-L19e [Mytilus edulis]
TRINITY_DN29561_c0_g1_i2	0.833763	0.00271968	CAG2207508.1 C9ORF72 [Mytilus edulis]
TRINITY_DN35585_c0_g2_i1	0.833746	0.00272072	CAC5382617.1 CAPNN [Mytilus coruscus]
TRINITY_DN321412_c0_g1_i1	0.833504	0.00273574	CAC5408172.1 RP-S11e [Mytilus coruscus]
TRINITY_DN73748_c0_g1_i2	0.832653	0.0027891	CAG2188094.1 LRP4 [Mytilus edulis]
TRINITY_DN8414_c5_g1_i1	0.831481	0.00286372	XP_043827305.1 caspase-3-like [Dromiciops gliroides]
TRINITY_DN38655_c0_g1_i3	0.8312	0.00288183	CAG2192877.1 CTSC [Mytilus edulis]
TRINITY_DN17308_c0_g1_i14	0.830485	0.00292834	OPL20353.1 ubiquitin-60s x3 ribosomal protein l40 isoform, partial [Mytilus galloprovincialis]
TRINITY_DN216629_c0_g1_i1	0.830096	0.00295379	VDI54417.1 tyrosine-protein phosphatase non-receptor type 23, partial [Mytilus galloprovincialis]
TRINITY_DN12181_c0_g1_i13	0.829507	0.00299274	CAG2232280.1 CPSF3 [Mytilus edulis]
TRINITY_DN15068_c0_g1_i1	0.828444	0.00306389	CAG2239955.1 DNAJC12 [Mytilus edulis]
TRINITY_DN335664_c0_g1_i1	0.827551	0.00312465	VDH94617.1 small subunit ribosomal protein S7e [Mytilus galloprovincialis]
TRINITY_DN156_c0_g1_i7	0.827348	0.00313852	CAG2250666.1 E4.1.1.32 [Mytilus edulis]
TRINITY_DN66739_c0_g1_i1	0.82693	0.00316733	CAG2229643.1 MITA [Mytilus edulis]
TRINITY_DN89102_c1_g1_i2	0.826872	0.00317134	CAC5394714.1 NEK1_4_5 [Mytilus coruscus]
TRINITY_DN9863_c0_g1_i6	0.826805	0.00317603	CAG2243797.1 AMPK [Mytilus edulis]
TRINITY_DN47963_c0_g1_i6	0.82678	0.00317776	CAG2195322.1 SLC35A4 [Mytilus edulis]
TRINITY_DN12814_c0_g1_i4	0.826708	0.00318271	VDI51211.1 protein daughter of sevenless [Mytilus galloprovincialis]
TRINITY_DN17656_c0_g1_i1	0.82644	0.00320138	XP_044175699.1 uncharacterized protein K02A2.6-like [Acropora millepora]
TRINITY_DN17684_c0_g1_i30	0.825153	0.00329198	CAC5400830.1 RMND5 [Mytilus coruscus]
TRINITY_DN62386_c0_g1_i4	0.824977	0.00330447	VDI43394.1 blast:Zinc finger protein 14 [Mytilus galloprovincialis]
TRINITY_DN1536_c1_g1_i1	0.824586	0.00333244	VDI30486.1 large subunit ribosomal protein L7e [Mytilus galloprovincialis]
TRINITY_DN104635_c0_g1_i1	0.824323	0.00335136	VDH89432.1 phosphatidylinositol-4,5-bisphosphate 3-kinase, partial [Mytilus galloprovincialis]
TRINITY_DN43826_c0_g1_i1	0.8242	0.00336021	VDI47115.1 hydroxymethylbilane synthase [Mytilus galloprovincialis]
TRINITY_DN52881_c0_g3_i1	0.823978	0.00337623	CAG2213478.1 TRPM2 [Mytilus edulis]
TRINITY_DN10542_c2_g1_i2	0.823788	0.00339	VDI27160.1 small subunit ribosomal protein S7 [Mytilus galloprovincialis]
TRINITY_DN11858_c0_g1_i5	0.823751	0.00339271	VDI78293.1 autophagy-related protein 16, animal type [Mytilus galloprovincialis]
TRINITY_DN265903_c0_g1_i1	0.823646	0.00340037	AAA63448.1 ribonuclease inhibitor, partial [Sus scrofa]
TRINITY_DN335913_c0_g1_i1	0.823557	0.00340687	CAC5379249.1 Collagen alpha-2(VI) chain,Collagen alpha-3(VI) chain,Collagen alpha-1(VI) chain,Collagen alpha-2(IV) chain,Collagen alpha-1(XXI) chain,Collagen alpha-1(XXVII) chain A,Collagen alpha-1(IV) chain,Collagen alpha-1(I) chain,Collagen alpha-1(XXIV) chain,Collagen alpha-4(VI) chain,Collagen alpha-1(XXVII) chain B,Collagen alpha-5(VI) chain,Collagen alpha-1(II) chain,Collagen alpha-6(VI) ch…
TRINITY_DN2116_c0_g1_i1	0.823345	0.00342228	CAG2250767.1 PP2C-like domain-containing protein CG9801 [Mytilus edulis]
TRINITY_DN13258_c1_g1_i10	0.823321	0.00342409	CAC5374945.1 PTDSS1 [Mytilus coruscus]
TRINITY_DN300559_c0_g1_i1	0.823178	0.0034345	CAC5383977.1 TEME2 [Mytilus coruscus]
TRINITY_DN167052_c0_g1_i1	0.822629	0.00347497	CAC5419295.1 CYP4B1 [Mytilus coruscus]
TRINITY_DN341610_c0_g1_i1	0.822348	0.00349574	CAC5418373.1 Translationally-controlled tumor protein homolog,Translationally-controlled tumor protein [Mytilus coruscus]
TRINITY_DN60599_c0_g1_i1	0.822161	0.00350962	VDI48594.1 aminopeptidase B [Mytilus galloprovincialis]
TRINITY_DN168263_c0_g1_i2	0.822042	0.00351851	CAG2242912.1 TRIM71 [Mytilus edulis]
TRINITY_DN11677_c0_g1_i1	0.821925	0.00352724	VDI06204.1 heart-and neural crest derivatives-expressed protein 2 [Mytilus galloprovincialis]
TRINITY_DN235505_c0_g1_i1	0.821883	0.00353037	VDI07568.1 solute carrier family 5 (sodium/glucose cotransporter), member 9 [Mytilus galloprovincialis]
TRINITY_DN8612_c1_g1_i14	0.821827	0.00353456	XP_033724616.1 serine/threonine-protein kinase mTOR-like [Pecten maximus]
TRINITY_DN40146_c2_g1_i1	0.821357	0.00356986	CAC5390597.1 CYP4B1 [Mytilus coruscus]
TRINITY_DN328997_c0_g1_i1	0.821235	0.00357902	VDI44770.1 small subunit ribosomal protein S10e [Mytilus galloprovincialis]
TRINITY_DN4043_c0_g1_i2	0.821182	0.00358306	VDI32952.1 protoheme IX farnesyltransferase [Mytilus galloprovincialis]
TRINITY_DN1745_c0_g1_i1	0.821009	0.00359617	CAG2231495.1 SPSB3 [Mytilus edulis]
TRINITY_DN23585_c0_g1_i1	0.820095	0.00366587	CAC5384367.1 RP-SAe [Mytilus coruscus]
TRINITY_DN28197_c0_g1_i3	0.820087	0.00366644	CAC5383933.1 CENPN [Mytilus coruscus]
TRINITY_DN73665_c0_g1_i1	0.819444	0.00371614	CAG2198916.1 Uncharacterized protein C2orf42 homolog,Uncharacterized protein C2orf42 [Mytilus edulis]
TRINITY_DN6355_c0_g1_i2	0.818968	0.00375318	VDI56049.1 tRNA wybutosine-synthesizing protein 1 [Mytilus galloprovincialis]
TRINITY_DN22920_c0_g1_i1	0.818729	0.00377188	CAQ63456.1 ribosomal protein [Mytilus galloprovincialis]
TRINITY_DN11018_c1_g1_i1	0.81791	0.00383644	VDI71019.1 carboxylesterase 2 [Mytilus galloprovincialis]
TRINITY_DN152276_c0_g2_i1	0.817653	0.00385685	VDI04881.1 tripartite motif-containing protein 2/3 [Mytilus galloprovincialis]
TRINITY_DN41822_c0_g1_i1	0.817033	0.00390647	CAG2246095.1 SRD5A1 [Mytilus edulis]
TRINITY_DN1771_c4_g1_i2	0.816306	0.0039652	CAC5356834.1 CUBN [Mytilus coruscus]
TRINITY_DN142556_c0_g1_i4	0.816284	0.00396704	XP_007905079.2 caspase-3 [Callorhinchus milii]
TRINITY_DN320893_c0_g1_i1	0.816258	0.00396914	CAC5364852.1 Ankyrin repeat and fibronectin type-III domain-containing protein 1 [Mytilus coruscus]
TRINITY_DN6891_c0_g1_i3	0.815751	0.00401053	CAC5367422.1 P3H1 [Mytilus coruscus]
TRINITY_DN12065_c0_g2_i1	0.815395	0.00403971	CAG2244237.1 KRAB [Mytilus edulis]
TRINITY_DN141057_c0_g1_i1	0.814756	0.0040926	VDI12593.1 sacsin [Mytilus galloprovincialis]
TRINITY_DN111968_c2_g1_i1	0.814631	0.00410304	XP_033728594.1 40S ribosomal protein S26-like [Pecten maximus]
TRINITY_DN52427_c0_g1_i4	0.814582	0.00410709	CAG2204965.1 DNLZ [Mytilus edulis]
TRINITY_DN1546_c4_g1_i5	0.814574	0.00410779	CAG2194149.1 ELP3 [Mytilus edulis]
TRINITY_DN255158_c0_g1_i1	0.81404	0.0041524	CAG2218884.1 COL6A [Mytilus edulis]
TRINITY_DN220464_c0_g1_i1	0.813914	0.00416304	AJQ21537.1 TNF ligand-like 3 [Mytilus galloprovincialis]
TRINITY_DN17411_c0_g1_i4	0.813067	0.0042347	CAC5422235.1 Sulfotransferase family cytosolic 1B member 1 [Mytilus coruscus]
TRINITY_DN210013_c0_g1_i1	0.81239	0.00429263	CAG2220034.1 Short transient receptor potential channel 6 [Mytilus edulis]
TRINITY_DN79099_c0_g2_i1	0.81227	0.00430294	VDI30314.1 trypsin [Mytilus galloprovincialis]
TRINITY_DN17493_c0_g1_i15	0.811914	0.00433375	VDI37942.1 prostaglandin E receptor 4 [Mytilus galloprovincialis]
TRINITY_DN115168_c0_g1_i8	0.811849	0.00433933	CAC5415116.1 HMCN [Mytilus coruscus]
TRINITY_DN179518_c0_g1_i30	0.811687	0.00435341	CAG2223858.1 SNAPC3 [Mytilus edulis]
TRINITY_DN309323_c0_g1_i1	0.811295	0.00438752	CAG2198544.1 TTN [Mytilus edulis]
TRINITY_DN125458_c0_g1_i1	0.811024	0.00441125	VDI79678.1 14-3-3 protein beta/theta/zeta [Mytilus galloprovincialis]
TRINITY_DN11073_c0_g1_i10	0.810862	0.00442552	CAC5377850.1 GCLM [Mytilus coruscus]
TRINITY_DN27012_c0_g1_i8	0.810714	0.00443846	CAC5414380.1 PSMA4 [Mytilus coruscus]
TRINITY_DN18841_c0_g1_i1	0.810468	0.00446019	VDI41091.1 translation initiation factor 2A [Mytilus galloprovincialis]
TRINITY_DN11488_c0_g1_i1	0.810223	0.00448188	CAG2254370.1 PISD [Mytilus edulis]
TRINITY_DN51386_c0_g1_i1	0.810057	0.00449666	CAG2209420.1 TLR13 [Mytilus edulis]
TRINITY_DN21099_c0_g1_i33	0.809968	0.00450455	CAC5357578.1 CYP49A [Mytilus coruscus]
TRINITY_DN25348_c0_g1_i2	0.809951	0.00450608	CAG2244855.1 FLOT [Mytilus edulis]
TRINITY_DN214182_c0_g1_i1	0.809919	0.00450889	VDI30486.1 large subunit ribosomal protein L7e [Mytilus galloprovincialis]
TRINITY_DN71860_c0_g1_i4	0.809823	0.00451752	CAG2248964.1 Peptidylglycine alpha-amidating monooxygenase,Probable peptidylglycine alpha-hydroxylating monooxygenase 1,Peptidyl-glycine alpha-amidating monooxygenase A,Peptidyl-glycine alpha-amidating monooxygenase,Peptidyl-glycine alpha-amidating monooxygenase B,Peptidylglycine alpha-hydroxylating monooxygenase [Mytilus edulis]
TRINITY_DN338665_c0_g1_i1	0.809808	0.00451883	XP_013401087.1 RNA-binding protein 39-like [Lingula anatina]
TRINITY_DN85863_c0_g1_i3	0.809743	0.00452465	CAG2222460.1 ARMS [Mytilus edulis]
TRINITY_DN9912_c0_g1_i10	0.809713	0.0045273	OPL21638.1 membrane 1-like metallo-endopeptidase-like, partial [Mytilus galloprovincialis]
TRINITY_DN81195_c1_g1_i1	0.809555	0.00454146	CAG2207730.1 RNF213 [Mytilus edulis]
TRINITY_DN109676_c2_g1_i1	0.809528	0.00454387	CAG2188419.1 TTN [Mytilus edulis]
TRINITY_DN91440_c0_g1_i3	0.809522	0.00454437	VDH89071.1 ribosome biogenesis protein BMS1 [Mytilus galloprovincialis]
TRINITY_DN38403_c1_g1_i9	0.809141	0.00457863	CAG2236614.1 CHRNN [Mytilus edulis]
TRINITY_DN28476_c7_g1_i1	0.809117	0.00458074	VDI44030.1 myeloid differentiation primary response protein MyD88, partial [Mytilus galloprovincialis]
TRINITY_DN125432_c0_g1_i1	0.808688	0.00461956	OPL21695.1 serine 2 threonine-protein phosphatase with ef-hands, partial [Mytilus galloprovincialis]
TRINITY_DN12209_c0_g1_i30	0.807866	0.00469441	CAC5359057.1 PDE9 [Mytilus coruscus]
TRINITY_DN288129_c0_g1_i1	0.807769	0.00470337	CAG2242820.1 NIPBL [Mytilus edulis]
TRINITY_DN227714_c0_g2_i2	0.807322	0.0047445	CAG2209531.1 PHB2 [Mytilus edulis]
TRINITY_DN49991_c0_g1_i1	0.806939	0.00477998	CAG2206233.1 GUSB [Mytilus edulis]
TRINITY_DN89107_c0_g1_i5	0.806874	0.00478606	CAG2195847.1 Basic immunoglobulin-like variable motif-containing protein [Mytilus edulis]
TRINITY_DN33133_c0_g1_i1	0.806291	0.00484042	DAZ86115.1 TPA_inf: venom-related protein PPI [Conus ebraeus]
TRINITY_DN177440_c2_g1_i1	0.806257	0.00484362	VDH93352.1 ubiquitin carboxyl-terminal hydrolase L3 [Mytilus galloprovincialis]
TRINITY_DN6812_c0_g1_i1	0.806184	0.00485044	VDI59012.1 baculoviral IAP repeat-containing protein 7/8 [Mytilus galloprovincialis]
TRINITY_DN324821_c0_g1_i1	0.805981	0.00486955	CAC5358116.1 RAB11A [Mytilus coruscus]
TRINITY_DN86094_c0_g1_i1	0.805761	0.00489026	CAC5409845.1 selD [Mytilus coruscus]
TRINITY_DN184416_c0_g1_i1	0.805719	0.00489429	ABP04054.1 RNA-binding protein [Pinctada fucata]
TRINITY_DN93988_c0_g1_i1	0.805024	0.00496019	VDI25101.1 heterogeneous nuclear ribonucleoprotein L [Mytilus galloprovincialis]
TRINITY_DN298796_c0_g1_i1	0.80483	0.00497876	CAC5409659.1 E2.7.1.20 [Mytilus coruscus]
TRINITY_DN29857_c0_g2_i2	0.804591	0.00500166	VDH93830.1 ankyrin [Mytilus galloprovincialis]
TRINITY_DN145291_c0_g2_i1	0.804505	0.00500991	VDH97963.1 blast:Zinc finger protein 112 [Mytilus galloprovincialis]
TRINITY_DN26934_c0_g1_i18	0.804335	0.00502624	CAC5364898.1 AGPHD1 [Mytilus coruscus]
TRINITY_DN93357_c0_g1_i3	0.80386	0.00507206	CAG2239146.1 GRIK3 [Mytilus edulis]
TRINITY_DN341063_c0_g1_i1	0.803766	0.00508121	CAC5401846.1 EEF1G [Mytilus coruscus]
TRINITY_DN304572_c0_g1_i1	0.803387	0.00511808	VDI05960.1 all-trans-retinol dehydrogenase (NAD+) [Mytilus galloprovincialis]
TRINITY_DN189150_c0_g1_i5	0.803194	0.0051369	AAU88193.1 cytoplasmic actin, partial [Trichoplusia ni]
TRINITY_DN76516_c0_g1_i1	0.803008	0.00515507	AXN70190.1 ATP synthase subunit alpha, partial [Scophthalmus maximus]
TRINITY_DN290324_c0_g1_i1	0.802905	0.00516524	KRW99946.1 Ribosomal protein S10 domain [Pseudocohnilembus persalinus]
TRINITY_DN176318_c0_g1_i4	0.802023	0.00525226	VDI35402.1 glycerophosphodiester phosphodiesterase [Mytilus galloprovincialis]
TRINITY_DN382815_c0_g1_i1	0.802001	0.00525447	XP_041351981.1 c-Myc-binding protein-like [Gigantopelta aegis]
TRINITY_DN387652_c0_g1_i1	0.8013	0.00532443	VDI55072.1 far upstream element-binding protein [Mytilus galloprovincialis]
TRINITY_DN310299_c0_g1_i1	0.801268	0.00532767	CAG2237565.1 ANPRB [Mytilus edulis]
TRINITY_DN155022_c0_g1_i1	0.800995	0.0053551	CAG2242683.1 MAN2 [Mytilus edulis]
TRINITY_DN243193_c0_g1_i1	0.800984	0.00535628	VDI57267.1 receptor-type tyrosine-protein phosphatase F [Mytilus galloprovincialis]
TRINITY_DN152931_c0_g1_i1	0.800957	0.005359	CAG2201363.1 AKT [Mytilus edulis]
TRINITY_DN315_c0_g1_i7	0.800713	0.00538355	CAC5373917.1 PARP10_14_15 [Mytilus coruscus]
TRINITY_DN4714_c2_g2_i1	0.800565	0.00539859	VDI38436.1 blast:Arachidonate 5-lipoxygenase [Mytilus galloprovincialis]
TRINITY_DN5141_c0_g1_i3	0.799973	0.00545877	CAG2236654.1 ATAD3A_B [Mytilus edulis]
TRINITY_DN102357_c0_g1_i2	0.799653	0.00549145	VDI74325.1 very low-density lipoprotein receptor [Mytilus galloprovincialis]
TRINITY_DN353205_c0_g1_i1	0.79965	0.00549184	CAC5389792.1 EEF1B [Mytilus coruscus]
TRINITY_DN25905_c0_g1_i4	0.799529	0.00550423	CAC5402016.1 DIRC2 [Mytilus coruscus]
TRINITY_DN89527_c0_g1_i1	0.79948	0.00550922	VDI73988.1 solute carrier organic anion transporter family, member 4A [Mytilus galloprovincialis]
TRINITY_DN41244_c0_g1_i1	0.798957	0.00556314	CAG2225634.1 SSA2 [Mytilus edulis]
TRINITY_DN85919_c0_g1_i4	0.798362	0.00562499	CAG2258048.1 SULT1 [Mytilus edulis]
TRINITY_DN213044_c0_g1_i1	0.798322	0.00562923	VDI46789.1 aquaporin-8 [Mytilus galloprovincialis]
TRINITY_DN212368_c0_g1_i3	0.798315	0.00562989	VDI41166.1 poly [ADP-ribose] polymerase 10/14/15 [Mytilus galloprovincialis]
TRINITY_DN66086_c0_g2_i1	0.798139	0.00564831	KAI1704641.1 ring finger domain-containing protein [Ditylenchus destructor]
TRINITY_DN240478_c0_g1_i1	0.797877	0.0056758	VDI53844.1 programmed cell death protein 10 [Mytilus galloprovincialis]
TRINITY_DN241151_c0_g1_i1	0.797624	0.00570238	KAH9523293.1 Protein tar1 [Bulinus truncatus]
TRINITY_DN24637_c0_g1_i14	0.797284	0.00573828	VDI08516.1 aminoacylase [Mytilus galloprovincialis]
TRINITY_DN15223_c0_g1_i2	0.797027	0.00576552	CAG2197318.1 CHT1 [Mytilus edulis]
TRINITY_DN276010_c0_g1_i1	0.796149	0.00585925	XP_041041147.1 eukaryotic translation elongation factor 1 delta b (guanine nucleotide exchange protein) isoform X5 [Carcharodon carcharias]
TRINITY_DN139201_c0_g1_i1	0.795776	0.00589933	VDI64635.1 solute carrier family 27 (fatty acid transporter), member 6 [Mytilus galloprovincialis]
TRINITY_DN311329_c0_g1_i1	0.795688	0.00590885	VDI62032.1 polypeptide N-acetylgalactosaminyltransferase [Mytilus galloprovincialis]
TRINITY_DN91084_c0_g1_i1	0.795411	0.00593888	CAG2187701.1 FUT1_2 [Mytilus edulis]
TRINITY_DN143410_c0_g1_i1	0.795302	0.00595071	AFI56372.1 isocitrate dehydrogenase [Mytilus trossulus]
TRINITY_DN1949_c0_g1_i16	0.794733	0.00601263	VDI45269.1 peptidyl-prolyl isomerase H (cyclophilin H) [Mytilus galloprovincialis]
TRINITY_DN41710_c1_g1_i1	0.794568	0.00603078	VDH93524.1 DNA mismatch repair protein MSH4, partial [Mytilus galloprovincialis]
TRINITY_DN181103_c0_g1_i2	0.794474	0.00604106	CAG2186976.1 POMGNT1 [Mytilus edulis]
TRINITY_DN51254_c0_g1_i3	0.794434	0.00604548	CAG2195063.1 LHX6_8 [Mytilus edulis]
TRINITY_DN238245_c0_g1_i1	0.794421	0.00604692	XP_025109326.1 protein nanos-like isoform X2 [Pomacea canaliculata]
TRINITY_DN17243_c0_g1_i3	0.794108	0.00608127	CAG2241626.1 4CL [Mytilus edulis]
TRINITY_DN115825_c0_g1_i1	0.793185	0.0061837	CAC5391775.1 RP-S19e [Mytilus coruscus]
TRINITY_DN2346_c1_g1_i13	0.793083	0.00619503	VDI20100.1 dynein assembly factor 2, axonemal, partial [Mytilus galloprovincialis]
TRINITY_DN54163_c0_g1_i2	0.792965	0.00620823	CAG2239948.1 ATP12 [Mytilus edulis]
TRINITY_DN23413_c0_g1_i9	0.792038	0.00631261	CAC5399043.1 PSMD3 [Mytilus coruscus]
TRINITY_DN304409_c0_g1_i1	0.7919	0.00632824	CAG2184580.1 Aldehyde dehydrogenase family 3 member B3,Aldehyde dehydrogenase,Aldehyde dehydrogenase family 3 member B2,Fatty aldehyde dehydrogenase,Aldehyde dehydrogenase family 3 member B1,Putative aldehyde dehydrogenase YwdH,Aldehyde dehydrogenase, dimeric NADP-preferring,Aldehyde dehydrogenase family 3 comG,4,4'-diaponeurosporen-aldehyde dehydrogenase,Aldehyde dehydrogenase family 3 member H1…
TRINITY_DN361887_c0_g1_i1	0.791897	0.00632863	VDI08937.1 small subunit ribosomal protein S17e [Mytilus galloprovincialis]
TRINITY_DN128024_c0_g1_i2	0.791662	0.00635527	VDI78286.1 mediator of RNA polymerase II transcription subunit 11 [Mytilus galloprovincialis]
TRINITY_DN148610_c0_g1_i6	0.791484	0.00637561	VDI81443.1 methylosome protein 50 [Mytilus galloprovincialis]
TRINITY_DN114088_c0_g1_i1	0.791344	0.00639156	CAG2196397.1 ENDOG [Mytilus edulis]
TRINITY_DN52424_c0_g1_i1	0.79129	0.00639773	AKQ70855.1 shell fibrous prismatic cathepsin-like protein 1, partial [Mytilus galloprovincialis]
TRINITY_DN50688_c0_g1_i5	0.791101	0.00641939	VDI37170.1 neuromedin U receptor 1 [Mytilus galloprovincialis]
TRINITY_DN144749_c0_g1_i1	0.79063	0.00647342	VDI79024.1 template-activating factor I [Mytilus galloprovincialis]
TRINITY_DN245075_c1_g1_i1	0.790088	0.00653616	AUE21888.1 alpha tubulin, partial [Uncaria rhynchophylla]
TRINITY_DN5887_c3_g1_i10	0.790087	0.00653626	VDI71709.1 fucokinase [Mytilus galloprovincialis]
TRINITY_DN92456_c0_g1_i2	0.789516	0.00660279	CAG2230675.1 E4.1.1.32 [Mytilus edulis]
TRINITY_DN49136_c1_g1_i1	0.789433	0.00661251	CAG2198714.1 FUT1_2 [Mytilus edulis]
TRINITY_DN355949_c0_g1_i1	0.789097	0.00665188	VDI37434.1 large subunit ribosomal protein L35e [Mytilus galloprovincialis]
TRINITY_DN2409_c0_g1_i8	0.787734	0.00681344	CAG2255041.1 EIF2AK4 [Mytilus edulis]
TRINITY_DN13593_c0_g1_i18	0.787421	0.00685089	CAG2232862.1 PON [Mytilus edulis]
TRINITY_DN87720_c0_g1_i1	0.787316	0.00686351	CAG2206904.1 TRAK1 [Mytilus edulis]
TRINITY_DN4194_c0_g1_i14	0.787195	0.00687807	CAG2250275.1 ATF3 [Mytilus edulis]
TRINITY_DN257070_c1_g1_i1	0.78712	0.00688709	CAC5369669.1 RP-L4e [Mytilus coruscus]
TRINITY_DN88377_c0_g1_i1	0.786538	0.00695753	VDI40021.1 autophagy-related protein 2, partial [Mytilus galloprovincialis]
TRINITY_DN43920_c0_g1_i4	0.7865	0.00696208	CAG2247286.1 TRIM56 [Mytilus edulis]
TRINITY_DN61128_c0_g1_i19	0.786162	0.00700321	VDI17009.1 proteasome assembly chaperone 1 [Mytilus galloprovincialis]
TRINITY_DN217031_c0_g1_i5	0.785174	0.00712431	CAG2235474.1 Actin, cytoplasmic type 5,Actin, cytoskeletal 4,Actin, cytoplasmic A3,Actin, muscle-type,Actin-75,Actin-like protein 53D,Putative actin-24,Actin, non-muscle 6.2,Actin-like protein 9,Actin-71,Actin-4,Actin, nonmuscle,Actin, alpha skeletal muscle 2,Actin, cytoskeletal 2A,Actin B,Actin-11,Actin-15A,Actin, cytoplasmic type 8,Actin, cytoplasmic 2,Actin, cytoplasmic 1,Actin-like protein 7B…
TRINITY_DN12936_c0_g1_i3	0.784775	0.00717371	CAC5409197.1 MOSMO [Mytilus coruscus]
TRINITY_DN96916_c0_g1_i1	0.784774	0.0071738	CAG2247309.1 U2AF2 [Mytilus edulis]
TRINITY_DN236647_c0_g1_i1	0.783614	0.00731868	CAC5413213.1 MYO7A [Mytilus coruscus]
TRINITY_DN64614_c0_g1_i5	0.783453	0.00733899	CAG2242897.1 THBS2S [Mytilus edulis]
TRINITY_DN62798_c1_g1_i1	0.783038	0.00739135	VDI05050.1 Y-box-binding protein 1, partial [Mytilus galloprovincialis]
TRINITY_DN4834_c6_g1_i1	0.783034	0.0073919	CAC5398573.1 COMMD5 [Mytilus coruscus]
TRINITY_DN200698_c0_g3_i1	0.782859	0.00741408	VDI34473.1 coiled-coil and C2 domain-containing protein 1 [Mytilus galloprovincialis]
TRINITY_DN3556_c0_g1_i13	0.782461	0.00746465	VDI38803.1 translation initiation factor 1A [Mytilus galloprovincialis]
TRINITY_DN16355_c0_g1_i1	0.782297	0.00748567	CAC5360122.1 RP-S18 [Mytilus coruscus]
TRINITY_DN376943_c0_g1_i1	0.782251	0.00749151	CAG2190052.1 GLD2 [Mytilus edulis]
TRINITY_DN131263_c0_g1_i1	0.781369	0.00760486	CAC5397826.1 TGM1 [Mytilus coruscus]
TRINITY_DN52346_c3_g1_i1	0.780932	0.00766155	CAC5383057.1 LRP4 [Mytilus coruscus]
TRINITY_DN227290_c0_g1_i2	0.780694	0.00769245	VDI31899.1 alkylated DNA repair protein alkB homolog 4 [Mytilus galloprovincialis]
TRINITY_DN25483_c0_g1_i2	0.780668	0.00769592	VDH96149.1 BTB/POZ domain-containing protein 3/6 [Mytilus galloprovincialis]
TRINITY_DN8860_c0_g1_i12	0.780317	0.00774167	VDH96527.1 sulfide:quinone oxidoreductase [Mytilus galloprovincialis]
TRINITY_DN53677_c0_g1_i10	0.780228	0.00775341	GBM45931.1 Serine/threonine-protein phosphatase 6 catalytic subunit [Araneus ventricosus]
TRINITY_DN146230_c0_g1_i4	0.779999	0.00778343	CAG2217539.1 inx [Mytilus edulis]
TRINITY_DN14671_c1_g1_i15	0.779435	0.00785776	CAG2255332.1 MLX [Mytilus edulis]
TRINITY_DN674_c0_g1_i1	0.779405	0.00786166	CAG2216542.1 Transmembrane protein 104 homolog,Transmembrane protein 104 [Mytilus edulis]
TRINITY_DN170131_c0_g1_i2	0.779395	0.00786304	ABA02195.1 arginyl aminopeptidase B, partial [Mytilus edulis]
TRINITY_DN250483_c0_g1_i14	0.779257	0.00788132	CAG2242376.1 POLK [Mytilus edulis]
TRINITY_DN58952_c0_g1_i7	0.779142	0.00789654	VDI72337.1 glutamate receptor, ionotropic, invertebrate [Mytilus galloprovincialis]
TRINITY_DN33335_c0_g1_i1	0.778995	0.00791611	VDI64605.1 large subunit ribosomal protein L15e [Mytilus galloprovincialis]
TRINITY_DN2232_c6_g1_i3	0.778787	0.00794377	VDI82231.1 metal transporter CNNM [Mytilus galloprovincialis]
TRINITY_DN80698_c0_g3_i1	0.778752	0.00794847	VDI75198.1 uncharacterized protein MGAL_10B084819 [Mytilus galloprovincialis]
TRINITY_DN182742_c1_g1_i1	0.778548	0.00797568	CAG2251625.1 CRYAB [Mytilus edulis]
TRINITY_DN31856_c0_g1_i18	0.778483	0.00798439	CAC5383407.1 HGD [Mytilus coruscus]
TRINITY_DN13882_c0_g1_i2	0.777623	0.00809995	VDH91226.1 aryl hydrocarbon receptor nuclear translocator-like protein 1 [Mytilus galloprovincialis]
TRINITY_DN9473_c3_g1_i3	0.777599	0.00810328	VDH91997.1 U2-associated protein SR140 [Mytilus galloprovincialis]
TRINITY_DN42800_c0_g1_i2	0.777509	0.00811534	VDI73988.1 solute carrier organic anion transporter family, member 4A [Mytilus galloprovincialis]
TRINITY_DN140022_c0_g1_i1	0.7775	0.0081166	YP_009407583.1 NADH dehydrogenase subunit 3 [Gigantidas platifrons]
TRINITY_DN37470_c0_g1_i1	0.77735	0.00813699	CAG2222270.1 LCMT2 [Mytilus edulis]
TRINITY_DN60179_c0_g1_i2	0.777338	0.0081385	AHG59339.1 Mytimacin-6 [Mytilus galloprovincialis]
TRINITY_DN346926_c0_g1_i1	0.776679	0.0082283	XP_046561626.1 60S ribosomal protein L38 [Haliotis rubra]
TRINITY_DN17529_c0_g1_i9	0.776545	0.00824654	XP_022293654.1 polycomb protein EED-like [Crassostrea virginica]
TRINITY_DN331738_c0_g1_i1	0.776495	0.0082534	XP_045122047.1 cytochrome c oxidase subunit NDUFA4-like [Portunus trituberculatus]
TRINITY_DN195101_c0_g1_i1	0.776376	0.00826967	CAG2213166.1 ISWI [Mytilus edulis]
TRINITY_DN146865_c0_g1_i3	0.776204	0.00829333	XP_022299707.1 A disintegrin and metalloproteinase with thrombospondin motifs adt-1-like isoform X4 [Crassostrea virginica]
TRINITY_DN16966_c0_g2_i1	0.776136	0.0083027	VDI29767.1 kinesin family member 1, partial [Mytilus galloprovincialis]
TRINITY_DN131913_c0_g1_i1	0.775169	0.00843642	VDI60899.1 solute carrier family 39 (zinc transporter), member 12 [Mytilus galloprovincialis]
TRINITY_DN394544_c0_g1_i1	0.775139	0.00844059	ABX44817.1 putative 60S ribosomal protein RPL14 [Flustra foliacea]
TRINITY_DN17889_c0_g1_i4	0.774719	0.00849917	CAG2234112.1 Cell cycle checkpoint control protein RAD9B,Cell cycle checkpoint control protein RAD9A [Mytilus edulis]
TRINITY_DN3399_c0_g1_i78	0.774511	0.00852831	VDI30689.1 galactoside 2-L-fucosyltransferase 1/2 [Mytilus galloprovincialis]
TRINITY_DN14388_c0_g1_i6	0.774421	0.00854093	CAG2219094.1 CD349_50 [Mytilus edulis]
TRINITY_DN1368_c0_g1_i3	0.774093	0.00858696	CAG2191801.1 TM2 domain-containing protein CG11103,TM2 domain-containing protein C02F5.13,TM2 domain-containing protein 2 [Mytilus edulis]
TRINITY_DN55650_c0_g1_i2	0.774063	0.00859125	CAC5413618.1 CUBN [Mytilus coruscus]
TRINITY_DN44117_c0_g1_i23	0.773736	0.00863734	CAC5402349.1 prlC [Mytilus coruscus]
TRINITY_DN16916_c0_g1_i8	0.773729	0.00863837	VDI02435.1 glutathione S-transferase [Mytilus galloprovincialis]
TRINITY_DN2031_c0_g2_i1	0.77371	0.00864097	OPL33174.1 phosphatidylcholine protein transfer, partial [Mytilus galloprovincialis]
TRINITY_DN295693_c0_g1_i1	0.77364	0.00865099	XP_035669538.1 protein cornichon homolog 4-like isoform X2 [Branchiostoma floridae]
TRINITY_DN234702_c0_g1_i1	0.773446	0.00867846	XP_045198070.1 cystatin-B-like [Mercenaria mercenaria]
TRINITY_DN187334_c0_g1_i6	0.773127	0.00872373	CAG2225561.1 C1QL [Mytilus edulis]
TRINITY_DN192847_c1_g1_i7	0.772979	0.00874482	VDI75704.1 sulfide:quinone oxidoreductase [Mytilus galloprovincialis]
TRINITY_DN1394_c0_g1_i21	0.772964	0.00874707	CAG2236613.1 POLR3G [Mytilus edulis]
TRINITY_DN24251_c0_g1_i13	0.772273	0.00884603	CAG2224288.1 STOM [Mytilus edulis]
TRINITY_DN71630_c0_g1_i3	0.771963	0.00889066	CAG2238442.1 UAF1 [Mytilus edulis]
TRINITY_DN51734_c0_g1_i1	0.771884	0.00890209	VDI39106.1 solute carrier organic anion transporter family, member 4A, partial [Mytilus galloprovincialis]
TRINITY_DN22904_c0_g1_i2	0.771825	0.00891053	CAG2223847.1 Alternative oxidase, mitochondrial,Ubiquinol oxidase 1c, mitochondrial,Ubiquinol oxidase 1, mitochondrial,Alternative oxidase 3, mitochondrial,Alternative oxidase 1, mitochondrial,Ubiquinol oxidase 2, mitochondrial,Ubiquinol oxidase 1a, mitochondrial,Ubiquinol oxidase 3, mitochondrial,Alternative oxidase 2, mitochondrial,Ubiquinol oxidase, mitochondrial,Ubiquinol oxidase 1b, mitochon…
TRINITY_DN340622_c0_g1_i1	0.770888	0.00904678	CAG2257375.1 Receptor-type guanylate cyclase gcy-9,Receptor-type guanylate cyclase gcy-7,Receptor-type guanylate cyclase gcy-22,Receptor-type guanylate cyclase gcy-11,Guanylyl cyclase GC-E,Receptor-type guanylate cyclase gcy-17,Retinal guanylyl cyclase 1,Receptor-type guanylate cyclase gcy-12,Receptor-type guanylate cyclase daf-11,Guanylate cyclase 2G,Olfactory guanylyl cyclase GC-D,Receptor-type…
TRINITY_DN145648_c0_g1_i5	0.77042	0.0091153	QWF36722.1 deiodinase Y [Mytilus coruscus]
TRINITY_DN6607_c0_g1_i4	0.769453	0.0092581	VDI68812.1 adenosine receptor A2a [Mytilus galloprovincialis]
TRINITY_DN4101_c2_g1_i2	0.769449	0.00925871	VDI25352.1 guanine nucleotide-binding protein subunit beta-5 [Mytilus galloprovincialis]
TRINITY_DN103721_c2_g1_i1	0.768943	0.00933411	XP_045185313.1 uncharacterized protein LOC123543300 [Mercenaria mercenaria]
TRINITY_DN316770_c0_g1_i1	0.768289	0.00943213	CAC5393997.1 CALR [Mytilus coruscus]
TRINITY_DN109198_c0_g1_i1	0.767284	0.00958423	VDI54451.1 hemicentin [Mytilus galloprovincialis]
TRINITY_DN350128_c0_g1_i1	0.767184	0.0095994	ABX44833.1 putative 60S ribosomal protein RPL30 [Flustra foliacea]
TRINITY_DN99027_c0_g1_i1	0.767139	0.00960624	CAC5400419.1 TLR3 [Mytilus coruscus]
TRINITY_DN7948_c0_g1_i9	0.76694	0.0096366	CAG2195997.1 ABC1 [Mytilus edulis]
TRINITY_DN92028_c0_g1_i1	0.766857	0.0096494	CAG2201055.1 DMBT1 [Mytilus edulis]
TRINITY_DN199394_c1_g1_i1	0.766804	0.0096574	CAG2255737.1 M6PR [Mytilus edulis]
TRINITY_DN27610_c0_g2_i14	0.766756	0.00966485	CAC5403909.1 PAIP1 [Mytilus coruscus]
TRINITY_DN40762_c0_g1_i1	0.766404	0.00971876	ACR24967.1 ribosomal protein S16, partial [Lepidochitona cinerea]
TRINITY_DN146748_c0_g2_i1	0.766372	0.00972372	OPL33122.1 insulin receptor-like, partial [Mytilus galloprovincialis]
TRINITY_DN10346_c0_g1_i5	0.76617	0.00975474	CAG2257943.1 NCUBE2 [Mytilus edulis]
TRINITY_DN95143_c0_g1_i8	0.766153	0.00975744	CAG2247783.1 SFRP5 [Mytilus edulis]
TRINITY_DN3215_c1_g1_i15	0.766121	0.00976229	CAC5407340.1 4-hydroxybutyrate coenzyme A transferase [Mytilus coruscus]
TRINITY_DN12061_c0_g1_i3	0.76609	0.00976706	VDI49957.1 DNA excision repair protein ERCC-8 [Mytilus galloprovincialis]
TRINITY_DN38806_c0_g2_i1	0.765907	0.0097954	ATA66763.1 Pol [Haliotis discus hannai]
TRINITY_DN16885_c0_g1_i2	0.765902	0.00979613	CAC5384386.1 rlmE [Mytilus coruscus]
TRINITY_DN786_c9_g1_i2	0.765901	0.00979623	VDH97665.1 F-BAR and double SH3 domains protein [Mytilus galloprovincialis]
TRINITY_DN11078_c0_g2_i1	0.765885	0.00979885	AGK88245.1 p53 and DNA damage regulated protein [Mytilus galloprovincialis]
TRINITY_DN18604_c0_g2_i2	0.765127	0.0099165	VDI67082.1 beta-1,3-galactosyltransferase 1 [Mytilus galloprovincialis]
TRINITY_DN22884_c0_g1_i1	0.764885	0.00995426	VDH95304.1 large subunit ribosomal protein L30e [Mytilus galloprovincialis]
TRINITY_DN202178_c0_g1_i1	0.764778	0.00997097	VDH99754.1 metaxin [Mytilus galloprovincialis]
TRINITY_DN14798_c0_g1_i16	0.764727	0.00997891	VDI83703.1 tankyrase [Mytilus galloprovincialis]
TRINITY_DN16308_c0_g1_i3	0.764724	0.00997934	CAG2188828.1 RGLG [Mytilus edulis]
TRINITY_DN5841_c1_g1_i13	0.764633	0.00999373	VDI41470.1 protein phosphatase 1E [Mytilus galloprovincialis]
TRINITY_DN12420_c0_g1_i2	0.764024	0.0100895	VDI22840.1 dihydrolipoamide dehydrogenase [Mytilus galloprovincialis]
TRINITY_DN117458_c0_g1_i2	0.763841	0.0101184	CAG2208947.1 DRD1 [Mytilus edulis]
TRINITY_DN28946_c0_g1_i7	0.763743	0.0101338	CAG2214568.1 MRPL48 [Mytilus edulis]
TRINITY_DN379391_c0_g1_i1	0.763739	0.0101345	CAG2224674.1 FADS2 [Mytilus edulis]
TRINITY_DN370407_c0_g1_i1	0.763429	0.0101836	XP_035630321.1 N-alpha-acetyltransferase 20-like isoform X1 [Oncorhynchus keta]
TRINITY_DN191528_c0_g3_i1	0.763201	0.0102198	CAG2206200.1 B3GALT1 [Mytilus edulis]
TRINITY_DN84731_c0_g1_i1	0.762942	0.0102611	KAF6016389.1 RpS19a [Bugula neritina]
TRINITY_DN120275_c0_g1_i1	0.762811	0.0102822	ACO11607.1 40S ribosomal protein S15Aa [Caligus rogercresseyi]
TRINITY_DN67118_c0_g1_i2	0.762704	0.0102992	OPL33489.1 receptor-type kappa tyrosine-protein phosphatase, partial [Mytilus galloprovincialis]
TRINITY_DN8705_c0_g1_i9	0.762679	0.0103033	CAG2196647.1 FBXO30 [Mytilus edulis]
TRINITY_DN106450_c0_g1_i14	0.762079	0.0103997	VDI02256.1 17beta-estradiol 17-dehydrogenase / 3alpha(17beta)-hydroxysteroid dehydrogenase (NAD+) [Mytilus galloprovincialis]
TRINITY_DN77322_c0_g1_i1	0.762024	0.0104086	CAG2188778.1 TRIM71 [Mytilus edulis]
TRINITY_DN4619_c1_g1_i1	0.761784	0.0104473	CAG2203793.1 IFT46 [Mytilus edulis]
TRINITY_DN2079_c0_g1_i4	0.761356	0.0105166	VDI64222.1 cytochrome P450, family 4, subfamily F, polypeptide 22 [Mytilus galloprovincialis]
TRINITY_DN104936_c0_g1_i1	0.761323	0.0105219	CAG2223950.1 EEF2 [Mytilus edulis]
TRINITY_DN212745_c0_g3_i1	0.760774	0.0106114	ABX44845.1 ubiquinated putative 60S ribosomal protein RPL40 [Flustra foliacea]
TRINITY_DN1133_c0_g1_i1	0.760237	0.0106996	YP_009407577.1 cytochrome b [Gigantidas platifrons]
TRINITY_DN175012_c0_g1_i1	0.75961	0.010803	CAG2200993.1 ALS2 [Mytilus edulis]
TRINITY_DN156987_c0_g3_i1	0.758376	0.0110087	CAC5413763.1 Perlucin-like protein [Mytilus coruscus]
TRINITY_DN46046_c0_g1_i12	0.757694	0.0111235	CAG2209407.1 LYS5 [Mytilus edulis]
TRINITY_DN4991_c6_g1_i5	0.757608	0.0111379	CAG2235944.1 LKAP [Mytilus edulis]
TRINITY_DN35950_c0_g1_i8	0.757509	0.0111547	VDI67349.1 DNA polymerase mu [Mytilus galloprovincialis]
TRINITY_DN202685_c0_g1_i1	0.757258	0.0111974	VDI79025.1 template-activating factor I [Mytilus galloprovincialis]
TRINITY_DN14128_c0_g2_i1	0.757041	0.0112343	OPL33122.1 insulin receptor-like, partial [Mytilus galloprovincialis]
TRINITY_DN14539_c0_g1_i1	0.756892	0.0112596	VDI14622.1 F-box protein 39 [Mytilus galloprovincialis]
TRINITY_DN1869_c0_g1_i1	0.756794	0.0112763	CAC5395989.1 FBXW4 [Mytilus coruscus]
TRINITY_DN123612_c0_g1_i1	0.756716	0.0112896	VDI22440.1 collagen, type VI, alpha [Mytilus galloprovincialis]
TRINITY_DN14651_c0_g1_i10	0.756531	0.0113212	VDI67671.1 solute carrier family 26 (sulfate anion transporter), member 2 [Mytilus galloprovincialis]
TRINITY_DN11866_c1_g2_i2	0.756432	0.0113381	CAG2229643.1 MITA [Mytilus edulis]
TRINITY_DN4504_c6_g1_i1	0.756423	0.0113397	VDI78293.1 autophagy-related protein 16, animal type [Mytilus galloprovincialis]
TRINITY_DN109132_c0_g1_i1	0.756251	0.0113692	CAC5393487.1 Plexin domain-containing protein 2,Plexin domain-containing protein 1 [Mytilus coruscus]
TRINITY_DN289752_c0_g1_i1	0.756006	0.0114112	VDI67660.1 galectin-9 [Mytilus galloprovincialis]
TRINITY_DN126231_c0_g1_i3	0.755555	0.011489	CAG2199093.1 ARMS [Mytilus edulis]
TRINITY_DN245420_c0_g1_i1	0.755387	0.0115182	CAG2217866.1 tatD [Mytilus edulis]
TRINITY_DN240193_c0_g1_i1	0.75526	0.0115402	VDI76865.1 hemicentin [Mytilus galloprovincialis]
TRINITY_DN223521_c0_g1_i7	0.754985	0.0115879	CAG2209006.1 FUK [Mytilus edulis]
TRINITY_DN67223_c2_g1_i1	0.754983	0.0115883	VDI37130.1 large subunit ribosomal protein L37Ae [Mytilus galloprovincialis]
TRINITY_DN108182_c0_g1_i1	0.754925	0.0115984	CAC5383057.1 LRP4 [Mytilus coruscus]
TRINITY_DN72682_c0_g2_i1	0.754912	0.0116006	CAC5382603.1 ACLY [Mytilus coruscus]
TRINITY_DN168421_c0_g1_i1	0.754731	0.0116321	VDI48346.1 solute carrier family 23 (nucleobase transporter), member 1/2 [Mytilus galloprovincialis]
TRINITY_DN370444_c0_g1_i1	0.754707	0.0116364	CAC5410755.1 CS [Mytilus coruscus]
TRINITY_DN38998_c0_g1_i14	0.754643	0.0116475	VDI40346.1 prolyl-tRNA synthetase [Mytilus galloprovincialis]
TRINITY_DN2467_c0_g1_i6	0.754099	0.0117428	VDH91809.1 cytochrome c heme-lyase [Mytilus galloprovincialis]
TRINITY_DN101691_c1_g1_i1	0.753957	0.0117677	VDI55243.1 E3 ubiquitin-protein ligase RNF103 [Mytilus galloprovincialis]
TRINITY_DN38564_c0_g1_i1	0.753804	0.0117946	VDI19242.1 Rad and Gem related GTP binding protein 1 [Mytilus galloprovincialis]
TRINITY_DN25072_c0_g1_i5	0.753644	0.0118227	VDI24190.1 glycogen debranching enzyme [Mytilus galloprovincialis]
TRINITY_DN3822_c1_g1_i12	0.753509	0.0118466	VDI04394.1 McKusick-Kaufman syndrome protein [Mytilus galloprovincialis]
TRINITY_DN64966_c0_g1_i2	0.753404	0.0118652	CAC5395179.1 SULT1 [Mytilus coruscus]
TRINITY_DN15322_c0_g1_i1	0.753392	0.0118673	VDI17404.1 corin [Mytilus galloprovincialis]
TRINITY_DN36327_c0_g1_i2	0.753367	0.0118717	CAG2195369.1 K07023 [Mytilus edulis]
TRINITY_DN181966_c0_g1_i5	0.753303	0.0118831	CAC5388531.1 SLC13A2_3_5 [Mytilus coruscus]
TRINITY_DN16005_c0_g1_i11	0.753252	0.0118921	AKM49942.1 MgIL17Rb [Mytilus galloprovincialis]
TRINITY_DN87311_c0_g1_i5	0.753239	0.0118944	WP_202763777.1 reverse transcriptase domain-containing protein [Bathymodiolus brooksi thiotrophic gill symbiont]
TRINITY_DN287572_c0_g1_i1	0.753226	0.0118967	ACO50120.1 elongation factor 1 alpha-like protein, partial [Rhynchopus euleeides]
TRINITY_DN122810_c1_g1_i1	0.752977	0.0119408	VDI31495.1 ATP-dependent RNA helicase DDX58 [Mytilus galloprovincialis]
TRINITY_DN108538_c0_g1_i1	0.75277	0.0119777	CAG2238028.1 CHX10 [Mytilus edulis]
TRINITY_DN52616_c0_g1_i1	0.752558	0.0120155	CAG2194892.1 Ficolin-1-A,Ryncolin-1,Fibrinogen C domain-containing protein 1,Tenascin-N,Angiopoietin-related protein 7,Ficolin-3,Fibrinogen C domain-containing protein 1-B,Fibrinogen-like protein 1,Ficolin-1,Ficolin-1-B,Tenascin-R,Ryncolin-2,Fibrinogen C domain-containing protein 1-A,Microfibril-associated glycoprotein 4,Fibrinogen-like protein A,Ryncolin-3,Ficolin-2,Tenascin,Ryncolin-4,Techylect…
TRINITY_DN83084_c0_g1_i11	0.752147	0.0120889	CAC5414354.1 Enoyl-CoA hydratase domain-containing protein 3, mitochondrial [Mytilus coruscus]
TRINITY_DN171693_c0_g1_i1	0.751792	0.0121525	VDI37998.1 heterogeneous nuclear ribonucleoprotein R [Mytilus galloprovincialis]
TRINITY_DN4013_c0_g1_i4	0.751574	0.0121918	CAG2185211.1 anmK [Mytilus edulis]
TRINITY_DN49085_c0_g2_i1	0.751532	0.0121994	CAC5374912.1 IDH1 [Mytilus coruscus]
TRINITY_DN12910_c0_g1_i7	0.751528	0.0122001	CAC5394651.1 TROVE2 [Mytilus coruscus]
TRINITY_DN166145_c0_g1_i1	0.751306	0.0122402	CAC5386934.1 Macrophage-expressed gene 1 protein [Mytilus coruscus]
TRINITY_DN1468_c0_g1_i1	0.751271	0.0122465	ABK26259.1 unknown [Picea sitchensis]
TRINITY_DN30152_c0_g1_i1	0.75126	0.0122486	VDI63735.1 large subunit ribosomal protein L5e [Mytilus galloprovincialis]
TRINITY_DN84961_c0_g1_i2	0.751138	0.0122707	CAG2204465.1 TRIM2_3 [Mytilus edulis]
TRINITY_DN25725_c0_g1_i1	0.751125	0.012273	VDI05117.1 bHLH factor, other [Mytilus galloprovincialis]
TRINITY_DN16906_c0_g1_i6	0.751103	0.012277	CAG2220069.1 TUBA [Mytilus edulis]
TRINITY_DN17822_c0_g1_i15	0.75038	0.0124084	CAG2229727.1 RNF180 [Mytilus edulis]
TRINITY_DN224331_c0_g2_i1	0.750286	0.0124255	VDI36752.1 fatty-acyl-CoA synthase, partial [Mytilus galloprovincialis]
TRINITY_DN9338_c1_g2_i1	0.750206	0.0124402	CAG2203563.1 RP-L36e [Mytilus edulis]
TRINITY_DN274345_c0_g1_i3	0.750174	0.012446	CAG2211544.1 PTPRT [Mytilus edulis]
TRINITY_DN25668_c0_g1_i15	0.749712	0.0125308	CAC5414830.1 CALM [Mytilus coruscus]
TRINITY_DN10388_c0_g2_i5	0.749675	0.0125376	CAC5409473.1 FBXL13 [Mytilus coruscus]
TRINITY_DN5345_c0_g1_i1	0.749273	0.0126116	VDI77295.1 reelin [Mytilus galloprovincialis]
TRINITY_DN62896_c1_g1_i1	0.748993	0.0126633	CAC5414402.1 ADPRH [Mytilus coruscus]
TRINITY_DN134780_c0_g1_i1	0.748773	0.0127041	CAG2208031.1 PCDHD1 [Mytilus edulis]
TRINITY_DN12013_c0_g2_i1	0.748497	0.0127554	VDI47574.1 FK506-binding protein 1 [Mytilus galloprovincialis]
TRINITY_DN112477_c0_g2_i1	0.748101	0.0128292	CAG2230544.1 SLC28A [Mytilus edulis]
TRINITY_DN98786_c0_g1_i1	0.747886	0.0128693	CAG2255110.1 PDE3A [Mytilus edulis]
TRINITY_DN88694_c0_g1_i1	0.747769	0.0128912	VDI06515.1 fatty-acyl-CoA synthase [Mytilus galloprovincialis]
TRINITY_DN89553_c0_g1_i3	0.747725	0.0128994	VDI75478.1 ceramide kinase [Mytilus galloprovincialis]
TRINITY_DN42942_c0_g1_i3	0.747403	0.01296	VDI84165.1 blast:Zinc finger protein 112 [Mytilus galloprovincialis]
TRINITY_DN62450_c0_g1_i1	0.747288	0.0129817	CAC5399142.1 TRIM56 [Mytilus coruscus]
TRINITY_DN243189_c0_g1_i1	0.746883	0.0130581	CAC5408899.1 PARP10_14_15 [Mytilus coruscus]
TRINITY_DN1260_c4_g1_i16	0.746422	0.0131454	CAC5409263.1 F8A [Mytilus coruscus]
TRINITY_DN29240_c0_g1_i14	0.746398	0.01315	CAC5357062.1 NVD [Mytilus coruscus]
TRINITY_DN21668_c0_g1_i1	0.746368	0.0131557	CAG2243672.1 RP-S24e [Mytilus edulis]
TRINITY_DN79894_c0_g1_i4	0.745685	0.013286	VDI16854.1 peptidylamidoglycolate lyase [Mytilus galloprovincialis]
TRINITY_DN15159_c0_g1_i2	0.745393	0.013342	VDI03756.1 ectonucleotide pyrophosphatase/phosphodiesterase family member 5 [Mytilus galloprovincialis]
TRINITY_DN17685_c0_g1_i1	0.745275	0.0133646	CAC5425394.1 AP5Z1 [Mytilus coruscus]
TRINITY_DN232527_c0_g1_i2	0.745056	0.0134068	CAG2238771.1 E3.1.3.1 [Mytilus edulis]
TRINITY_DN6883_c0_g1_i2	0.74485	0.0134465	XP_021342803.1 uncharacterized protein LOC110443125 [Mizuhopecten yessoensis]
TRINITY_DN210962_c0_g1_i1	0.744715	0.0134725	WP_139476280.1 reverse transcriptase family protein, partial [Bathymodiolus brooksi thiotrophic gill symbiont]
TRINITY_DN5941_c0_g1_i11	0.744705	0.0134745	VDI32990.1 glucosamine-6-phosphate deaminase [Mytilus galloprovincialis]
TRINITY_DN3791_c0_g1_i5	0.744447	0.0135245	CAC5425914.1 FBXW5 [Mytilus coruscus]
TRINITY_DN297883_c0_g1_i1	0.74434	0.0135453	VDI21337.1 heterogeneous nuclear ribonucleoprotein G [Mytilus galloprovincialis]
TRINITY_DN4285_c0_g1_i6	0.744214	0.0135697	WP_180337622.1 reverse transcriptase family protein [Bathymodiolus brooksi thiotrophic gill symbiont]
TRINITY_DN142074_c0_g1_i1	0.743815	0.0136473	CAC5405703.1 MCFD2 [Mytilus coruscus]
TRINITY_DN19444_c0_g1_i5	0.743629	0.0136835	VDI37885.1 solute carrier family 5 (sodium-coupled monocarboxylate transporter), member 8/12 [Mytilus galloprovincialis]
TRINITY_DN10225_c0_g1_i39	0.743563	0.0136966	CAC5397378.1 OXSR1 [Mytilus coruscus]
TRINITY_DN1703_c0_g1_i9	0.743407	0.013727	VDI73828.1 eyes absent homolog 4 [Mytilus galloprovincialis]
TRINITY_DN35306_c0_g1_i2	0.743381	0.0137322	NXP58960.1 TM222 protein [Chloropsis cyanopogon]
TRINITY_DN8492_c0_g1_i1	0.743374	0.0137336	CAG2230839.1 PRODH [Mytilus edulis]
TRINITY_DN76107_c0_g1_i14	0.742725	0.013861	CAG2209820.1 BLOC1S5 [Mytilus edulis]
TRINITY_DN88417_c0_g2_i4	0.742454	0.0139145	CAG2241096.1 KRAB [Mytilus edulis]
TRINITY_DN61709_c0_g2_i2	0.742353	0.0139346	CAG2224674.1 FADS2 [Mytilus edulis]
TRINITY_DN171846_c0_g1_i5	0.741931	0.0140183	OPL21202.1 translation mitochondrial factor, partial [Mytilus galloprovincialis]
TRINITY_DN21510_c0_g1_i5	0.741863	0.0140317	CAG2205392.1 NUS1 [Mytilus edulis]
TRINITY_DN36868_c0_g1_i18	0.741683	0.0140676	CAC5419308.1 CYP4B1 [Mytilus coruscus]
TRINITY_DN193503_c0_g1_i1	0.741664	0.0140713	VDI04129.1 collagen, type VI, alpha [Mytilus galloprovincialis]
TRINITY_DN121881_c0_g1_i1	0.741231	0.0141578	YP_009407584.1 ATP synthase F0 subunit 6 [Gigantidas platifrons]
TRINITY_DN236257_c1_g1_i1	0.74117	0.0141701	CAG2213030.1 SLK [Mytilus edulis]
TRINITY_DN6278_c2_g1_i6	0.741146	0.0141748	VDI79799.1 parathyroid hormone receptor 1 [Mytilus galloprovincialis]
TRINITY_DN16008_c0_g1_i1	0.740484	0.0143078	VDI60797.1 latrophilin 3 [Mytilus galloprovincialis]
TRINITY_DN24009_c0_g1_i1	0.74036	0.0143329	EDO30156.1 predicted protein [Nematostella vectensis]
TRINITY_DN12261_c0_g2_i1	0.739386	0.0145304	CAC5360722.1 RP-L8e [Mytilus coruscus]
TRINITY_DN98184_c1_g1_i1	0.739317	0.0145445	XP_022310958.1 ornithine decarboxylase antizyme 3-like [Crassostrea virginica]
TRINITY_DN45707_c4_g1_i1	0.739284	0.0145512	VDI78293.1 autophagy-related protein 16, animal type [Mytilus galloprovincialis]
TRINITY_DN12880_c4_g1_i1	0.739184	0.0145716	VDI73386.1 F-box and leucine-rich repeat protein 8 [Mytilus galloprovincialis]
TRINITY_DN10847_c1_g1_i1	0.739066	0.0145957	VDI79934.1 type I thyroxine 5'-deiodinase [Mytilus galloprovincialis]
TRINITY_DN156071_c0_g1_i4	0.738945	0.0146205	CAG2196647.1 FBXO30 [Mytilus edulis]
TRINITY_DN14918_c0_g1_i6	0.738387	0.014735	VDI27723.1 L-fucose mutarotase [Mytilus galloprovincialis]
TRINITY_DN78911_c0_g1_i1	0.738095	0.014795	CAG2208479.1 RNASEH1 [Mytilus edulis]
TRINITY_DN302389_c0_g1_i1	0.737854	0.0148448	CAG2204865.1 SLC13A2_3_5 [Mytilus edulis]
TRINITY_DN928_c0_g1_i6	0.737352	0.014949	VDI29199.1 lysyl hydroxylase/galactosyltransferase/glucosyltransferase [Mytilus galloprovincialis]
TRINITY_DN311955_c0_g1_i1	0.736751	0.0150743	CAC5404216.1 SLC25A3 [Mytilus coruscus]
TRINITY_DN22639_c0_g1_i1	0.736661	0.0150931	VDH99075.1 MFS transporter, MCP family, solute carrier family 16 (monocarboxylic acid transporters), member 12 [Mytilus galloprovincialis]
TRINITY_DN18148_c0_g1_i1	0.736135	0.0152035	VDI41807.1 FAS-associated factor 2 [Mytilus galloprovincialis]
TRINITY_DN877_c2_g2_i3	0.735703	0.0152943	VDI34331.1 blast:LINE-1 retrotransposable element ORF2 protein, partial [Mytilus galloprovincialis]
TRINITY_DN14296_c1_g1_i1	0.735671	0.0153012	VDI56933.1 DnaJ homolog subfamily C member 25 [Mytilus galloprovincialis]
TRINITY_DN138678_c0_g1_i1	0.735591	0.0153182	CAG2186148.1 RAC1 [Mytilus edulis]
TRINITY_DN95097_c0_g2_i1	0.735483	0.0153409	CAG2191737.1 K16330 [Mytilus edulis]
TRINITY_DN12524_c0_g1_i2	0.735207	0.0153994	CAG2239091.1 MCEE [Mytilus edulis]
TRINITY_DN16486_c0_g1_i1	0.734859	0.0154733	CAC5393153.1 Down syndrome critical region protein 3,Down syndrome critical region protein 3 homolog [Mytilus coruscus]
TRINITY_DN50694_c0_g1_i8	0.733976	0.0156621	XP_034331492.1 uncharacterized protein LOC117690853 [Crassostrea gigas]
TRINITY_DN272099_c0_g1_i1	0.733921	0.0156739	OPL33029.1 calpain-a-like x1 isoform, partial [Mytilus galloprovincialis]
TRINITY_DN588_c1_g1_i5	0.733312	0.0158053	VDI41620.1 netrin 1 [Mytilus galloprovincialis]
TRINITY_DN151277_c0_g2_i1	0.733065	0.0158586	CAG2189632.1 DCXR [Mytilus edulis]
TRINITY_DN72171_c0_g1_i1	0.7328	0.0159162	ASB29947.1 NADH dehydrogenase subunit 1 [Gigantidas platifrons]
TRINITY_DN206051_c2_g1_i1	0.732758	0.0159252	VDH99785.1 segment polarity protein dishevelled [Mytilus galloprovincialis]
TRINITY_DN41717_c0_g1_i3	0.732632	0.0159527	VDI57333.1 E3 ubiquitin-protein ligase HUWE1 [Mytilus galloprovincialis]
TRINITY_DN1041_c0_g1_i3	0.732613	0.0159567	VDI20527.1 krueppel-like factor 10/11, partial [Mytilus galloprovincialis]
TRINITY_DN27705_c0_g2_i1	0.732265	0.0160325	CAC5366269.1 SETMAR [Mytilus coruscus]
TRINITY_DN243173_c0_g1_i1	0.732251	0.0160356	YP_005089259.1 ND6 gene product [Flustra foliacea]
TRINITY_DN2684_c0_g1_i13	0.732068	0.0160755	CAG2232764.1 ECI2 [Mytilus edulis]
TRINITY_DN87024_c0_g3_i1	0.731945	0.0161025	CAG2232810.1 FASN [Mytilus edulis]
TRINITY_DN9797_c0_g1_i4	0.731918	0.0161084	CAC5387005.1 ANPEP [Mytilus coruscus]
TRINITY_DN120883_c0_g1_i5	0.731683	0.01616	CAG2194023.1 LAT1 [Mytilus edulis]
TRINITY_DN259240_c0_g1_i1	0.731398	0.0162225	VDI45327.1 small nuclear ribonucleoprotein D2 [Mytilus galloprovincialis]
TRINITY_DN82141_c0_g1_i1	0.731388	0.0162246	CAG2235295.1 MSH6 [Mytilus edulis]
TRINITY_DN16087_c0_g1_i1	0.731305	0.0162429	VDI78309.1 mediator of RNA polymerase II transcription subunit 10 [Mytilus galloprovincialis]
TRINITY_DN334983_c0_g1_i1	0.730957	0.0163198	VDI54451.1 hemicentin [Mytilus galloprovincialis]
TRINITY_DN375161_c0_g1_i1	0.730592	0.0164006	ABX44780.1 putative 40S ribosomal protein RPS8 [Flustra foliacea]
TRINITY_DN178213_c0_g1_i1	0.730583	0.0164026	VDI07984.1 small nuclear ribonucleoprotein E [Mytilus galloprovincialis]
TRINITY_DN10739_c0_g1_i8	0.730449	0.0164323	VDH90118.1 mediator of RNA polymerase II transcription subunit 18 [Mytilus galloprovincialis]
TRINITY_DN41654_c0_g1_i1	0.730426	0.0164374	CAG2213761.1 Peptidase M20 domain-containing protein 2 [Mytilus edulis]
TRINITY_DN31927_c1_g1_i2	0.728462	0.0168775	XP_033724833.1 N-alpha-acetyltransferase 38, NatC auxiliary subunit-like [Pecten maximus]
TRINITY_DN16097_c0_g1_i15	0.727695	0.0170516	CAG2188357.1 LIPT1 [Mytilus edulis]
TRINITY_DN363810_c0_g1_i2	0.727635	0.0170652	XP_021347420.1 60S ribosomal protein L34-like [Mizuhopecten yessoensis]
TRINITY_DN20082_c0_g1_i5	0.727575	0.0170789	VDI47013.1 transglutaminase 1 [Mytilus galloprovincialis]
TRINITY_DN9429_c0_g1_i10	0.727386	0.017122	CAG2194074.1 TAF5 [Mytilus edulis]
TRINITY_DN26502_c0_g2_i1	0.727202	0.0171641	CAG2240722.1 HMCN [Mytilus edulis]
TRINITY_DN3689_c0_g1_i16	0.727143	0.0171776	CAG2230202.1 PCYT2 [Mytilus edulis]
TRINITY_DN62619_c0_g2_i1	0.72706	0.0171967	CAG2194169.1 CDKAL1 [Mytilus edulis]
TRINITY_DN107198_c0_g1_i2	0.726899	0.0172337	CAG2198158.1 ADAM10 [Mytilus edulis]
TRINITY_DN13042_c0_g1_i1	0.726683	0.0172832	CAC5356333.1 PTPRT [Mytilus coruscus]
TRINITY_DN268603_c0_g1_i1	0.726605	0.0173011	CAG2221215.1 OPLAH [Mytilus edulis]
TRINITY_DN10846_c0_g1_i14	0.726323	0.017366	VDI76397.1 DNA excision repair protein ERCC-3 [Mytilus galloprovincialis]
TRINITY_DN27887_c0_g1_i1	0.726292	0.0173733	VDI28895.1 HAUS augmin-like complex subunit 7 [Mytilus galloprovincialis]
TRINITY_DN1159_c0_g1_i27	0.725755	0.0174975	CAG2255910.1 NRCAM [Mytilus edulis]
TRINITY_DN25118_c0_g1_i1	0.725529	0.0175499	CAG2245342.1 COXPD7 [Mytilus edulis]
TRINITY_DN7389_c0_g1_i5	0.725129	0.0176431	AJQ21524.1 NOD-like receptor 1 [Mytilus galloprovincialis]
TRINITY_DN104236_c0_g2_i1	0.724819	0.0177155	AAO38780.1 heat shock protein 70 [Azumapecten farreri]
TRINITY_DN4631_c0_g2_i1	0.724717	0.0177394	VDI46972.1 myosin VII, partial [Mytilus galloprovincialis]
TRINITY_DN62498_c0_g1_i3	0.724613	0.0177637	VDI60797.1 latrophilin 3 [Mytilus galloprovincialis]
TRINITY_DN695_c0_g1_i11	0.724195	0.0178619	CAC5396972.1 VPS29 [Mytilus coruscus]
TRINITY_DN7620_c0_g1_i2	0.723797	0.0179557	CAG2208057.1 Protein preli-like,PRELI domain-containing protein 1, mitochondrial [Mytilus edulis]
TRINITY_DN18393_c0_g1_i5	0.723701	0.0179783	CAG2189317.1 B4GALT7 [Mytilus edulis]
TRINITY_DN64791_c0_g2_i1	0.723548	0.0180144	VDI66814.1 isopentenyl-diphosphate Delta-isomerase [Mytilus galloprovincialis]
TRINITY_DN64139_c0_g1_i1	0.723465	0.0180342	CAG2231715.1 PRSS1_2_3 [Mytilus edulis]
TRINITY_DN326525_c0_g1_i1	0.723153	0.0181082	AYK27073.1 thymosin beta 4 [Pinctada fucata]
TRINITY_DN17032_c2_g1_i1	0.722904	0.0181674	XP_010126793.1 PREDICTED: calmodulin, partial [Chlamydotis macqueenii]
TRINITY_DN22443_c0_g1_i1	0.722715	0.0182124	CAC5423953.1 ANKIB1 [Mytilus coruscus]
TRINITY_DN8739_c0_g1_i55	0.722703	0.0182153	VDI45644.1 fructose-2,6-bisphosphatase [Mytilus galloprovincialis]
TRINITY_DN876_c0_g1_i12	0.722521	0.0182586	CAG2191749.1 PDCD6 [Mytilus edulis]
TRINITY_DN111364_c0_g1_i4	0.722346	0.0183006	CAG2189813.1 HGSNAT [Mytilus edulis]
TRINITY_DN14436_c0_g1_i7	0.721919	0.0184028	CAG2226592.1 GBA [Mytilus edulis]
TRINITY_DN66614_c0_g1_i1	0.721846	0.0184204	VDI71294.1 eukaryotic translation initiation factor 2-alpha kinase 4, partial [Mytilus galloprovincialis]
TRINITY_DN79384_c0_g1_i1	0.721655	0.0184664	CAG2238030.1 FURIN [Mytilus edulis]
TRINITY_DN63105_c0_g1_i1	0.72137	0.018535	CAC5381363.1 DPH3 [Mytilus coruscus]
TRINITY_DN27871_c0_g1_i1	0.720963	0.0186335	XP_021362541.1 proteasome assembly chaperone 3-like [Mizuhopecten yessoensis]
TRINITY_DN2097_c1_g1_i3	0.720742	0.018687	CAG2230682.1 PDHA [Mytilus edulis]
TRINITY_DN323461_c0_g1_i1	0.720651	0.0187092	XP_034332933.1 caprin-1 isoform X4 [Crassostrea gigas]
TRINITY_DN6381_c0_g1_i3	0.720636	0.0187128	CAG2213940.1 CAPZB [Mytilus edulis]
TRINITY_DN109177_c3_g1_i1	0.720546	0.0187346	WP_202764496.1 GIY-YIG nuclease family protein, partial [Bathymodiolus brooksi thiotrophic gill symbiont]
TRINITY_DN18263_c0_g2_i1	0.720498	0.0187462	VDH96608.1 general transcription factor 3C polypeptide 6 [Mytilus galloprovincialis]
TRINITY_DN32537_c0_g2_i1	0.720328	0.0187878	VDI13507.1 obscurin-RhoGEF [Mytilus galloprovincialis]
TRINITY_DN32330_c0_g1_i4	0.719922	0.0188868	VDI26772.1 trafficking kinesin-binding protein 1 [Mytilus galloprovincialis]
TRINITY_DN277772_c0_g1_i1	0.719768	0.0189244	VDI78529.1 MFS transporter, OCT family, solute carrier family 22 (organic cation transporter), member 4/5 [Mytilus galloprovincialis]
TRINITY_DN129534_c0_g1_i1	0.719709	0.0189389	CAG2231340.1 BIRC2_3 [Mytilus edulis]
TRINITY_DN74056_c0_g1_i3	0.719063	0.0190976	XP_044169929.1 uncharacterized protein LOC122953994 [Acropora millepora]
TRINITY_DN110880_c0_g2_i5	0.71893	0.0191304	CAG2185275.1 Serine/arginine-rich splicing factor 3,RNA-binding protein 1 [Mytilus edulis]
TRINITY_DN23986_c0_g1_i4	0.718509	0.0192346	CAG2187111.1 ALOX5 [Mytilus edulis]
TRINITY_DN21594_c0_g1_i20	0.718366	0.0192699	CAG2220949.1 FBXW7 [Mytilus edulis]
TRINITY_DN7593_c0_g1_i10	0.718272	0.0192932	VDI55623.1 molecular chaperone DnaK [Mytilus galloprovincialis]
TRINITY_DN11699_c0_g2_i3	0.718201	0.0193109	VDI71410.1 phosphomevalonate kinase [Mytilus galloprovincialis]
TRINITY_DN133894_c0_g1_i2	0.718084	0.01934	VDI77753.1 sulfinoalanine decarboxylase [Mytilus galloprovincialis]
TRINITY_DN91592_c0_g1_i2	0.717938	0.0193762	CAC5363998.1 selB [Mytilus coruscus]
TRINITY_DN36253_c0_g1_i1	0.717656	0.0194466	CAG2191863.1 POLD2 [Mytilus edulis]
TRINITY_DN142896_c0_g1_i1	0.717322	0.0195301	CAC5360914.1 LKR [Mytilus coruscus]
TRINITY_DN267244_c0_g1_i1	0.717252	0.0195476	XP_046375464.1 cytochrome c oxidase subunit 4 isoform 1, mitochondrial-like isoform X2 [Haliotis rufescens]
TRINITY_DN104444_c0_g1_i1	0.717233	0.0195523	CAG2206925.1 CCKBR [Mytilus edulis]
TRINITY_DN2351_c1_g1_i12	0.716921	0.0196305	XP_041364294.1 uncharacterized protein LOC121379709 [Gigantopelta aegis]
TRINITY_DN3644_c0_g1_i15	0.715654	0.0199506	ADY38576.1 selenium-dependent glutathione peroxidase [Mytilus galloprovincialis]
TRINITY_DN242058_c0_g1_i1	0.715494	0.0199911	CAG2231809.1 TRIM56 [Mytilus edulis]
TRINITY_DN395380_c0_g1_i1	0.714914	0.020139	CAG2190693.1 STRA6 [Mytilus edulis]
TRINITY_DN19650_c0_g1_i13	0.714869	0.0201504	CAG2217705.1 NPTN [Mytilus edulis]
TRINITY_DN1488_c0_g1_i5	0.714306	0.0202949	XP_033745472.1 uncharacterized protein LOC117330985 [Pecten maximus]
TRINITY_DN55406_c0_g1_i10	0.714211	0.0203194	VDI32508.1 aprataxin [Mytilus galloprovincialis]
TRINITY_DN1146_c1_g1_i16	0.7142	0.0203221	XP_022289764.1 transmembrane protein 230-like [Crassostrea virginica]
TRINITY_DN30037_c0_g2_i1	0.71388	0.0204045	CAG2216420.1 METTL4 [Mytilus edulis]
TRINITY_DN28527_c0_g1_i10	0.713876	0.0204055	CAG2241924.1 SLC39A13 [Mytilus edulis]
TRINITY_DN193088_c2_g1_i1	0.713814	0.0204215	VDI13692.1 molecular chaperone HtpG [Mytilus galloprovincialis]
TRINITY_DN5863_c0_g1_i7	0.713767	0.0204337	VDI51930.1 DnaJ homolog subfamily C member 11 [Mytilus galloprovincialis]
TRINITY_DN149660_c0_g1_i1	0.713599	0.0204772	CAC5362276.1 HSP90A [Mytilus coruscus]
TRINITY_DN4693_c0_g1_i2	0.713165	0.0205895	CAG2215435.1 BRN [Mytilus edulis]
TRINITY_DN131954_c0_g1_i4	0.712957	0.0206435	CAC5388565.1 Monocarboxylate transporter 14 [Mytilus coruscus]
TRINITY_DN2891_c5_g1_i10	0.712843	0.0206732	CAG2201953.1 LIPA [Mytilus edulis]
TRINITY_DN4147_c1_g2_i4	0.712794	0.0206861	CAG2245371.1 PIR [Mytilus edulis]
TRINITY_DN56811_c0_g1_i3	0.712792	0.0206865	QDH76497.1 toll-like receptor 3 [Mytilus coruscus]
TRINITY_DN18317_c0_g1_i12	0.712729	0.0207028	CAC5420200.1 NPC1 [Mytilus coruscus]
TRINITY_DN4896_c1_g1_i14	0.712217	0.0208366	CAC5398734.1 EMC8_9 [Mytilus coruscus]
TRINITY_DN227_c1_g1_i13	0.712176	0.0208474	CAG2202687.1 NEK1_4_5 [Mytilus edulis]
TRINITY_DN5622_c0_g1_i10	0.711923	0.0209138	CAC5381543.1 CDH1 [Mytilus coruscus]
TRINITY_DN67798_c1_g1_i3	0.71182	0.0209407	CAG2217411.1 SLCO4A [Mytilus edulis]
TRINITY_DN11597_c0_g2_i3	0.711809	0.0209438	VDI00840.1 sequestosome 1 [Mytilus galloprovincialis]
TRINITY_DN17050_c0_g1_i10	0.711609	0.0209961	VDI69883.1 beta-glucuronidase [Mytilus galloprovincialis]
TRINITY_DN12668_c0_g1_i1	0.711468	0.0210334	CAG2214192.1 SNRNP25 [Mytilus edulis]
TRINITY_DN20359_c0_g1_i12	0.711421	0.0210457	CAG2252312.1 TTN [Mytilus edulis]
TRINITY_DN85875_c0_g1_i4	0.711345	0.0210657	CAG2247407.1 Glutathione S-transferase LANCL1,LanC-like protein 2 [Mytilus edulis]
TRINITY_DN22099_c0_g1_i10	0.711104	0.0211293	VDI68594.1 biotin--protein ligase [Mytilus galloprovincialis]
TRINITY_DN154537_c0_g1_i1	0.711093	0.0211323	CAG2200598.1 SIR2L5 [Mytilus edulis]
TRINITY_DN82205_c0_g1_i11	0.711	0.0211569	CAC5371656.1 TROVE2 [Mytilus coruscus]
TRINITY_DN4143_c0_g1_i4	0.710979	0.0211624	CAG2229804.1 AGA [Mytilus edulis]
TRINITY_DN41839_c0_g1_i1	0.710967	0.0211657	CAG2206121.1 Low-density lipoprotein receptor-related protein 4,Prolow-density lipoprotein receptor-related protein 1,Low-density lipoprotein receptor-related protein 2,Very low-density lipoprotein receptor [Mytilus edulis]
TRINITY_DN13548_c0_g1_i6	0.710489	0.0212922	VDI58278.1 solute carrier family 39 (zinc transporter), member 1/2/3 [Mytilus galloprovincialis]
TRINITY_DN325027_c0_g1_i1	0.710407	0.021314	CAC5409201.1 VDAC2 [Mytilus coruscus]
TRINITY_DN146901_c0_g1_i2	0.710223	0.021363	AFP57558.1 heat shock cognate protein 70, partial [Latrodectus hesperus]
TRINITY_DN160050_c0_g3_i2	0.710183	0.0213737	CAG2240652.1 AMT [Mytilus edulis]
TRINITY_DN234692_c0_g1_i2	0.710119	0.0213907	VDI10192.1 ankyrin repeat-rich membrane spanning protein [Mytilus galloprovincialis]
TRINITY_DN79477_c2_g1_i1	0.709638	0.0215193	CAC5406559.1 RP-L17e [Mytilus coruscus]
TRINITY_DN254_c0_g1_i7	0.709408	0.0215807	CAG2222502.1 LAMAN [Mytilus edulis]
TRINITY_DN63650_c0_g1_i1	0.70932	0.0216043	VDI69329.1 mitochondrial cardiolipin hydrolase [Mytilus galloprovincialis]
TRINITY_DN1700_c1_g1_i10	0.709063	0.0216735	VDI48570.1 transglutaminase 1 [Mytilus galloprovincialis]
TRINITY_DN14284_c0_g1_i2	0.708751	0.0217574	CAG2207831.1 PPP2R4 [Mytilus edulis]
TRINITY_DN9621_c0_g1_i17	0.708734	0.0217621	CAC5378470.1 NAA30 [Mytilus coruscus]
TRINITY_DN71828_c0_g1_i1	0.708526	0.0218183	CAC5423507.1 HNRNPABD [Mytilus coruscus]
TRINITY_DN4331_c0_g1_i3	0.708426	0.0218452	CAG2227131.1 PPP1R3 [Mytilus edulis]
TRINITY_DN267989_c0_g1_i1	0.708224	0.0218997	VDI31489.1 plastin-1 [Mytilus galloprovincialis]
TRINITY_DN28221_c0_g1_i3	0.708029	0.0219528	CAG2240853.1 NME [Mytilus edulis]
TRINITY_DN39827_c0_g1_i1	0.70798	0.021966	AHF20923.1 CRP-I 3 [Mytilus galloprovincialis]
TRINITY_DN86851_c0_g1_i1	0.707914	0.0219839	CAG2225187.1 Acetylcholinesterase [Mytilus edulis]
TRINITY_DN737_c0_g1_i12	0.707836	0.0220052	CAG2194201.1 Transmembrane protein 120B,Transmembrane protein 120 homolog,Transmembrane protein 120B-B,Transmembrane protein 120A,Transmembrane protein 120B-A [Mytilus edulis]
TRINITY_DN6785_c2_g1_i1	0.707824	0.0220083	VDI69022.1 mediator of RNA polymerase II transcription subunit 7 [Mytilus galloprovincialis]
TRINITY_DN135195_c0_g1_i1	0.707661	0.0220527	CAC5378346.1 uidA [Mytilus coruscus]
TRINITY_DN11018_c0_g1_i3	0.707564	0.022079	CAG2245119.1 CES2 [Mytilus edulis]
TRINITY_DN6531_c0_g1_i2	0.707172	0.0221862	CAC5401931.1 SLC28A [Mytilus coruscus]
TRINITY_DN25280_c0_g1_i12	0.70713	0.0221975	VDI08779.1 acetyl-CoA synthetase [Mytilus galloprovincialis]
TRINITY_DN35263_c0_g1_i1	0.706895	0.022262	VDI37378.1 mannosyl-glycoprotein endo-beta-N-acetylglucosaminidase [Mytilus galloprovincialis]
TRINITY_DN46390_c0_g1_i1	0.706727	0.022308	CAG2201565.1 STRA6 [Mytilus edulis]
TRINITY_DN144054_c0_g1_i1	0.706623	0.0223365	CAG2221918.1 Fibrinogen gamma chain,Ryncolin-4,Fibrinogen-like protein A,Ficolin-1-A [Mytilus edulis]
TRINITY_DN373368_c0_g1_i1	0.70645	0.022384	XP_046564222.1 60S ribosomal protein L11 [Haliotis rubra]
TRINITY_DN66142_c0_g1_i1	0.706401	0.0223975	CAG2245721.1 TRIM2_3 [Mytilus edulis]
TRINITY_DN187759_c0_g1_i1	0.70636	0.0224088	VDI15370.1 caprin-1 [Mytilus galloprovincialis]
TRINITY_DN4778_c0_g1_i29	0.706232	0.022444	VDI63700.1 isocitrate dehydrogenase (NAD+) [Mytilus galloprovincialis]
TRINITY_DN71290_c0_g1_i1	0.705716	0.0225864	VDI45438.1 choline dehydrogenase [Mytilus galloprovincialis]
TRINITY_DN19088_c0_g1_i3	0.705648	0.0226053	CAC5392005.1 MRPL39 [Mytilus coruscus]
TRINITY_DN358518_c0_g1_i1	0.705283	0.0227064	CAG2218792.1 Tyrosine-protein phosphatase 1,Tyrosine-protein phosphatase non-receptor type 13,Tyrosine-protein phosphatase non-receptor type 7 [Mytilus edulis]
TRINITY_DN19608_c0_g1_i3	0.704998	0.0227856	CAC5393218.1 ZDHHC9_14_18 [Mytilus coruscus]
TRINITY_DN48574_c0_g1_i2	0.704993	0.022787	VDI05637.1 titin [Mytilus galloprovincialis]
TRINITY_DN231690_c0_g1_i1	0.704355	0.0229652	VDH91396.1 prohibitin 2 [Mytilus galloprovincialis]
TRINITY_DN200738_c0_g1_i1	0.704301	0.0229803	CAG2227983.1 NSMF [Mytilus edulis]
TRINITY_DN50370_c0_g1_i1	0.704297	0.0229813	VDI29045.1 ATP-binding cassette, subfamily G (WHITE), member 8 (sterolin 2) [Mytilus galloprovincialis]
TRINITY_DN43157_c0_g1_i21	0.70391	0.0230899	VDI24468.1 choline dehydrogenase [Mytilus galloprovincialis]
TRINITY_DN107871_c0_g1_i1	0.703805	0.0231195	CAG2249829.1 INTS1 [Mytilus edulis]
TRINITY_DN83044_c0_g1_i6	0.703613	0.0231734	VDI60797.1 latrophilin 3 [Mytilus galloprovincialis]
TRINITY_DN49343_c0_g1_i2	0.703441	0.0232219	XP_045202242.1 uncharacterized protein LOC123555715 [Mercenaria mercenaria]
TRINITY_DN9876_c0_g1_i8	0.703389	0.0232367	VDI41821.1 limbic system-associated membrane protein [Mytilus galloprovincialis]
TRINITY_DN32686_c0_g2_i1	0.703201	0.0232896	CAG2189260.1 CASP8 [Mytilus edulis]
TRINITY_DN108564_c0_g1_i1	0.702819	0.0233979	VDI79072.1 tRNA-dihydrouridine synthase 2 [Mytilus galloprovincialis]
TRINITY_DN12315_c1_g1_i1	0.702762	0.0234139	CAC5402591.1 Fibrinogen-like protein A,Ryncolin-4,Ficolin-3,Ficolin-1-B,Techylectin-5A,Ficolin-2,Ryncolin-1,Tenascin-R,Ficolin-1,Tenascin-X,Tenascin-N,Ryncolin-3,Fibrinogen C domain-containing protein 1,Ryncolin-2,Techylectin-5B,Angiopoietin-2,Angiopoietin-related protein 2,Microfibril-associated glycoprotein 4,Ficolin-1-A,Tenascin,Fibrinogen C domain-containing protein 1-B [Mytilus coruscus]
TRINITY_DN79_c0_g1_i3	0.70262	0.0234544	VDI05750.1 D-amino-acid oxidase [Mytilus galloprovincialis]
TRINITY_DN564_c0_g1_i1	0.702382	0.023522	CAG2225462.1 TAGLN [Mytilus edulis]
TRINITY_DN151471_c0_g1_i1	0.702016	0.0236263	VDI78700.1 protein transport protein DSL1/ZW10 [Mytilus galloprovincialis]
TRINITY_DN89222_c0_g2_i5	0.701939	0.0236483	WP_202764496.1 GIY-YIG nuclease family protein, partial [Bathymodiolus brooksi thiotrophic gill symbiont]
TRINITY_DN17652_c0_g1_i10	0.701791	0.0236905	VDI37522.1 ectonucleotide pyrophosphatase/phosphodiesterase family member 5 [Mytilus galloprovincialis]
TRINITY_DN41998_c0_g1_i2	0.701549	0.0237598	CAG2200598.1 SIR2L5 [Mytilus edulis]
TRINITY_DN107243_c0_g1_i1	0.701406	0.0238007	XP_035751568.1 tubulin alpha chain, partial [Egretta garzetta]
TRINITY_DN49618_c0_g1_i3	0.701279	0.0238373	XP_034325510.1 uncharacterized protein LOC105345727 [Crassostrea gigas]
TRINITY_DN14774_c0_g1_i4	0.701215	0.0238554	CAG2231910.1 ACADL [Mytilus edulis]
TRINITY_DN8351_c1_g4_i1	0.700276	0.0241264	VDI20100.1 dynein assembly factor 2, axonemal, partial [Mytilus galloprovincialis]
TRINITY_DN88314_c0_g1_i1	0.700234	0.0241386	VDI08272.1 mTERF domain-containing protein, mitochondrial [Mytilus galloprovincialis]
TRINITY_DN18803_c1_g1_i27	0.700168	0.0241576	VDI30624.1 tetraspanin-18 [Mytilus galloprovincialis]
TRINITY_DN12184_c0_g1_i8	0.700111	0.0241742	VDI35624.1 splicing factor 1 [Mytilus galloprovincialis]
TRINITY_DN110970_c0_g1_i1	0.700003	0.0242054	CAG2223624.1 Tyrosine-protein phosphatase 1,Receptor-type tyrosine-protein phosphatase F,Receptor-type tyrosine-protein phosphatase eta,Tyrosine-protein phosphatase non-receptor type 13,Tyrosine-protein phosphatase non-receptor type 11,Tyrosine-protein phosphatase 10D,Tyrosine-protein phosphatase corkscrew,Receptor-type tyrosine-protein phosphatase H [Mytilus edulis]
TRINITY_DN3439_c0_g1_i20	0.699873	0.0242432	CAG2192892.1 TRPL translocation defect protein 14 [Mytilus edulis]
TRINITY_DN223592_c0_g1_i1	0.699226	0.0244315	CAG2187997.1 TDRD9 [Mytilus edulis]
TRINITY_DN6876_c1_g2_i1	0.698789	0.0245596	VDI16988.1 AP-5 complex subunit beta-1 [Mytilus galloprovincialis]
TRINITY_DN189459_c0_g1_i1	0.698673	0.0245934	CAG2207780.1 DCXR [Mytilus edulis]
TRINITY_DN2747_c0_g1_i1	0.698496	0.0246455	CAC5375740.1 Fibrinogen-like protein A,Ryncolin-4,Angiopoietin-related protein 7,Angiopoietin-related protein 1,Ficolin-1-B,Techylectin-5A,Ficolin-2,Fibrinogen-like protein 1-like protein,Ryncolin-1,Tenascin-R,Fibrinogen-like protein 1,Angiopoietin-1,Tenascin-X,Fibrinogen C domain-containing protein 1-A,Tenascin-N,Ryncolin-3,Tenascin,Fibroleukin,Fibrinogen C domain-containing protein 1,Fibrinogen…
TRINITY_DN16274_c0_g1_i1	0.698125	0.0247547	CAC5384540.1 ALG8 [Mytilus coruscus]
TRINITY_DN160050_c0_g4_i1	0.697716	0.0248755	CAG2240652.1 AMT [Mytilus edulis]
TRINITY_DN20482_c1_g5_i1	0.697674	0.0248878	OPL33122.1 insulin receptor-like, partial [Mytilus galloprovincialis]
TRINITY_DN1458_c0_g1_i31	0.697527	0.0249313	CAC5372117.1 ATP1B [Mytilus coruscus]
TRINITY_DN347193_c0_g1_i1	0.697374	0.0249765	CAC5423811.1 NASP [Mytilus coruscus]
TRINITY_DN29421_c0_g1_i1	0.69736	0.0249808	YP_009407582.1 cytochrome oxidase subunit 1 [Gigantidas platifrons]
TRINITY_DN221867_c0_g1_i1	0.697112	0.0250542	WP_012202308.1 MULTISPECIES: CsbD family protein [Delftia]
TRINITY_DN26705_c0_g1_i6	0.697052	0.0250721	CAG2222398.1 PIP5K [Mytilus edulis]
TRINITY_DN138500_c0_g1_i1	0.696947	0.0251033	KAF6021489.1 CTSF [Bugula neritina]
TRINITY_DN9805_c1_g2_i2	0.696133	0.0253463	CAC5411622.1 FCN [Mytilus coruscus]
TRINITY_DN75942_c1_g1_i1	0.69605	0.0253714	VDI28038.1 RNA-binding protein Musashi [Mytilus galloprovincialis]
TRINITY_DN91696_c0_g1_i3	0.69603	0.0253773	CAG2227013.1 ZDHHC [Mytilus edulis]
TRINITY_DN78633_c0_g1_i1	0.695955	0.0253997	CAG2214594.1 PIK3CA_B_D [Mytilus edulis]
TRINITY_DN8015_c0_g1_i3	0.695895	0.0254176	VDI22303.1 type 2A phosphatase activator TIP41 [Mytilus galloprovincialis]
TRINITY_DN349612_c0_g1_i1	0.695837	0.0254351	CAG2253147.1 Putative inactive carboxylesterase 4 [Mytilus edulis]
TRINITY_DN17613_c0_g1_i12	0.695804	0.0254452	VDI40738.1 thrombospondin 2/3/4/5 [Mytilus galloprovincialis]
TRINITY_DN15591_c0_g1_i3	0.695751	0.0254609	VDI08242.1 triose/dihydroxyacetone kinase / FAD-AMP lyase (cyclizing) [Mytilus galloprovincialis]
TRINITY_DN233234_c0_g1_i1	0.69567	0.0254853	ABX44777.1 putative 40S ribosomal protein RPS5 [Flustra foliacea]
TRINITY_DN50281_c0_g1_i2	0.695596	0.0255075	VDI01232.1 nucleosome-remodeling factor subunit BPTF, partial [Mytilus galloprovincialis]
TRINITY_DN6980_c0_g1_i2	0.695558	0.0255189	CAG2214294.1 TMC [Mytilus edulis]
TRINITY_DN130_c1_g1_i1	0.695318	0.0255913	XP_041353554.1 calmodulin-A-like [Gigantopelta aegis]
TRINITY_DN4147_c1_g1_i1	0.6952	0.0256269	CAG2245371.1 PIR [Mytilus edulis]
TRINITY_DN26288_c6_g1_i1	0.695171	0.0256355	CAC5407290.1 TN [Mytilus coruscus]
TRINITY_DN370610_c0_g1_i1	0.695038	0.0256757	CAG2240048.1 ELOVL4 [Mytilus edulis]
TRINITY_DN24516_c2_g1_i2	0.694823	0.0257409	CAC5362618.1 HARBI1 [Mytilus coruscus]
TRINITY_DN281885_c0_g1_i1	0.694657	0.025791	CAC5358946.1 TRIM56 [Mytilus coruscus]
TRINITY_DN39289_c0_g1_i11	0.69445	0.025854	VDH99898.1 O-phospho-L-seryl-tRNASec:L-selenocysteinyl-tRNA synthase [Mytilus galloprovincialis]
TRINITY_DN112390_c0_g1_i1	0.694385	0.0258735	CAC5418426.1 HARBI1 [Mytilus coruscus]
TRINITY_DN51530_c0_g1_i1	0.694064	0.0259713	CAC5388097.1 ABCB10 [Mytilus coruscus]
TRINITY_DN3086_c0_g1_i4	0.694052	0.0259748	VDI77590.1 arylsulfatase B, partial [Mytilus galloprovincialis]
TRINITY_DN151140_c0_g1_i1	0.693977	0.0259979	VDI19823.1 metabotropic X receptor [Mytilus galloprovincialis]
TRINITY_DN4088_c0_g1_i4	0.693605	0.0261112	VDI03468.1 ovo [Mytilus galloprovincialis]
TRINITY_DN41317_c0_g1_i5	0.693478	0.0261503	CAG2209857.1 RDH12 [Mytilus edulis]
TRINITY_DN2_c3_g4_i1	0.693326	0.0261966	VDH99768.1 centromere protein L [Mytilus galloprovincialis]
TRINITY_DN65057_c0_g1_i1	0.693209	0.0262326	VDI31112.1 selenoprotein N [Mytilus galloprovincialis]
TRINITY_DN50168_c0_g2_i5	0.692828	0.0263494	CAC5401754.1 HSD11B1 [Mytilus coruscus]
TRINITY_DN26506_c0_g1_i12	0.692768	0.026368	VDH90571.1 N-acetylglucosaminylphosphatidylinositol deacetylase [Mytilus galloprovincialis]
TRINITY_DN53622_c0_g1_i1	0.692733	0.0263787	VDI30467.1 neuropeptide Y receptor, invertebrate [Mytilus galloprovincialis]
TRINITY_DN9851_c0_g1_i11	0.692654	0.0264032	CAG2234329.1 GCP5 [Mytilus edulis]
TRINITY_DN335787_c0_g1_i1	0.692366	0.026492	CAC5372814.1 FUBP [Mytilus coruscus]
TRINITY_DN163133_c2_g1_i1	0.69235	0.0264969	CAC5403099.1 TRIM56 [Mytilus coruscus]
TRINITY_DN80679_c0_g1_i7	0.692284	0.0265173	XP_021366307.1 U6 snRNA-associated Sm-like protein LSm5 [Mizuhopecten yessoensis]
TRINITY_DN109565_c0_g1_i1	0.692183	0.0265483	CAC5396990.1 argH [Mytilus coruscus]
TRINITY_DN68143_c0_g2_i1	0.692169	0.0265527	CAC5381977.1 ANK [Mytilus coruscus]
TRINITY_DN78616_c0_g2_i2	0.692088	0.0265777	VDI26804.1 Rab5 GDP/GTP exchange factor, partial [Mytilus galloprovincialis]
TRINITY_DN109899_c0_g1_i1	0.692001	0.0266046	VDI35402.1 glycerophosphodiester phosphodiesterase [Mytilus galloprovincialis]
TRINITY_DN157844_c0_g1_i1	0.691441	0.0267784	CAG2237407.1 ACOX1 [Mytilus edulis]
TRINITY_DN25779_c0_g1_i1	0.691432	0.0267814	VDI39702.1 ATP-binding cassette, subfamily A (ABC1), member 1 [Mytilus galloprovincialis]
TRINITY_DN14147_c0_g1_i8	0.691425	0.0267836	CAG2188253.1 RAB39B [Mytilus edulis]
TRINITY_DN86500_c0_g1_i1	0.691335	0.0268116	CAC5380997.1 SAM50 [Mytilus coruscus]
TRINITY_DN285137_c0_g1_i1	0.691176	0.0268609	XP_014681346.1 PREDICTED: 60S ribosomal protein L35 [Priapulus caudatus]
TRINITY_DN4561_c0_g1_i2	0.690343	0.0271214	CAG2234559.1 RBM22 [Mytilus edulis]
TRINITY_DN141336_c0_g1_i1	0.690329	0.0271259	XP_015776635.1 PREDICTED: uncharacterized protein LOC107354668 [Acropora digitifera]
TRINITY_DN20402_c0_g1_i2	0.690116	0.0271928	ACA23131.1 cytochrome c, partial [Mytilus edulis]
TRINITY_DN207608_c0_g2_i1	0.689855	0.0272748	CAG2185883.1 TNKS [Mytilus edulis]
TRINITY_DN161734_c0_g1_i1	0.689356	0.0274323	ABY60966.1 lysosomal beta-glucuronidase, partial [Mytilus galloprovincialis]
TRINITY_DN561_c0_g1_i2	0.68912	0.0275069	CAG2251978.1 PTGES3 [Mytilus edulis]
TRINITY_DN120776_c0_g1_i1	0.688963	0.0275566	CAG2208739.1 GATAD1 [Mytilus edulis]
TRINITY_DN12598_c0_g2_i2	0.688962	0.027557	VDH91326.1 sorting nexin-7/30 [Mytilus galloprovincialis]
TRINITY_DN14740_c0_g1_i10	0.688797	0.0276093	CAG2194151.1 POLR2E [Mytilus edulis]
TRINITY_DN4880_c0_g1_i1	0.688708	0.0276377	CAG2244302.1 ELP5 [Mytilus edulis]
TRINITY_DN53567_c0_g1_i2	0.688585	0.0276769	CAG2200598.1 SIR2L5 [Mytilus edulis]
TRINITY_DN13644_c0_g1_i2	0.688189	0.0278029	CAC5408814.1 TM2 domain-containing protein 3,TM2 domain-containing protein C41D11.9,TM2 domain-containing protein almondex [Mytilus coruscus]
TRINITY_DN803_c0_g2_i38	0.688054	0.0278459	CAG2245866.1 CHK [Mytilus edulis]
TRINITY_DN212817_c0_g1_i1	0.687982	0.0278691	VDH99785.1 segment polarity protein dishevelled [Mytilus galloprovincialis]
TRINITY_DN59466_c0_g1_i2	0.687682	0.0279649	VDI14049.1 ATP-dependent DNA helicase RecQ [Mytilus galloprovincialis]
TRINITY_DN300_c0_g2_i1	0.687375	0.0280636	CAC5392974.1 PLXND [Mytilus coruscus]
TRINITY_DN46525_c0_g1_i10	0.68727	0.0280973	VDI21304.1 crossover junction endonuclease MUS81 [Mytilus galloprovincialis]
TRINITY_DN64719_c0_g1_i1	0.687238	0.0281074	CAC5398762.1 VPS4 [Mytilus coruscus]
TRINITY_DN64943_c0_g1_i3	0.687153	0.0281349	VDI23635.1 hexokinase [Mytilus galloprovincialis]
TRINITY_DN21546_c0_g1_i2	0.686951	0.0282	VDI38159.1 maltase-glucoamylase [Mytilus galloprovincialis]
TRINITY_DN3641_c0_g1_i1	0.68662	0.0283065	OPL33222.1 stomatin-like 2-like protein, partial [Mytilus galloprovincialis]
TRINITY_DN262411_c0_g1_i3	0.686619	0.0283068	VDI56353.1 blast:Zinc finger protein 836 [Mytilus galloprovincialis]
TRINITY_DN3443_c7_g1_i1	0.686586	0.0283175	CAG2192839.1 Solute carrier family 5 member 4,Sodium/nucleoside cotransporter,Sodium/myo-inositol cotransporter,Sodium/glucose cotransporter 5,Solute carrier family 5 member 4A,Sodium/glucose cotransporter 4,Sodium/glucose cotransporter 2,Sodium/glucose cotransporter 1,Sodium/myo-inositol cotransporter 2 [Mytilus edulis]
TRINITY_DN16215_c1_g1_i17	0.686468	0.0283559	CAC5400281.1 RANBP2 [Mytilus coruscus]
TRINITY_DN68837_c0_g1_i2	0.686458	0.028359	CAG2237830.1 ARHGEF30 [Mytilus edulis]
TRINITY_DN13228_c0_g2_i3	0.68624	0.0284296	CAG2203918.1 BAG1 [Mytilus edulis]
TRINITY_DN1347_c2_g1_i14	0.685939	0.0285271	CAC5426327.1 MYOF [Mytilus coruscus]
TRINITY_DN10980_c0_g1_i8	0.685897	0.0285409	CAG2206445.1 DERA [Mytilus edulis]
TRINITY_DN1716_c1_g1_i1	0.685578	0.0286445	VDI63324.1 peptidyl-prolyl cis-trans isomerase NIMA-interacting 4 [Mytilus galloprovincialis]
TRINITY_DN60876_c0_g2_i4	0.685243	0.0287538	CAG2203691.1 TTLL9 [Mytilus edulis]
TRINITY_DN44184_c0_g1_i2	0.68519	0.0287712	CAC5374714.1 ZBTB17 [Mytilus coruscus]
TRINITY_DN248726_c0_g1_i1	0.685147	0.0287851	CAG2257375.1 Receptor-type guanylate cyclase gcy-9,Receptor-type guanylate cyclase gcy-7,Receptor-type guanylate cyclase gcy-22,Receptor-type guanylate cyclase gcy-11,Guanylyl cyclase GC-E,Receptor-type guanylate cyclase gcy-17,Retinal guanylyl cyclase 1,Receptor-type guanylate cyclase gcy-12,Receptor-type guanylate cyclase daf-11,Guanylate cyclase 2G,Olfactory guanylyl cyclase GC-D,Receptor-type…
TRINITY_DN10385_c0_g1_i7	0.685134	0.0287895	CAC5396273.1 COMMD7 [Mytilus coruscus]
TRINITY_DN97225_c0_g1_i1	0.685091	0.0288034	VDI75014.1 DNA repair and recombination protein RAD54B [Mytilus galloprovincialis]
TRINITY_DN107560_c0_g1_i5	0.684657	0.0289455	CAG2195765.1 High mobility group protein DSP1,High mobility group protein 1 homolog,High mobility group protein B1,High mobility group protein B2 [Mytilus edulis]
TRINITY_DN268076_c0_g1_i1	0.684522	0.0289898	XP_033724904.1 LOW QUALITY PROTEIN: ornithine decarboxylase antizyme 1-like [Pecten maximus]
TRINITY_DN102999_c0_g1_i1	0.684476	0.0290048	VDI08327.1 mannose receptor, C type [Mytilus galloprovincialis]
TRINITY_DN6667_c0_g1_i1	0.684456	0.0290115	VDI66883.1 hormonally upregulated Neu-associated kinase [Mytilus galloprovincialis]
TRINITY_DN96056_c1_g1_i1	0.68437	0.0290398	VDI21592.1 sacsin, partial [Mytilus galloprovincialis]
TRINITY_DN115492_c0_g1_i1	0.684204	0.0290943	CAG2247062.1 ERBB4 [Mytilus edulis]
TRINITY_DN1538_c0_g1_i8	0.684099	0.029129	CAG2214419.1 TARDBP [Mytilus edulis]
TRINITY_DN4298_c0_g1_i26	0.684085	0.0291337	VDI37905.1 ubiquitin-conjugating enzyme E2 D [Mytilus galloprovincialis]
TRINITY_DN30763_c0_g2_i1	0.683567	0.0293046	CAC5376074.1 pdxK [Mytilus coruscus]
TRINITY_DN61624_c0_g1_i2	0.683139	0.0294464	CAG2226259.1 DZIP1 [Mytilus edulis]
TRINITY_DN4699_c0_g1_i3	0.682913	0.0295214	WP_202786956.1 reverse transcriptase domain-containing protein [Bathymodiolus brooksi thiotrophic gill symbiont]
TRINITY_DN2930_c1_g1_i11	0.682762	0.0295717	CAC5396658.1 SEH1 [Mytilus coruscus]
TRINITY_DN25896_c0_g1_i13	0.682508	0.0296561	VDH97352.1 regulator of G-protein signalling 3 [Mytilus galloprovincialis]
TRINITY_DN304893_c0_g1_i1	0.68242	0.0296855	CAG2258049.1 SULT1 [Mytilus edulis]
TRINITY_DN33373_c0_g1_i3	0.682176	0.0297672	VDI37767.1 solute carrier family 10 (sodium/bile acid cotransporter), member 7 [Mytilus galloprovincialis]
TRINITY_DN90867_c0_g1_i2	0.682072	0.0298018	CAC5388347.1 THBS2S [Mytilus coruscus]
TRINITY_DN3067_c0_g3_i2	0.68196	0.0298394	OPL33660.1 optic atrophy3 protein, partial [Mytilus galloprovincialis]
TRINITY_DN77172_c0_g1_i1	0.681917	0.0298538	VDI64060.1 mediator of RNA polymerase II transcription subunit 28 [Mytilus galloprovincialis]
TRINITY_DN368504_c0_g1_i1	0.68185	0.0298761	ABX44835.1 putative 60S ribosomal protein RPL32 [Flustra foliacea]
TRINITY_DN10771_c0_g1_i14	0.681814	0.0298883	CAC5400554.1 GPAT1_2 [Mytilus coruscus]
TRINITY_DN334453_c0_g1_i1	0.681692	0.0299293	XP_013064518.1 PREDICTED: 40S ribosomal protein S2 [Biomphalaria glabrata]
TRINITY_DN283840_c0_g1_i1	0.681561	0.0299732	XP_045463412.1 60S ribosomal protein L3-like [Harmonia axyridis]
TRINITY_DN9415_c3_g1_i13	0.681552	0.0299761	OPL33367.1 receptor-type t tyrosine-protein phosphatase, partial [Mytilus galloprovincialis]
TRINITY_DN39725_c0_g2_i1	0.681241	0.0300807	KAF6020815.1 eef2 [Bugula neritina]
TRINITY_DN169193_c0_g1_i1	0.680937	0.0301831	CAG2256230.1 Lysoplasmalogenase-like protein TMEM86A [Mytilus edulis]
TRINITY_DN13860_c0_g1_i12	0.680539	0.0303177	CAG2218340.1 Tctex1 domain-containing protein 4 [Mytilus edulis]
TRINITY_DN356454_c0_g1_i1	0.68043	0.0303547	CAG2248524.1 PXDN [Mytilus edulis]
TRINITY_DN34116_c0_g1_i1	0.680403	0.0303637	XP_033760202.1 tyrosine-protein kinase SRK2-like isoform X3 [Pecten maximus]
TRINITY_DN20539_c0_g1_i10	0.679998	0.0305013	CAG2202460.1 ALKBH7 [Mytilus edulis]
TRINITY_DN48137_c0_g1_i1	0.679936	0.0305223	CAG2258150.1 TRAPPC11 [Mytilus edulis]
TRINITY_DN32682_c0_g2_i2	0.679892	0.0305372	VDH98166.1 toll-like receptor 13 [Mytilus galloprovincialis]
TRINITY_DN927_c0_g1_i7	0.679836	0.0305563	VDH91997.1 U2-associated protein SR140 [Mytilus galloprovincialis]
TRINITY_DN8629_c0_g1_i30	0.679722	0.0305953	VDI35157.1 pyridoxine kinase, partial [Mytilus galloprovincialis]
TRINITY_DN341043_c0_g1_i1	0.679593	0.0306391	VDI14937.1 neuropeptide S receptor 1 [Mytilus galloprovincialis]
TRINITY_DN7179_c0_g1_i2	0.679503	0.03067	VDI24063.1 activating signal cointegrator complex subunit 1 [Mytilus galloprovincialis]
TRINITY_DN12044_c3_g1_i1	0.679402	0.0307042	CAG2251627.1 TRIM2_3 [Mytilus edulis]
TRINITY_DN3673_c1_g1_i8	0.67936	0.0307186	VDI83501.1 oxysterol-binding protein-related protein 9/10/11 [Mytilus galloprovincialis]
TRINITY_DN85022_c0_g1_i1	0.679297	0.0307402	CAG2204397.1 SLC35E2 [Mytilus edulis]
TRINITY_DN21868_c0_g1_i1	0.679295	0.0307409	YP_005089248.1 COX3 gene product [Flustra foliacea]
TRINITY_DN3897_c0_g2_i17	0.679247	0.0307571	CAG2236558.1 GPI2 [Mytilus edulis]
TRINITY_DN306958_c0_g1_i1	0.679138	0.0307945	CAG2210571.1 TUBB [Mytilus edulis]
TRINITY_DN35334_c1_g1_i1	0.679078	0.0308152	CAG2200790.1 CYP4B1 [Mytilus edulis]
TRINITY_DN112948_c0_g1_i1	0.678914	0.0308713	CAG2229533.1 FES [Mytilus edulis]
TRINITY_DN263941_c0_g1_i1	0.678834	0.0308985	VDI08217.1 F-type H+-transporting ATPase subunit alpha, partial [Mytilus galloprovincialis]
TRINITY_DN113690_c0_g2_i1	0.67883	0.0309	CAG2234902.1 K06874 [Mytilus edulis]
TRINITY_DN21266_c0_g1_i1	0.678415	0.0310425	CAG2194670.1 ADP-ribosylation factor-like protein 6-interacting protein 4 [Mytilus edulis]
TRINITY_DN171305_c0_g1_i1	0.677704	0.0312878	CAG2209744.1 MYO1 [Mytilus edulis]
TRINITY_DN15257_c2_g1_i1	0.67756	0.0313377	CAG2193113.1 CS [Mytilus edulis]
TRINITY_DN11525_c0_g1_i5	0.676982	0.031538	VDI17723.1 nicotinate-nucleotide pyrophosphorylase (carboxylating) [Mytilus galloprovincialis]
TRINITY_DN43249_c0_g1_i15	0.676827	0.0315921	CAG2212159.1 FLVCR [Mytilus edulis]
TRINITY_DN42959_c0_g1_i1	0.676749	0.0316193	CAG2198740.1 PSMD6 [Mytilus edulis]
TRINITY_DN33957_c0_g2_i1	0.676603	0.03167	CAG2241577.1 C1QL [Mytilus edulis]
TRINITY_DN70239_c0_g1_i3	0.676506	0.031704	OPL33174.1 phosphatidylcholine protein transfer, partial [Mytilus galloprovincialis]
TRINITY_DN395_c0_g1_i16	0.67644	0.031727	VDH98155.1 ubiquitin-conjugating enzyme E2 F [Mytilus galloprovincialis]
TRINITY_DN58553_c0_g1_i3	0.676355	0.0317568	CAC5426009.1 THOC3 [Mytilus coruscus]
TRINITY_DN27519_c0_g1_i1	0.676284	0.0317816	CAG2204081.1 SLC23A1 [Mytilus edulis]
TRINITY_DN126658_c0_g2_i3	0.676053	0.0318623	CAG2224285.1 STOM [Mytilus edulis]
TRINITY_DN94369_c0_g1_i1	0.676013	0.0318764	VDI53786.1 transcription elongation regulator 1 [Mytilus galloprovincialis]
TRINITY_DN11445_c1_g1_i5	0.675759	0.0319654	CAG2206975.1 ABHD14 [Mytilus edulis]
TRINITY_DN14246_c8_g1_i4	0.675404	0.0320901	VDI68856.1 SNARE-associated protein Snapin [Mytilus galloprovincialis]
TRINITY_DN157423_c2_g1_i2	0.675253	0.0321431	VDI44837.1 translation initiation factor 3 subunit B [Mytilus galloprovincialis]
TRINITY_DN4467_c8_g1_i1	0.675202	0.0321611	VDI40418.1 caspase 7 [Mytilus galloprovincialis]
TRINITY_DN36923_c0_g1_i3	0.675133	0.0321855	VDH97665.1 F-BAR and double SH3 domains protein [Mytilus galloprovincialis]
TRINITY_DN11429_c0_g1_i1	0.675067	0.0322088	CAG2211570.1 CLK2_3 [Mytilus edulis]
TRINITY_DN930_c5_g1_i1	0.674968	0.0322438	CAG2230641.1 Retinal-binding protein [Mytilus edulis]
TRINITY_DN2729_c0_g1_i1	0.674914	0.0322628	CAG2211320.1 MPHOSPH6 [Mytilus edulis]
TRINITY_DN13174_c0_g1_i4	0.674679	0.0323459	VDI66208.1 molybdenum cofactor sulfurtransferase [Mytilus galloprovincialis]
TRINITY_DN130803_c0_g3_i1	0.674603	0.0323726	VDI44030.1 myeloid differentiation primary response protein MyD88, partial [Mytilus galloprovincialis]
TRINITY_DN3868_c0_g1_i1	0.674415	0.0324393	VDI26473.1 Xaa-Pro dipeptidase [Mytilus galloprovincialis]
TRINITY_DN54178_c0_g2_i1	0.674395	0.0324466	CAG2204038.1 NCBE [Mytilus edulis]
TRINITY_DN62088_c0_g1_i2	0.67395	0.0326044	VDI30114.1 choline dehydrogenase [Mytilus galloprovincialis]
TRINITY_DN15170_c0_g1_i21	0.673842	0.0326427	CAG2189632.1 DCXR [Mytilus edulis]
TRINITY_DN30395_c0_g1_i1	0.673752	0.0326749	VDH99514.1 toll-like receptor 2 [Mytilus galloprovincialis]
TRINITY_DN7592_c0_g1_i20	0.673522	0.0327567	VDI45392.1 phosphoglycolate phosphatase [Mytilus galloprovincialis]
TRINITY_DN508_c0_g1_i21	0.673433	0.0327887	CAG2208078.1 DDX39B [Mytilus edulis]
TRINITY_DN372212_c0_g1_i1	0.673211	0.0328678	VDI35065.1 C-type lectin superfamily 17 member A [Mytilus galloprovincialis]
TRINITY_DN127591_c0_g2_i1	0.673207	0.0328692	CAC5396147.1 CCKAR [Mytilus coruscus]
TRINITY_DN361711_c0_g1_i1	0.673202	0.0328712	KAF6024555.1 eIF-4a [Bugula neritina]
TRINITY_DN266772_c0_g1_i1	0.673186	0.032877	CAC5421640.1 NFRKB [Mytilus coruscus]
TRINITY_DN363891_c0_g1_i1	0.673181	0.0328788	KAF6018652.1 RPS12 [Bugula neritina]
TRINITY_DN394746_c0_g1_i1	0.673163	0.0328853	QQP53238.1 uncharacterized protein LOC103506659, partial [Caligus rogercresseyi]
TRINITY_DN395689_c0_g1_i1	0.673114	0.0329025	XP_018086008.1 40S ribosomal protein S29 [Xenopus laevis]
TRINITY_DN33832_c2_g1_i1	0.67309	0.0329111	VDI53572.1 small subunit ribosomal protein S13e, partial [Mytilus galloprovincialis]
TRINITY_DN210704_c0_g1_i1	0.673058	0.0329226	VDI28590.1 NAD+ kinase [Mytilus galloprovincialis]
TRINITY_DN39889_c2_g1_i1	0.672927	0.0329696	OPL33660.1 optic atrophy3 protein, partial [Mytilus galloprovincialis]
TRINITY_DN29728_c0_g1_i5	0.672906	0.0329771	CAC5392974.1 PLXND [Mytilus coruscus]
TRINITY_DN340387_c0_g1_i1	0.672701	0.0330507	VDI25667.1 heterogeneous nuclear ribonucleoprotein F/H [Mytilus galloprovincialis]
TRINITY_DN8442_c7_g1_i1	0.672698	0.0330518	VDI44030.1 myeloid differentiation primary response protein MyD88, partial [Mytilus galloprovincialis]
TRINITY_DN12445_c0_g1_i33	0.67269	0.0330546	OWF49142.1 Guanine nucleotide-binding protein G(I)/G(S)/G(O) subunit gamma-12 [Mizuhopecten yessoensis]
TRINITY_DN201448_c2_g1_i1	0.672647	0.0330699	AKK32405.1 CRP-I12 [Mytilus galloprovincialis]
TRINITY_DN74232_c1_g1_i1	0.672625	0.033078	VDH99785.1 segment polarity protein dishevelled [Mytilus galloprovincialis]
TRINITY_DN219045_c0_g1_i1	0.672605	0.0330853	CAC5393478.1 MAP3K8 [Mytilus coruscus]
TRINITY_DN285082_c0_g1_i1	0.672597	0.0330879	XP_013786490.1 40S ribosomal protein S26-like isoform X1 [Limulus polyphemus]
TRINITY_DN338423_c0_g1_i1	0.672591	0.0330903	VDI13507.1 obscurin-RhoGEF [Mytilus galloprovincialis]
TRINITY_DN344470_c0_g1_i1	0.672586	0.0330921	VDI68381.1 sialic acid binding Ig-like lectin 8 [Mytilus galloprovincialis]
TRINITY_DN227023_c0_g1_i1	0.672583	0.0330929	XP_044178605.1 uncharacterized protein LOC114952318 [Acropora millepora]
TRINITY_DN214532_c0_g1_i1	0.672581	0.0330938	VDI61971.1 translocon-associated protein subunit delta [Mytilus galloprovincialis]
TRINITY_DN9498_c1_g1_i5	0.672515	0.0331175	VDI62659.1 galactosylgalactosylxylosylprotein 3-beta-glucuronosyltransferase 3 [Mytilus galloprovincialis]
TRINITY_DN280014_c0_g1_i1	0.672393	0.0331613	KAF6024554.1 EIF4A2 [Bugula neritina]
TRINITY_DN198543_c1_g2_i1	0.67235	0.0331769	CAC5419928.1 EXT2 [Mytilus coruscus]
TRINITY_DN327621_c0_g1_i1	0.67233	0.033184	KAF6029108.1 RPL4 [Bugula neritina]
TRINITY_DN96262_c0_g1_i1	0.672131	0.0332555	P00000.1 RecName: Full=Defensin gallicin; Flags: Precursor [Mytilus galloprovincialis]
TRINITY_DN47313_c0_g2_i1	0.672131	0.0332557	CAG2185919.1 PSMD4 [Mytilus edulis]
TRINITY_DN49803_c0_g1_i1	0.672031	0.0332919	VDI36167.1 galactoside 2-L-fucosyltransferase 1/2 [Mytilus galloprovincialis]
TRINITY_DN20813_c1_g1_i1	0.671949	0.0333213	XP_028343350.1 tubulin alpha chain, partial [Physeter catodon]
TRINITY_DN2_c6_g1_i2	0.671844	0.0333591	CAG2244790.1 BIRC7_8 [Mytilus edulis]
TRINITY_DN126789_c0_g1_i1	0.671806	0.0333729	ABX44810.1 putative 60S ribosomal protein RPL9, partial [Flustra foliacea]
TRINITY_DN2269_c0_g1_i63	0.671788	0.0333796	CAG2256203.1 BBS7 [Mytilus edulis]
TRINITY_DN62168_c0_g1_i8	0.671664	0.0334242	CAG2231128.1 COPS1 [Mytilus edulis]
TRINITY_DN356295_c0_g1_i1	0.671662	0.0334251	CAG2206036.1 SLC17A5 [Mytilus edulis]
TRINITY_DN29366_c0_g1_i1	0.671615	0.0334422	CAG2199608.1 JOSD [Mytilus edulis]
TRINITY_DN123308_c0_g2_i1	0.671588	0.0334517	CAC5373917.1 PARP10_14_15 [Mytilus coruscus]
TRINITY_DN7296_c0_g1_i34	0.671573	0.0334573	CAC5386533.1 GALNT [Mytilus coruscus]
TRINITY_DN40415_c0_g1_i1	0.67155	0.0334657	KRX81084.1 Tubulin alpha-1 chain, partial [Trichinella pseudospiralis]
TRINITY_DN926_c0_g1_i7	0.67116	0.0336071	CAG2230595.1 Myosin regulatory light chain 12B,Myosin regulatory light polypeptide 9,Calmodulin-B,Myosin regulatory light chain,Calmodulin,Myosin regulatory light chain 2, skeletal muscle isoform type 2,Myosin regulatory light chain LC-2, mantle muscle,Myosin regulatory light chain RLC-A,Calmodulin, flagellar,Myosin regulatory light chain 2A, cardiac muscle isoform,Myosin light chain 5,Myosin reg…
TRINITY_DN5631_c0_g1_i6	0.671065	0.0336415	VDH89077.1 NADH dehydrogenase (ubiquinone) flavoprotein 1 [Mytilus galloprovincialis]
TRINITY_DN330849_c0_g1_i1	0.671037	0.0336515	YP_009407586.1 cytochrome oxidase subunit 3 [Gigantidas platifrons]
TRINITY_DN14149_c0_g1_i3	0.670994	0.0336672	VDI54556.1 lactadherin [Mytilus galloprovincialis]
TRINITY_DN349102_c0_g1_i1	0.670945	0.0336849	ACD65167.1 putative 60S ribosomal protein RPL17 [Phoronis muelleri]
TRINITY_DN162350_c0_g1_i1	0.670936	0.0336883	VDI35215.1 MFS transporter, OCT family, solute carrier family 22 (organic cation transporter), member 4/5 [Mytilus galloprovincialis]
TRINITY_DN107161_c0_g1_i1	0.670819	0.033731	CAC5394705.1 Fibrinogen-like protein A,Ryncolin-4,Angiopoietin-related protein 7,Angiopoietin-related protein 1,Ficolin-1-B,Techylectin-5A,Ficolin-2,Ryncolin-1,Tenascin-R,Fibrinogen-like protein 1,Angiopoietin-1,Tenascin-X,Fibrinogen C domain-containing protein 1-A,Tenascin-N,Veficolin-1,Ryncolin-3,Tenascin,Techylectin-like protein,Fibrinogen C domain-containing protein 1,Fibrinogen gamma chain,R…
TRINITY_DN11301_c0_g1_i10	0.670759	0.0337529	VDI70416.1 solute carrier family 5 (sodium/myo-inositol cotransporter), member 3 [Mytilus galloprovincialis]
TRINITY_DN38761_c1_g1_i1	0.67072	0.0337669	CAG2188447.1 C1QL [Mytilus edulis]
TRINITY_DN1831_c0_g1_i3	0.670676	0.0337828	CAG2244305.1 GSTK1 [Mytilus edulis]
TRINITY_DN352833_c0_g1_i1	0.670647	0.0337934	AEH58057.1 histone variant H2A.X [Mytilus galloprovincialis]
TRINITY_DN6212_c0_g1_i10	0.670561	0.0338248	CAG2196010.1 Hemicentin-1,Coadhesin,Mucin-like protein,Receptor-type tyrosine-protein phosphatase gamma,Tyrosine-protein phosphatase non-receptor type 13,Properdin [Mytilus edulis]
TRINITY_DN157027_c0_g1_i1	0.670545	0.0338306	VDI02418.1 annexin A7/11 [Mytilus galloprovincialis]
TRINITY_DN6739_c0_g1_i1	0.670155	0.0339733	VDH90002.1 ATP-dependent metalloprotease [Mytilus galloprovincialis]
TRINITY_DN11141_c0_g1_i1	0.670123	0.033985	VDI23195.1 insulin receptor [Mytilus galloprovincialis]
TRINITY_DN209447_c0_g1_i1	0.670064	0.0340063	VDI55460.1 ribosome biogenesis protein BRX1 [Mytilus galloprovincialis]
TRINITY_DN179270_c0_g3_i2	0.67006	0.034008	CAG2245909.1 TRIM9_67 [Mytilus edulis]
TRINITY_DN20949_c1_g2_i1	0.670039	0.0340158	VDI14188.1 hemicentin, partial [Mytilus galloprovincialis]
TRINITY_DN648_c0_g2_i1	0.670031	0.0340185	XP_033740824.1 heterogeneous nuclear ribonucleoprotein Q-like isoform X2 [Pecten maximus]
TRINITY_DN231645_c0_g1_i1	0.670002	0.034029	CAC5424065.1 PNO1 [Mytilus coruscus]
TRINITY_DN297235_c0_g1_i1	0.669903	0.0340653	VDI14268.1 glycine hydroxymethyltransferase [Mytilus galloprovincialis]
TRINITY_DN7312_c0_g1_i11	0.669738	0.0341259	VDI14441.1 acylpyruvate hydrolase [Mytilus galloprovincialis]
TRINITY_DN132581_c0_g1_i4	0.669557	0.0341923	VDI66543.1 fasciclin 1 [Mytilus galloprovincialis]
TRINITY_DN7107_c0_g2_i4	0.669433	0.0342378	XP_022310738.1 calmodulin-like protein 4 [Crassostrea virginica]
TRINITY_DN364310_c0_g1_i1	0.669358	0.0342656	CAC5390120.1 Neurogenic locus notch homolog protein 2,Protein eyes shut homolog,Fibropellin-3,Delta-like protein A,Protein crumbs homolog 1,Neurogenic locus Notch protein,Slit homolog 2 protein,Neurogenic locus notch homolog protein 3,Protocadherin Fat 4,Sushi, von Willebrand factor type A, EGF and pentraxin domain-containing protein 1,Delta-like protein C,Fibropellin-1,Delta-like protein B,Prote…
TRINITY_DN2735_c0_g1_i14	0.669153	0.0343411	VDI40996.1 MFS transporter, MCP family, solute carrier family 16 (monocarboxylic acid transporters), member 4 [Mytilus galloprovincialis]
TRINITY_DN43891_c0_g1_i2	0.66911	0.0343567	CAG2231340.1 BIRC2_3 [Mytilus edulis]
TRINITY_DN136717_c0_g1_i1	0.669032	0.0343855	CAG2214305.1 UNKL [Mytilus edulis]
TRINITY_DN10331_c0_g1_i7	0.669029	0.0343866	CAG2236931.1 BRAT1 [Mytilus edulis]
TRINITY_DN17418_c0_g1_i1	0.668998	0.0343982	CAG2205763.1 GUSB [Mytilus edulis]
TRINITY_DN57464_c1_g3_i1	0.668855	0.034451	CAG2187713.1 HMCN [Mytilus edulis]
TRINITY_DN13127_c14_g1_i1	0.668754	0.034488	OPL33660.1 optic atrophy3 protein, partial [Mytilus galloprovincialis]
TRINITY_DN48813_c1_g2_i1	0.668566	0.0345577	VDI38074.1 nucleolin [Mytilus galloprovincialis]
TRINITY_DN138852_c0_g1_i1	0.668546	0.034565	ASB29949.1 NADH dehydrogenase subunit 5 [Gigantidas platifrons]
TRINITY_DN339747_c0_g1_i1	0.668518	0.0345754	XP_034410609.1 eukaryotic translation elongation factor 1 delta a (guanine nucleotide exchange protein) isoform X3 [Cyclopterus lumpus]
TRINITY_DN240493_c0_g1_i1	0.66841	0.0346153	ACF25907.1 crustin-1 [Eriocheir sinensis]
TRINITY_DN19699_c0_g1_i2	0.668371	0.0346299	CAG2185843.1 NDUFA8 [Mytilus edulis]
TRINITY_DN5604_c4_g1_i2	0.667982	0.0347742	VDI21930.1 glycerate 2-kinase [Mytilus galloprovincialis]
TRINITY_DN2433_c2_g1_i10	0.667918	0.0347979	CAG2209420.1 TLR13 [Mytilus edulis]
TRINITY_DN20867_c0_g1_i16	0.667453	0.034971	CAG2248053.1 LRP4 [Mytilus edulis]
TRINITY_DN29664_c0_g1_i1	0.66743	0.0349798	CAG2231830.1 SLC13A2_3_5 [Mytilus edulis]
TRINITY_DN362895_c0_g1_i1	0.667332	0.0350164	CAG2201895.1 SLC32A [Mytilus edulis]
TRINITY_DN73420_c0_g1_i1	0.667053	0.0351205	CAG2233477.1 BIRC7_8 [Mytilus edulis]
TRINITY_DN193687_c0_g1_i1	0.666907	0.0351753	CAG2186752.1 EPS8 [Mytilus edulis]
TRINITY_DN110425_c0_g1_i1	0.666855	0.0351946	XP_022312591.1 uncharacterized protein LOC111117713 [Crassostrea virginica]
TRINITY_DN98144_c0_g1_i1	0.666806	0.0352128	CAC5421624.1 RAD50 [Mytilus coruscus]
TRINITY_DN50241_c0_g1_i1	0.666541	0.0353124	CAG2188792.1 KRAB [Mytilus edulis]
TRINITY_DN23547_c0_g1_i3	0.666414	0.03536	CAG2255858.1 HEXA_B [Mytilus edulis]
TRINITY_DN354292_c0_g1_i1	0.666388	0.03537	XP_031730991.1 peptidyl-prolyl cis-trans isomerase A [Anarrhichthys ocellatus]
TRINITY_DN45004_c0_g1_i3	0.666236	0.0354271	CAG2195638.1 GEMIN6 [Mytilus edulis]
TRINITY_DN150039_c0_g1_i1	0.666229	0.0354297	AVV48227.1 cytochrome c oxidase subunit I [Escharoides angela]
TRINITY_DN389584_c0_g1_i1	0.666153	0.0354581	XP_033104313.1 60S ribosomal protein L8 [Anneissia japonica]
TRINITY_DN11741_c0_g1_i6	0.666152	0.0354586	CAC5384368.1 NTAN1 [Mytilus coruscus]
TRINITY_DN83308_c0_g1_i4	0.666037	0.0355017	CAG2229591.1 PCI domain-containing protein 2,PCI domain-containing protein 2 homolog [Mytilus edulis]
TRINITY_DN33204_c0_g1_i9	0.665967	0.0355284	CAG2221014.1 PHF20 [Mytilus edulis]
TRINITY_DN822_c1_g1_i3	0.665945	0.0355366	CAG2198281.1 FUT1_2 [Mytilus edulis]
TRINITY_DN312263_c0_g1_i2	0.665582	0.0356736	VDH94770.1 prostaglandin-H2 D-isomerase / glutathione transferase [Mytilus galloprovincialis]
TRINITY_DN18796_c3_g2_i2	0.665566	0.0356796	VDI39655.1 D-aspartate oxidase [Mytilus galloprovincialis]
TRINITY_DN54139_c0_g2_i2	0.66551	0.0357008	CAG2200424.1 PLXNA [Mytilus edulis]
TRINITY_DN41272_c0_g1_i11	0.665389	0.0357468	CAG2228565.1 SQOR [Mytilus edulis]
TRINITY_DN180638_c0_g2_i2	0.665029	0.0358832	CAG2238183.1 ASAH1 [Mytilus edulis]
TRINITY_DN24774_c1_g1_i1	0.665023	0.0358852	OPL32649.1 inositol 3-trisphosphate receptor type, partial [Mytilus galloprovincialis]
TRINITY_DN290887_c0_g1_i1	0.664851	0.0359507	AAY66928.1 ribosomal protein L7-like [Ixodes scapularis]
TRINITY_DN32884_c2_g2_i1	0.664843	0.0359537	VDI72998.1 MFS transporter, PAT family, solute carrier family 33 (acetyl-CoA transportor), member 1 [Mytilus galloprovincialis]
TRINITY_DN312867_c0_g1_i1	0.66476	0.0359851	ABX44839.1 putative 60S ribosomal protein RPL36 [Flustra foliacea]
TRINITY_DN3371_c0_g1_i22	0.664674	0.0360182	VDI75707.1 sulfide:quinone oxidoreductase [Mytilus galloprovincialis]
TRINITY_DN39074_c0_g1_i5	0.664657	0.0360244	CAC5418691.1 SUGCT [Mytilus coruscus]
TRINITY_DN9784_c1_g1_i13	0.664312	0.0361561	CAC5381852.1 PFAS [Mytilus coruscus]
TRINITY_DN33476_c2_g1_i3	0.66427	0.0361719	VDI67652.1 midline 1 [Mytilus galloprovincialis]
TRINITY_DN335672_c0_g1_i1	0.664043	0.0362585	ABX44821.1 putative 60S ribosomal protein RPL18A [Flustra foliacea]
TRINITY_DN47397_c0_g1_i3	0.663691	0.0363932	XP_041374195.1 titin-like [Gigantopelta aegis]
TRINITY_DN6950_c12_g1_i1	0.663575	0.0364377	OPL21695.1 serine 2 threonine-protein phosphatase with ef-hands, partial [Mytilus galloprovincialis]
TRINITY_DN350873_c0_g1_i1	0.663383	0.0365114	XP_021364254.1 neurotensin receptor type 1-like [Mizuhopecten yessoensis]
TRINITY_DN4373_c2_g1_i1	0.663364	0.0365188	VDI58419.1 pyruvate carboxylase [Mytilus galloprovincialis]
TRINITY_DN366144_c0_g1_i1	0.663364	0.0365189	CAG2241152.1 GLUL [Mytilus edulis]
TRINITY_DN293662_c0_g1_i1	0.663363	0.0365193	CAG2237466.1 ABC transporter C family member 12,ABC transporter C family member 9,Multidrug resistance-associated protein 1 [Mytilus edulis]
TRINITY_DN391721_c0_g1_i1	0.663356	0.0365218	CAC5409591.1 QCR2 [Mytilus coruscus]
TRINITY_DN343981_c0_g1_i1	0.663324	0.0365343	XP_041370976.1 ATP synthase subunit e, mitochondrial-like [Gigantopelta aegis]
TRINITY_DN20949_c1_g1_i1	0.663294	0.0365455	VDI14188.1 hemicentin, partial [Mytilus galloprovincialis]
TRINITY_DN333534_c0_g1_i1	0.663241	0.0365659	CAC5375606.1 E3.1.1.45 [Mytilus coruscus]
TRINITY_DN20641_c0_g1_i7	0.663197	0.0365829	CAG2191287.1 Ryncolin-2,Angiopoietin-related protein 1,Ryncolin-1,Tenascin-X,Ficolin-2,Tenascin,Ryncolin-3,Angiopoietin-related protein 2,Angiopoietin-4 [Mytilus edulis]
TRINITY_DN385307_c0_g1_i1	0.663177	0.0365908	CAG2233053.1 THAP9 [Mytilus edulis]
TRINITY_DN384822_c0_g1_i1	0.662725	0.0367646	VDI59327.1 tubby-related protein 1 [Mytilus galloprovincialis]
TRINITY_DN111237_c0_g1_i1	0.662702	0.0367735	KAF6040322.1 FTH1 [Bugula neritina]
TRINITY_DN7058_c0_g1_i10	0.662699	0.0367746	VDI52273.1 transaldolase [Mytilus galloprovincialis]
TRINITY_DN17698_c0_g1_i4	0.662457	0.0368683	VDI42447.1 neuromedin U receptor 1 [Mytilus galloprovincialis]
TRINITY_DN160896_c0_g1_i1	0.662333	0.0369163	CAG2252758.1 RGLG [Mytilus edulis]
TRINITY_DN4875_c4_g1_i2	0.662305	0.0369269	CAG2241142.1 VHL [Mytilus edulis]
TRINITY_DN20919_c0_g1_i4	0.662258	0.0369452	XP_033737861.1 probable 3',5'-cyclic phosphodiesterase pde-5 isoform X3 [Pecten maximus]
TRINITY_DN347680_c0_g1_i1	0.661862	0.0370988	CAG2220954.1 EBP [Mytilus edulis]
TRINITY_DN61776_c1_g1_i1	0.661746	0.0371436	XP_034330266.1 uncharacterized protein LOC117690352 [Crassostrea gigas]
TRINITY_DN91632_c0_g1_i1	0.661653	0.0371799	VDI24543.1 solute carrier family 1 (glial high affinity glutamate transporter), member 3 [Mytilus galloprovincialis]
TRINITY_DN330116_c0_g1_i1	0.661538	0.0372246	CAC5393562.1 U2AF2 [Mytilus coruscus]
TRINITY_DN142987_c0_g1_i1	0.661479	0.0372475	ABX44827.1 putative 60S ribosomal protein RPL24 [Flustra foliacea]
TRINITY_DN356299_c0_g1_i1	0.661392	0.0372814	AVY51453.1 elongation factor 1-delta, partial [Deinacrida mahoenui]
TRINITY_DN51719_c0_g3_i1	0.66128	0.0373252	CAG2236110.1 TM9SF3 [Mytilus edulis]
TRINITY_DN128868_c1_g1_i1	0.661247	0.0373381	WP_202786597.1 reverse transcriptase domain-containing protein, partial [Bathymodiolus brooksi thiotrophic gill symbiont]
TRINITY_DN224429_c0_g1_i1	0.661151	0.0373755	CAC5419710.1 SLIT3 [Mytilus coruscus]
TRINITY_DN182722_c0_g1_i1	0.66088	0.0374812	XP_023015240.1 nucleoside diphosphate kinase [Leptinotarsa decemlineata]
TRINITY_DN32777_c0_g2_i1	0.66056	0.0376065	CAG2209840.1 Beta-apo-4'-carotenal oxygenase,Aldehyde dehydrogenase family 3 member B3,Aldehyde dehydrogenase,Aldehyde dehydrogenase family 3 member B2,Fatty aldehyde dehydrogenase,Aldehyde dehydrogenase family 3 member B1,Putative aldehyde dehydrogenase YwdH,Aldehyde dehydrogenase family 3 comG,4,4'-diaponeurosporen-aldehyde dehydrogenase,Aldehyde dehydrogenase family 3 member H1,Aldehyde dehydr…
TRINITY_DN104_c0_g1_i11	0.660538	0.0376151	CAG2255892.1 CAPZA [Mytilus edulis]
TRINITY_DN47173_c3_g1_i1	0.660525	0.0376201	CAG2195278.1 HGD [Mytilus edulis]
TRINITY_DN99295_c0_g4_i2	0.660469	0.037642	CAG2256350.1 CHRNB3 [Mytilus edulis]
TRINITY_DN18085_c3_g1_i3	0.660163	0.0377623	CAG2219464.1 Zinc finger protein 277 [Mytilus edulis]
TRINITY_DN191564_c2_g1_i2	0.660092	0.0377901	OPL33367.1 receptor-type t tyrosine-protein phosphatase, partial [Mytilus galloprovincialis]
TRINITY_DN331685_c0_g1_i1	0.660036	0.037812	VDI71360.1 tripartite motif-containing protein 56 [Mytilus galloprovincialis]
TRINITY_DN1126_c0_g1_i4	0.660029	0.037815	CAG2227571.1 LCMT1 [Mytilus edulis]
TRINITY_DN19615_c0_g1_i3	0.660028	0.0378151	CAG2233565.1 FANCD2 [Mytilus edulis]
TRINITY_DN214365_c0_g1_i5	0.659983	0.0378329	CAG2247182.1 BIRC5 [Mytilus edulis]
TRINITY_DN1544_c0_g1_i10	0.659975	0.037836	CAG2237267.1 VLDLR [Mytilus edulis]
TRINITY_DN194956_c0_g1_i2	0.659931	0.0378533	VDI40517.1 wolfamin [Mytilus galloprovincialis]
TRINITY_DN2948_c0_g1_i13	0.659616	0.0379775	VDI30694.1 tripartite motif-containing protein 45 [Mytilus galloprovincialis]
TRINITY_DN12523_c1_g1_i3	0.659516	0.0380169	VDI59710.1 secretory phospholipase A2 [Mytilus galloprovincialis]
TRINITY_DN10392_c0_g1_i18	0.659511	0.0380188	CAC5389587.1 Osteoclast-stimulating factor 1 [Mytilus coruscus]
TRINITY_DN300148_c0_g1_i1	0.659458	0.0380396	XP_034337328.1 solute carrier family 2, facilitated glucose transporter member 1 isoform X2 [Crassostrea gigas]
TRINITY_DN210108_c0_g1_i1	0.659312	0.0380975	VDH90916.1 BTB/POZ domain-containing protein 16 [Mytilus galloprovincialis]
TRINITY_DN167_c0_g1_i4	0.659242	0.0381253	CAG2236102.1 CES2 [Mytilus edulis]
TRINITY_DN17152_c0_g3_i1	0.659168	0.0381545	CAC5395779.1 LRP4 [Mytilus coruscus]
TRINITY_DN17144_c0_g2_i3	0.659104	0.0381797	VDI75080.1 aminopeptidase O [Mytilus galloprovincialis]
TRINITY_DN73645_c0_g1_i2	0.659065	0.0381953	CAG2230271.1 ALG14 [Mytilus edulis]
TRINITY_DN43324_c1_g1_i1	0.659049	0.0382014	VDI21592.1 sacsin, partial [Mytilus galloprovincialis]
TRINITY_DN698_c0_g1_i2	0.658949	0.038241	CAG2255362.1 BAT1 [Mytilus edulis]
TRINITY_DN8052_c4_g1_i1	0.65892	0.0382527	XP_042338777.1 tubulin alpha chain-like, partial [Plectropomus leopardus]
TRINITY_DN93227_c2_g1_i1	0.658534	0.0384056	VDH89136.1 phosphatidylinositol-4-phosphate 5-kinase-like protein 1 [Mytilus galloprovincialis]
TRINITY_DN51010_c0_g1_i2	0.658187	0.0385437	CAC5406224.1 CLEC17A [Mytilus coruscus]
TRINITY_DN308110_c0_g1_i1	0.658164	0.0385531	CAG2188735.1 Metabotropic glutamate receptor 3,Metabotropic glutamate receptor 2 [Mytilus edulis]
TRINITY_DN334389_c0_g1_i1	0.658074	0.0385888	ABX44834.1 putative 60S ribosomal protein RPL31 [Flustra foliacea]
TRINITY_DN4975_c0_g1_i6	0.657999	0.0386188	CAG2204597.1 Cytochrome P450 4A11,Cytochrome P450 4F22,Cytochrome P450 4A25,Cytochrome P450 4A7,Cytochrome P450 4A24,Cytochrome P450 4A14,Cytochrome P450 4A5,Cytochrome P450 4F1,Cytochrome P450 4F4,Phylloquinone omega-hydroxylase CYP4F2,Taurochenodeoxycholic 6 alpha-hydroxylase,Cytochrome P450 4F5,Cytochrome P450 4F6,Cytochrome P450 4A2,Cytochrome P450 4A4,Cytochrome P450 4A6,Cytochrome P450 4B1,…
TRINITY_DN45853_c0_g1_i1	0.657971	0.0386298	XP_014676676.1 PREDICTED: uncharacterized protein LOC106816566, partial [Priapulus caudatus]
TRINITY_DN48275_c4_g1_i1	0.657549	0.0387986	CAG2249548.1 GPR158 [Mytilus edulis]
TRINITY_DN114030_c0_g2_i1	0.657509	0.0388146	OPL20904.1 n-acetylglucosamine-6-sulfatase precursor, partial [Mytilus galloprovincialis]
TRINITY_DN291846_c0_g1_i1	0.65749	0.0388223	CAG2248899.1 Plasminogen,Hemicentin-1,Coadhesin,Hepatocyte growth factor,Hepatocyte growth factor-like protein [Mytilus edulis]
TRINITY_DN32873_c0_g1_i3	0.657452	0.0388373	VDI17599.1 coiled-coil domain-containing protein 12 [Mytilus galloprovincialis]
TRINITY_DN10570_c0_g1_i1	0.657238	0.038923	VDI79982.1 ATP-dependent Clp protease ATP-binding subunit ClpX [Mytilus galloprovincialis]
TRINITY_DN88310_c0_g1_i1	0.657113	0.0389731	CAG2230620.1 PAXIP1 [Mytilus edulis]
TRINITY_DN65028_c0_g1_i42	0.657065	0.0389923	VDI21335.1 ATP-binding cassette, subfamily C (CFTR/MRP), member 5 [Mytilus galloprovincialis]
TRINITY_DN5129_c1_g1_i3	0.65664	0.0391631	VDI13742.1 molecular chaperone GrpE [Mytilus galloprovincialis]
TRINITY_DN4536_c1_g2_i1	0.656132	0.0393682	SHE22011.1 Exodeoxyribonuclease III [Bathymodiolus brooksi thiotrophic gill symbiont]
TRINITY_DN223003_c0_g1_i1	0.656118	0.0393739	AFI56366.1 isocitrate dehydrogenase [Mytilus galloprovincialis]
TRINITY_DN11726_c0_g2_i1	0.656084	0.0393877	CAG2200612.1 NGB [Mytilus edulis]
TRINITY_DN104627_c0_g1_i1	0.655901	0.0394615	ALL27016.1 HSP90 [Mytilus coruscus]
TRINITY_DN1293_c4_g1_i2	0.65583	0.0394905	VDI56027.1 atypical dual specificity phosphatase [Mytilus galloprovincialis]
TRINITY_DN324875_c0_g1_i1	0.655694	0.0395454	ABX44820.1 putative 60S ribosomal protein RPL18 [Flustra foliacea]
TRINITY_DN304999_c0_g1_i1	0.655469	0.0396368	XP_045162327.1 LOW QUALITY PROTEIN: eukaryotic translation initiation factor 5A-1-like [Mercenaria mercenaria]
TRINITY_DN208092_c0_g1_i1	0.655461	0.0396399	CAG2223147.1 FBXO31 [Mytilus edulis]
TRINITY_DN300761_c0_g1_i1	0.655447	0.0396458	KAF6018229.1 RPS11 [Bugula neritina]
TRINITY_DN371823_c0_g1_i1	0.655429	0.039653	YP_009224013.1 terminase large subunit [Achromobacter phage JWF]
TRINITY_DN312657_c0_g1_i1	0.655422	0.0396558	VDI36982.1 histone-lysine N-methyltransferase MLL5 [Mytilus galloprovincialis]
TRINITY_DN19947_c0_g1_i10	0.65535	0.0396852	CAG2254285.1 HPD [Mytilus edulis]
TRINITY_DN22316_c0_g1_i1	0.655342	0.039688	VDI22057.1 D-dopachrome decarboxylase [Mytilus galloprovincialis]
TRINITY_DN106192_c0_g1_i11	0.655166	0.0397598	OPL21594.1 isoform a, partial [Mytilus galloprovincialis]
TRINITY_DN112648_c0_g1_i1	0.655099	0.039787	KRX92830.1 Calmodulin, partial [Trichinella pseudospiralis]
TRINITY_DN368345_c0_g1_i1	0.655009	0.0398239	CAG2221337.1 PPRC1 [Mytilus edulis]
TRINITY_DN182253_c0_g1_i2	0.654805	0.0399069	XP_034313012.1 uncharacterized protein LOC105337388 isoform X1 [Crassostrea gigas]
TRINITY_DN8962_c0_g1_i2	0.654696	0.0399515	AFP55365.1 D-octopine dehydrogenase, partial [Mytilus edulis]
TRINITY_DN43836_c0_g1_i6	0.654347	0.0400939	CAG2224202.1 G-protein coupled receptor GRL101 [Mytilus edulis]
TRINITY_DN140586_c0_g3_i1	0.654317	0.0401062	CAG2189418.1 SULT1 [Mytilus edulis]
TRINITY_DN2719_c5_g1_i1	0.654167	0.0401674	CAC5399056.1 EIF2B3 [Mytilus coruscus]
TRINITY_DN953_c0_g1_i8	0.65415	0.0401744	CAG2191392.1 PROSC [Mytilus edulis]
TRINITY_DN393251_c0_g1_i1	0.654088	0.0401998	ABX44806.1 putative 60S ribosomal protein RPL6, partial [Flustra foliacea]
TRINITY_DN10238_c0_g1_i20	0.654047	0.0402167	VDI38515.1 solute carrier family 13 (sodium-dependent dicarboxylate transporter), member 2/3/5 [Mytilus galloprovincialis]
TRINITY_DN349079_c0_g1_i1	0.653887	0.0402821	VDI48346.1 solute carrier family 23 (nucleobase transporter), member 1/2 [Mytilus galloprovincialis]
TRINITY_DN261831_c1_g2_i8	0.653825	0.0403077	CAG2220055.1 TUBB [Mytilus edulis]
TRINITY_DN92_c0_g1_i10	0.653785	0.0403241	CAG2199767.1 DPM1 [Mytilus edulis]
TRINITY_DN342321_c0_g1_i1	0.653763	0.040333	ABX44816.1 putative 60S ribosomal protein RPL13A, partial [Flustra foliacea]
TRINITY_DN392423_c0_g1_i1	0.653736	0.0403441	XP_019640800.1 PREDICTED: 60S ribosomal protein L5-like [Branchiostoma belcheri]
TRINITY_DN47316_c0_g1_i1	0.653706	0.0403566	VDH89136.1 phosphatidylinositol-4-phosphate 5-kinase-like protein 1 [Mytilus galloprovincialis]
TRINITY_DN19601_c0_g4_i2	0.6537	0.0403589	VDI53798.1 BTB/POZ domain-containing protein 3/6 [Mytilus galloprovincialis]
TRINITY_DN62012_c0_g2_i2	0.653502	0.0404403	CAG2188817.1 KCNC4 [Mytilus edulis]
TRINITY_DN189695_c0_g1_i1	0.653477	0.0404506	CAG2193230.1 SPATS2-like protein,Spermatogenesis-associated serine-rich protein 2 [Mytilus edulis]
TRINITY_DN17797_c1_g1_i3	0.653397	0.0404838	VDI43247.1 ubiquitin-like protein ATG12 [Mytilus galloprovincialis]
TRINITY_DN88465_c0_g1_i1	0.653223	0.0405553	CAG2217715.1 Sodium- and chloride-dependent GABA transporter 2,Sodium- and chloride-dependent taurine transporter,Sodium-dependent proline transporter,Sodium-and chloride-dependent glycine transporter 2,Sodium- and chloride-dependent GABA transporter 1,Sodium- and chloride-dependent betaine transporter,Sodium- and chloride-dependent neutral and basic amino acid transporter B(0+),Sodium-dependent …
TRINITY_DN63053_c0_g1_i2	0.653205	0.0405628	XP_022304995.1 uncharacterized protein LOC111112012 [Crassostrea virginica]
TRINITY_DN30445_c0_g1_i7	0.653172	0.0405763	VDI15488.1 protein HEXIM1/2 [Mytilus galloprovincialis]
TRINITY_DN197175_c0_g2_i1	0.653007	0.0406445	VDI78293.1 autophagy-related protein 16, animal type [Mytilus galloprovincialis]
TRINITY_DN243499_c0_g1_i1	0.652811	0.0407253	CAC5418448.1 B3GALT1 [Mytilus coruscus]
TRINITY_DN69460_c0_g1_i2	0.652787	0.0407352	VDI29998.1 glutaminase, partial [Mytilus galloprovincialis]
TRINITY_DN19575_c0_g1_i1	0.65274	0.0407547	CAG2218884.1 COL6A [Mytilus edulis]
TRINITY_DN162307_c1_g1_i1	0.652651	0.0407916	VDH94568.1 galactoside 2-L-fucosyltransferase 1/2 [Mytilus galloprovincialis]
TRINITY_DN226783_c0_g1_i1	0.65264	0.0407961	XP_030054904.1 elongation factor 1-alpha 1 [Microcaecilia unicolor]
TRINITY_DN66142_c1_g2_i1	0.652545	0.0408353	CAG2245721.1 TRIM2_3 [Mytilus edulis]
TRINITY_DN1472_c0_g1_i7	0.652453	0.0408736	CAG2189070.1 FLOT [Mytilus edulis]
TRINITY_DN86697_c1_g3_i1	0.652452	0.0408738	CAC5403548.1 MACROD [Mytilus coruscus]
TRINITY_DN43441_c0_g1_i5	0.652424	0.0408858	VDI03605.1 collagen, type VI, alpha [Mytilus galloprovincialis]
TRINITY_DN18001_c1_g1_i1	0.65239	0.0408997	OPL33497.1 neuralized pats1, partial [Mytilus galloprovincialis]
TRINITY_DN79368_c0_g2_i1	0.652327	0.040926	VDI14130.1 phosphatidylinositol 4-kinase A, partial [Mytilus galloprovincialis]
TRINITY_DN26192_c0_g1_i8	0.652308	0.0409335	CAC5373880.1 inx [Mytilus coruscus]
TRINITY_DN2197_c0_g1_i12	0.652251	0.0409572	CAG2196428.1 SLC37A3 [Mytilus edulis]
TRINITY_DN50021_c0_g1_i6	0.652143	0.0410021	CAG2191348.1 FASN [Mytilus edulis]
TRINITY_DN87309_c0_g2_i5	0.652117	0.0410128	VDH91864.1 spermidine synthase [Mytilus galloprovincialis]
TRINITY_DN130315_c0_g1_i2	0.651916	0.0410966	CAG2205750.1 CHS1 [Mytilus edulis]
TRINITY_DN184092_c0_g1_i1	0.651856	0.0411213	CAG2247712.1 GTPase IMAP family member 7 [Mytilus edulis]
TRINITY_DN64695_c0_g1_i23	0.65184	0.0411282	CAC5395626.1 AGAP [Mytilus coruscus]
TRINITY_DN26943_c0_g1_i4	0.651838	0.0411291	VDI23437.1 peroxin-2 [Mytilus galloprovincialis]
TRINITY_DN290131_c0_g1_i1	0.651655	0.0412049	XP_022332709.1 40S ribosomal protein S6-like [Crassostrea virginica]
TRINITY_DN107678_c0_g1_i1	0.651298	0.0413541	KAF6019713.1 RPLP0 [Bugula neritina]
TRINITY_DN7977_c0_g1_i3	0.651139	0.0414205	CAG2236117.1 ABP1 [Mytilus edulis]
TRINITY_DN6786_c0_g1_i1	0.651069	0.0414498	VDI62884.1 TNF receptor-associated factor 4 [Mytilus galloprovincialis]
TRINITY_DN74065_c0_g1_i1	0.650762	0.0415784	CAC5391230.1 CIB2 [Mytilus coruscus]
TRINITY_DN20228_c0_g1_i7	0.650717	0.0415973	CAG2240103.1 PSAP [Mytilus edulis]
TRINITY_DN732_c0_g1_i18	0.650571	0.0416583	CAG2198279.1 FUT1_2 [Mytilus edulis]
TRINITY_DN83339_c0_g1_i2	0.650351	0.041751	VDH98741.1 hairy and enhancer of split 1 [Mytilus galloprovincialis]
TRINITY_DN122479_c0_g1_i9	0.650304	0.0417704	CAC5358654.1 Failed axon connections homolog [Mytilus coruscus]
TRINITY_DN73060_c1_g1_i2	0.65014	0.0418395	CAG2192808.1 DONSON [Mytilus edulis]
TRINITY_DN90096_c0_g1_i2	0.650086	0.0418623	CAG2198175.1 CPEB [Mytilus edulis]
TRINITY_DN9881_c0_g1_i5	0.649935	0.0419261	VDI01781.1 growth arrest and DNA-damage-inducible protein [Mytilus galloprovincialis]
TRINITY_DN320169_c0_g1_i1	0.649644	0.0420486	VDI65093.1 dynein intermediate chain 1, axonemal [Mytilus galloprovincialis]
TRINITY_DN79846_c1_g1_i1	0.649578	0.0420765	OPL21695.1 serine 2 threonine-protein phosphatase with ef-hands, partial [Mytilus galloprovincialis]
TRINITY_DN3353_c1_g1_i3	0.649564	0.0420824	CAG2239090.1 CD220 [Mytilus edulis]
TRINITY_DN101397_c0_g1_i2	0.649308	0.0421906	VDI58510.1 caspase 8 [Mytilus galloprovincialis]
TRINITY_DN201193_c1_g1_i3	0.649182	0.0422443	OPL33367.1 receptor-type t tyrosine-protein phosphatase, partial [Mytilus galloprovincialis]
TRINITY_DN3321_c0_g1_i1	0.649138	0.0422628	CAC5415998.1 PRPF6 [Mytilus coruscus]
TRINITY_DN350979_c0_g1_i1	0.649125	0.0422681	VDI46782.1 hexosaminidase [Mytilus galloprovincialis]
TRINITY_DN9124_c0_g1_i17	0.649106	0.0422765	CAG2206043.1 BRUNOL [Mytilus edulis]
TRINITY_DN13443_c0_g1_i16	0.649087	0.0422845	CAG2220085.1 WD repeat-containing protein 37 [Mytilus edulis]
TRINITY_DN43696_c0_g1_i3	0.649016	0.0423144	CAC5424346.1 PLA2G16 [Mytilus coruscus]
TRINITY_DN56651_c1_g2_i1	0.648921	0.0423549	KAI0212693.1 60S ribosomal protein L10-like [Lamellibrachia satsuma]
TRINITY_DN3149_c0_g1_i5	0.648685	0.0424549	VDI77155.1 tetraspanin-18 [Mytilus galloprovincialis]
TRINITY_DN56835_c0_g1_i6	0.648622	0.0424817	CAG2214858.1 ADAT1 [Mytilus edulis]
TRINITY_DN30437_c0_g2_i1	0.64862	0.0424826	VDI35480.1 medium-chain acyl-[acyl-carrier-protein] hydrolase [Mytilus galloprovincialis]
TRINITY_DN115426_c0_g1_i4	0.648558	0.0425089	CAC5407745.1 ARHGEF3_8 [Mytilus coruscus]
TRINITY_DN82110_c0_g1_i3	0.648272	0.0426308	CAG2232299.1 UAP1 [Mytilus edulis]
TRINITY_DN8416_c0_g1_i2	0.648222	0.042652	VDI71171.1 BBSome-interacting protein 1 [Mytilus galloprovincialis]
TRINITY_DN393583_c0_g1_i1	0.647889	0.0427944	CAG2243865.1 COL6A [Mytilus edulis]
TRINITY_DN58453_c0_g1_i3	0.647815	0.042826	CAG2218500.1 CD206 [Mytilus edulis]
TRINITY_DN30780_c5_g1_i1	0.647801	0.0428318	OPL21695.1 serine 2 threonine-protein phosphatase with ef-hands, partial [Mytilus galloprovincialis]
TRINITY_DN268964_c0_g1_i1	0.647722	0.0428658	VDI54451.1 hemicentin [Mytilus galloprovincialis]
TRINITY_DN60868_c0_g1_i1	0.647548	0.0429402	CAG2189209.1 cphB [Mytilus edulis]
TRINITY_DN10692_c0_g1_i1	0.647302	0.0430456	AHF20933.1 CRP-I 13, partial [Mytilus galloprovincialis]
TRINITY_DN46986_c0_g1_i1	0.647283	0.0430538	OPL33367.1 receptor-type t tyrosine-protein phosphatase, partial [Mytilus galloprovincialis]
TRINITY_DN150274_c0_g1_i1	0.647247	0.0430692	XP_035671722.1 40S ribosomal protein S25 [Branchiostoma floridae]
TRINITY_DN390598_c0_g1_i1	0.647199	0.0430898	ABX44784.1 putative 40S ribosomal protein RPS12 [Flustra foliacea]
TRINITY_DN355714_c0_g1_i1	0.647025	0.0431645	YP_001648407.1 NADH dehydrogenase subunit 5 [Bugula neritina]
TRINITY_DN49348_c0_g1_i2	0.646934	0.0432035	CAC5392222.1 CA2 [Mytilus coruscus]
TRINITY_DN24882_c0_g1_i2	0.64693	0.0432052	VDI21908.1 sn1-specific diacylglycerol lipase [Mytilus galloprovincialis]
TRINITY_DN71582_c0_g1_i7	0.646863	0.043234	CAC5400041.1 SAC2 [Mytilus coruscus]
TRINITY_DN381240_c0_g1_i1	0.646845	0.0432419	YP_005089253.1 COX2 gene product [Flustra foliacea]
TRINITY_DN845_c0_g1_i2	0.646641	0.0433299	CAG2249618.1 STX6 [Mytilus edulis]
TRINITY_DN1514_c0_g1_i11	0.646269	0.0434904	VDI50212.1 echinoid [Mytilus galloprovincialis]
TRINITY_DN4558_c0_g1_i8	0.646256	0.0434961	CAG2201326.1 MARS [Mytilus edulis]
TRINITY_DN80485_c1_g1_i1	0.645802	0.0436925	CAG2246098.1 TRIM2_3 [Mytilus edulis]
TRINITY_DN234936_c0_g1_i1	0.645797	0.0436946	VDI77823.1 cholecystokinin A receptor, partial [Mytilus galloprovincialis]
TRINITY_DN3689_c0_g2_i1	0.645717	0.0437291	CAG2258084.1 SNX3_12 [Mytilus edulis]
TRINITY_DN118736_c0_g1_i1	0.645652	0.0437575	CAG2256351.1 DIS3L2 [Mytilus edulis]
TRINITY_DN31844_c0_g1_i3	0.645634	0.0437651	CAG2248767.1 PHT [Mytilus edulis]
TRINITY_DN4629_c0_g1_i39	0.645604	0.0437784	VDI06685.1 steroid 17alpha-monooxygenase / 17alpha-hydroxyprogesterone aldolase, partial [Mytilus galloprovincialis]
TRINITY_DN112_c3_g1_i15	0.645509	0.0438196	CAC5410936.1 PDE10 [Mytilus coruscus]
TRINITY_DN165380_c0_g2_i1	0.645479	0.0438324	CAC5393797.1 Putative pyridoxal-dependent decarboxylase domain-containing protein 2 [Mytilus coruscus]
TRINITY_DN7605_c0_g1_i27	0.64536	0.0438842	VDI52091.1 metabotropic glutamate receptor 6/7/8 [Mytilus galloprovincialis]
TRINITY_DN153080_c2_g1_i1	0.645138	0.0439806	CAG2216128.1 KRAB [Mytilus edulis]
TRINITY_DN12765_c0_g1_i3	0.644823	0.0441181	XP_014769995.1 PREDICTED: transcription elongation factor 1 homolog [Octopus bimaculoides]
TRINITY_DN152705_c0_g1_i1	0.644798	0.0441289	CAG2206043.1 BRUNOL [Mytilus edulis]
TRINITY_DN379401_c0_g1_i1	0.644772	0.0441402	ABX44775.1 putative 40S ribosomal protein RPS3A [Flustra foliacea]
TRINITY_DN17202_c0_g2_i1	0.644739	0.0441546	VDI40246.1 thiopurine S-methyltransferase, partial [Mytilus galloprovincialis]
TRINITY_DN514_c1_g1_i1	0.64464	0.0441978	VDI02467.1 elongation factor 2 kinase [Mytilus galloprovincialis]
TRINITY_DN4234_c0_g1_i10	0.644602	0.0442144	VDI71787.1 translation initiation factor 4G [Mytilus galloprovincialis]
TRINITY_DN8257_c0_g1_i1	0.644592	0.0442189	VDI41785.1 serine/threonine-protein phosphatase 2A regulatory subunit B'' [Mytilus galloprovincialis]
TRINITY_DN391387_c0_g1_i1	0.644457	0.0442778	CAG2231806.1 NPFFR2 [Mytilus edulis]
TRINITY_DN330614_c0_g1_i1	0.644369	0.0443163	ABX44844.1 putative 60S ribosomal protein RPL39 [Flustra foliacea]
TRINITY_DN83161_c0_g1_i2	0.644312	0.0443413	CAG2246982.1 NAGPA [Mytilus edulis]
TRINITY_DN5423_c0_g1_i20	0.644206	0.0443877	VDI27553.1 DnaJ homolog subfamily B member 6 [Mytilus galloprovincialis]
TRINITY_DN50522_c0_g1_i5	0.643958	0.0444963	VDI64399.1 glycine C-acetyltransferase [Mytilus galloprovincialis]
TRINITY_DN10204_c0_g1_i5	0.643922	0.0445121	VDI58881.1 protein glucosyltransferase [Mytilus galloprovincialis]
TRINITY_DN250433_c0_g1_i1	0.643877	0.0445318	CAG2196332.1 TRIM56 [Mytilus edulis]
TRINITY_DN27923_c0_g1_i5	0.643764	0.0445814	VDI35296.1 anaphase-promoting complex subunit 12 [Mytilus galloprovincialis]
TRINITY_DN3493_c1_g1_i5	0.64364	0.0446359	XP_022345313.1 mediator of RNA polymerase II transcription subunit 21-like [Crassostrea virginica]
TRINITY_DN11904_c0_g1_i3	0.643597	0.044655	VDI28163.1 protein-L-isoaspartate(D-aspartate) O-methyltransferase [Mytilus galloprovincialis]
TRINITY_DN152399_c0_g1_i1	0.643563	0.0446696	OWF44534.1 Xenotropic and polytropic retrovirus receptor 1-like [Mizuhopecten yessoensis]
TRINITY_DN133961_c0_g1_i1	0.643553	0.044674	CAG2258013.1 UAP1 [Mytilus edulis]
TRINITY_DN19784_c0_g1_i2	0.643482	0.0447056	CAC5413033.1 Caveolin-1,Caveolin-3 [Mytilus coruscus]
TRINITY_DN1848_c0_g1_i12	0.643416	0.0447343	CAG2247367.1 COL8A [Mytilus edulis]
TRINITY_DN396_c0_g1_i12	0.643376	0.0447522	CAG2228776.1 DLST [Mytilus edulis]
TRINITY_DN12347_c0_g1_i17	0.643365	0.0447568	CAG2198878.1 ALDH6A1 [Mytilus edulis]
TRINITY_DN165_c2_g1_i22	0.643356	0.0447609	CAC5378560.1 TROVE2 [Mytilus coruscus]
TRINITY_DN76404_c0_g1_i12	0.643338	0.0447689	CAG2228043.1 KSR2 [Mytilus edulis]
TRINITY_DN4707_c0_g1_i12	0.643334	0.0447706	VDH90464.1 myeloid leukemia factor 1 [Mytilus galloprovincialis]
TRINITY_DN144833_c0_g1_i1	0.64316	0.0448472	CAG2194476.1 PTPRT [Mytilus edulis]
TRINITY_DN35445_c0_g1_i2	0.642886	0.0449682	CAG2222746.1 GTPase IMAP family member 4 [Mytilus edulis]
TRINITY_DN140097_c0_g2_i1	0.642835	0.0449906	CAG2231830.1 SLC13A2_3_5 [Mytilus edulis]
TRINITY_DN297656_c0_g1_i1	0.642726	0.0450388	CAG2225870.1 KRAB [Mytilus edulis]
TRINITY_DN297_c0_g1_i1	0.642723	0.0450403	CAG2224317.1 SP4 [Mytilus edulis]
TRINITY_DN10919_c0_g1_i8	0.642707	0.0450472	CAG2247140.1 NmrA-like family domain-containing protein 1 [Mytilus edulis]
TRINITY_DN9842_c0_g1_i5	0.64263	0.0450814	AMK01821.1 PRMT5 [Mytilus galloprovincialis]
TRINITY_DN17649_c0_g1_i1	0.642616	0.0450875	CAC5395030.1 DPP1 [Mytilus coruscus]
TRINITY_DN18496_c0_g1_i17	0.642582	0.0451025	GFO03201.1 Bladder cancer-associated protein [Plakobranchus ocellatus]
TRINITY_DN2199_c0_g1_i21	0.642519	0.0451306	CAC5426636.1 SLC7A9 [Mytilus coruscus]
TRINITY_DN133297_c0_g2_i1	0.642485	0.0451456	AKI87974.1 shell protein-3 [Mytilus coruscus]
TRINITY_DN11368_c0_g1_i1	0.64234	0.0452099	CAG2233438.1 Pyridoxine/pyridoxamine 5'-phosphate oxidase 1, chloroplastic,NAD(P)H-hydrate epimerase,YjeF N-terminal domain-containing protein 3 [Mytilus edulis]
TRINITY_DN334931_c0_g1_i1	0.642223	0.0452617	KAF6019599.1 rbpA [Bugula neritina]
TRINITY_DN314711_c0_g1_i1	0.642196	0.0452738	AJP00032.1 NADH dehydrogenase subunit 4 [Bugula neritina]
TRINITY_DN23881_c0_g1_i17	0.641963	0.0453772	WP_139476139.1 reverse transcriptase domain-containing protein, partial [Bathymodiolus brooksi thiotrophic gill symbiont]
TRINITY_DN126412_c0_g2_i1	0.641888	0.0454105	VDI65227.1 deleted in malignant brain tumors 1 protein [Mytilus galloprovincialis]
TRINITY_DN180228_c0_g2_i2	0.641801	0.0454492	VDH93675.1 2',3'-cyclic-nucleotide 3'-phosphodiesterase [Mytilus galloprovincialis]
TRINITY_DN204790_c0_g1_i1	0.641742	0.0454755	CAC5396875.1 PDE1 [Mytilus coruscus]
TRINITY_DN46217_c0_g1_i3	0.641684	0.0455015	CAG2193141.1 SLC26A6 [Mytilus edulis]
TRINITY_DN34542_c1_g3_i1	0.6416	0.0455389	CAC5419133.1 DHRS1 [Mytilus coruscus]
TRINITY_DN11713_c0_g1_i1	0.641261	0.0456898	VDI55450.1 type I protein arginine methyltransferase [Mytilus galloprovincialis]
TRINITY_DN50237_c3_g1_i2	0.641248	0.0456958	CAG2233081.1 PRKAR [Mytilus edulis]
TRINITY_DN345526_c0_g1_i1	0.641183	0.0457247	XP_022327727.1 uncharacterized protein LOC111127036 [Crassostrea virginica]
TRINITY_DN3425_c6_g1_i2	0.641113	0.0457559	VDH99785.1 segment polarity protein dishevelled [Mytilus galloprovincialis]
TRINITY_DN25256_c0_g2_i1	0.640864	0.0458675	XP_037388861.1 H/ACA ribonucleoprotein complex subunit 3 [Pygocentrus nattereri]
TRINITY_DN5769_c0_g1_i2	0.640804	0.0458943	VDI42684.1 3beta-hydroxy-Delta5-steroid dehydrogenase / steroid Delta-isomerase [Mytilus galloprovincialis]
TRINITY_DN10634_c0_g1_i4	0.640736	0.0459248	CAG2216706.1 NAPEPLD [Mytilus edulis]
TRINITY_DN174544_c0_g1_i1	0.640643	0.0459666	KRY90096.1 Elongation factor 1-alpha [Trichinella pseudospiralis]
TRINITY_DN11029_c2_g1_i1	0.640485	0.0460374	CAC5398354.1 TRPM2 [Mytilus coruscus]
TRINITY_DN37465_c0_g1_i2	0.640429	0.0460622	VDI40728.1 brain-specific angiogenesis inhibitor 3 [Mytilus galloprovincialis]
TRINITY_DN147395_c0_g1_i2	0.640397	0.0460767	VDI78793.1 ammonium transporter, Amt family [Mytilus galloprovincialis]
TRINITY_DN257420_c0_g1_i1	0.640145	0.0461899	XP_018026469.1 PREDICTED: uncharacterized protein LOC108681898 [Hyalella azteca]
TRINITY_DN69863_c0_g1_i5	0.640129	0.0461972	CAG2239399.1 Receptor-type tyrosine-protein phosphatase beta,Tyrosine-protein phosphatase non-receptor type 11,Tyrosine-protein phosphatase non-receptor type 2,Receptor-type tyrosine-protein phosphatase eta [Mytilus edulis]
TRINITY_DN1374_c1_g1_i14	0.639877	0.0463107	XP_021375087.1 cyclin-dependent kinases regulatory subunit-like isoform X2 [Mizuhopecten yessoensis]
TRINITY_DN20905_c0_g1_i16	0.639852	0.0463218	CAG2229139.1 XYLB [Mytilus edulis]
TRINITY_DN138221_c0_g1_i1	0.639843	0.0463262	XP_034335581.1 uncharacterized protein LOC117692252 [Crassostrea gigas]
TRINITY_DN166617_c0_g2_i4	0.639805	0.0463433	VDI68520.1 MFS transporter, OCT family, solute carrier family 22 (organic cation transporter), member 4/5 [Mytilus galloprovincialis]
TRINITY_DN382905_c0_g1_i1	0.639791	0.0463495	CAG2198618.1 ARA54 [Mytilus edulis]
TRINITY_DN64040_c1_g1_i1	0.639745	0.0463703	VDI75704.1 sulfide:quinone oxidoreductase [Mytilus galloprovincialis]
TRINITY_DN251088_c0_g1_i2	0.639621	0.0464263	CAG2230042.1 PARP10_14_15 [Mytilus edulis]
TRINITY_DN4545_c0_g2_i1	0.639557	0.0464552	VDI25454.1 urease accessory protein [Mytilus galloprovincialis]
TRINITY_DN81389_c0_g1_i1	0.639525	0.0464692	CAC5364165.1 MYO5 [Mytilus coruscus]
TRINITY_DN87193_c0_g1_i1	0.639518	0.0464726	CAG2227056.1 USP1 [Mytilus edulis]
TRINITY_DN138664_c0_g1_i1	0.639492	0.0464841	CAC5401215.1 OTUD3 [Mytilus coruscus]
TRINITY_DN168565_c0_g1_i2	0.639325	0.0465599	VDI44029.1 myeloid differentiation primary response protein MyD88, partial [Mytilus galloprovincialis]
TRINITY_DN211641_c0_g1_i1	0.63928	0.0465803	YP_010236204.1 NADH dehydrogenase subunit 2 [Melinna cristata]
TRINITY_DN19449_c0_g1_i12	0.639107	0.0466585	CAG2223649.1 ARL15 [Mytilus edulis]
TRINITY_DN158470_c0_g1_i1	0.639053	0.0466828	YP_009407576.1 NADH dehydrogenase subunit 2 [Gigantidas platifrons]
TRINITY_DN362887_c0_g1_i1	0.638907	0.0467492	VDH98693.1 multiple inositol-polyphosphate phosphatase / 2,3-bisphosphoglycerate 3-phosphatase [Mytilus galloprovincialis]
TRINITY_DN86858_c0_g2_i1	0.638879	0.0467616	OPL21695.1 serine 2 threonine-protein phosphatase with ef-hands, partial [Mytilus galloprovincialis]
TRINITY_DN266694_c0_g1_i1	0.638529	0.0469205	ABX44840.1 putative 60S ribosomal protein RPL36A [Flustra foliacea]
TRINITY_DN197838_c0_g1_i1	0.638485	0.0469405	QAB05311.1 macrophage migration inhibitory factor-like protein [Mytilus galloprovincialis]
TRINITY_DN2438_c0_g2_i1	0.63844	0.046961	CAG2228831.1 SDH1 [Mytilus edulis]
TRINITY_DN3844_c0_g1_i22	0.63834	0.0470067	VDH91605.1 WD repeat and SOCS box-containing protein 1 [Mytilus galloprovincialis]
TRINITY_DN156224_c0_g1_i1	0.638321	0.0470154	QOE35031.1 ATP synthase F0 subunit 6, partial [Nymphon mendosum]
TRINITY_DN5842_c0_g1_i17	0.638283	0.0470325	VDI79535.1 hydroxylamine reductase [Mytilus galloprovincialis]
TRINITY_DN134611_c0_g1_i1	0.638226	0.0470584	CAG2251626.1 PCDHD1 [Mytilus edulis]
TRINITY_DN16093_c0_g1_i15	0.638197	0.0470715	VDI06976.1 selenium-binding protein 1 [Mytilus galloprovincialis]
TRINITY_DN5410_c5_g1_i6	0.638195	0.0470728	VDI63972.1 inositol-hexakisphosphate 5-kinase [Mytilus galloprovincialis]
TRINITY_DN120375_c0_g1_i1	0.638193	0.0470734	AVV48260.1 cytochrome b [Orthoscuticella innominata]
TRINITY_DN57958_c0_g1_i1	0.638137	0.0470989	CAG2197513.1 Alpha-tocopherol transfer protein-like [Mytilus edulis]
TRINITY_DN1896_c1_g1_i19	0.637804	0.0472512	CAG2212477.1 Putative GTP-binding protein 6 [Mytilus edulis]
TRINITY_DN65005_c0_g1_i15	0.637693	0.0473016	CAC5398513.1 HARBI1 [Mytilus coruscus]
TRINITY_DN3186_c0_g1_i1	0.637667	0.0473135	CAG2257498.1 C1D [Mytilus edulis]
TRINITY_DN423_c0_g1_i22	0.637416	0.0474283	CAG2218464.1 Fibronectin type 3 and ankyrin repeat domains protein 1,Fibronectin type 3 and ankyrin repeat domains 1 protein [Mytilus edulis]
TRINITY_DN17264_c0_g1_i1	0.637272	0.0474943	CAG2257389.1 LIM/homeobox protein Lhx2,LIM/homeobox protein Lhx1,LIM/homeobox protein Lhx9,Rhombotin-2,LIM domain transcription factor LMO4.2,LIM domain transcription factor LMO4-A,LIM/homeobox protein Lhx3,LIM domain transcription factor LMO4.1,Protein apterous,LIM domain only protein 3,LIM/homeobox protein Lhx5,LIM/homeobox protein Lhx4,Rhombotin-1,LIM domain transcription factor LMO4,LIM domai…
TRINITY_DN150172_c0_g2_i1	0.637158	0.0475465	ABX44779.1 putative 40S ribosomal protein RPS7 [Flustra foliacea]
TRINITY_DN7235_c0_g1_i33	0.636964	0.0476356	CAG2215935.1 SAP155 [Mytilus edulis]
TRINITY_DN145401_c1_g3_i1	0.636913	0.0476588	CAG2250666.1 E4.1.1.32 [Mytilus edulis]
TRINITY_DN69354_c0_g1_i2	0.636864	0.0476817	CAC5409035.1 Peptidase M20 domain-containing protein 2 [Mytilus coruscus]
TRINITY_DN122009_c0_g4_i1	0.636797	0.0477124	XP_021378782.1 cation-dependent mannose-6-phosphate receptor-like [Mizuhopecten yessoensis]
TRINITY_DN192616_c0_g2_i1	0.636754	0.0477322	XP_033748291.1 uncharacterized protein LOC117333218 [Pecten maximus]
TRINITY_DN26656_c0_g3_i1	0.636613	0.0477969	CAC9626437.1 Branched-chain amino acid ABC transporter, amino acid-binding protein (TC 3.A.1.4.1), partial [uncultured Gammaproteobacteria bacterium]
TRINITY_DN93837_c0_g1_i1	0.636457	0.0478687	CAC5418190.1 PTPRT [Mytilus coruscus]
TRINITY_DN2637_c9_g1_i4	0.636263	0.0479583	VDI54735.1 dual specificity tyrosine-phosphorylation-regulated kinase 2/3/4, partial [Mytilus galloprovincialis]
TRINITY_DN2759_c0_g1_i8	0.636164	0.0480039	VDI83106.1 lipopolysaccharide-induced tumor necrosis factor-alpha factor [Mytilus galloprovincialis]
TRINITY_DN212745_c0_g1_i2	0.636129	0.0480201	AGM32487.1 polyubiquitin-B-like isoform 1 [Coptotermes formosanus]
TRINITY_DN68306_c0_g2_i1	0.635823	0.0481612	XP_046381681.1 40S ribosomal protein S27-like [Haliotis rufescens]
TRINITY_DN155913_c0_g1_i1	0.635779	0.0481817	CAC5388670.1 SAMHD1 [Mytilus coruscus]
TRINITY_DN335738_c0_g1_i1	0.635775	0.0481834	YP_005089260.1 ND1 gene product [Flustra foliacea]
TRINITY_DN292420_c0_g1_i1	0.635656	0.0482384	ABX44815.1 putative 60S ribosomal protein RPL13, partial [Flustra foliacea]
TRINITY_DN52966_c0_g1_i1	0.635655	0.0482393	VDI69126.1 sacsin [Mytilus galloprovincialis]
TRINITY_DN72715_c0_g2_i2	0.635592	0.0482681	XP_045162157.1 uncharacterized protein LOC123526969 [Mercenaria mercenaria]
TRINITY_DN191759_c0_g1_i2	0.6355	0.0483109	CAC5383919.1 CLCN7 [Mytilus coruscus]
TRINITY_DN178479_c0_g1_i1	0.635397	0.0483585	CAG2252272.1 ANKRD50 [Mytilus edulis]
TRINITY_DN293082_c0_g1_i1	0.635266	0.0484193	CAG2210116.1 Sarcoplasmic calcium-binding protein [Mytilus edulis]
TRINITY_DN252078_c0_g1_i1	0.635219	0.0484414	CAG2228083.1 TARBP1 [Mytilus edulis]
TRINITY_DN14466_c0_g1_i10	0.635134	0.0484805	CAC5408529.1 PHB2 [Mytilus coruscus]
TRINITY_DN203185_c0_g1_i2	0.635056	0.0485171	CAG2193686.1 MAO [Mytilus edulis]
TRINITY_DN87492_c0_g1_i1	0.635027	0.0485304	CAG2215299.1 BIRC7_8 [Mytilus edulis]
TRINITY_DN78472_c0_g1_i1	0.635017	0.0485351	YP_009503523.1 NADH dehydrogenase subunit 3 [Pectinatella magnifica]
TRINITY_DN195078_c1_g1_i1	0.63494	0.0485708	CAG2216952.1 ARL13B [Mytilus edulis]
TRINITY_DN11547_c0_g1_i1	0.634828	0.0486229	XP_011416798.2 uncharacterized protein LOC105320535 [Crassostrea gigas]
TRINITY_DN49696_c0_g1_i1	0.634791	0.04864	CAC5421897.1 Tyrosine-protein kinase receptor Tie-1,Tyrosine-protein kinase Shark,Melanoma receptor tyrosine-protein kinase,Ack-related non-receptor tyrosine kinase,Tyrosine-protein kinase ZAP-70,Vascular endothelial growth factor receptor 1,Receptor tyrosine-protein kinase erbB-4,Tyrosine-protein kinase SYK,Tyrosine-protein kinase Fer [Mytilus coruscus]
TRINITY_DN74590_c0_g3_i1	0.634623	0.0487184	CAG2228341.1 ANKRD54 [Mytilus edulis]
TRINITY_DN105781_c0_g3_i1	0.634503	0.0487743	CAC5418222.1 PCSK5 [Mytilus coruscus]
TRINITY_DN277597_c0_g3_i1	0.634459	0.0487949	MBV2113429.1 RNA-directed DNA polymerase [Candidatus Thiodiazotropha taylori]
TRINITY_DN12358_c0_g1_i14	0.634367	0.048838	CAG2220710.1 PNKD [Mytilus edulis]
TRINITY_DN10486_c3_g1_i2	0.634311	0.0488639	CAG2192319.1 AQP8 [Mytilus edulis]
TRINITY_DN21053_c0_g1_i6	0.634074	0.0489748	XP_034326028.1 uncharacterized protein LOC117689325 [Crassostrea gigas]
TRINITY_DN60044_c0_g1_i1	0.633948	0.0490336	CAG2250931.1 HPS5 [Mytilus edulis]
TRINITY_DN16266_c5_g1_i4	0.633735	0.0491334	VDI44030.1 myeloid differentiation primary response protein MyD88, partial [Mytilus galloprovincialis]
TRINITY_DN76265_c0_g1_i1	0.633728	0.0491366	CAG2204397.1 SLC35E2 [Mytilus edulis]
TRINITY_DN103438_c0_g1_i10	0.633707	0.0491468	VDI46855.1 ribonuclease H2 subunit C [Mytilus galloprovincialis]
TRINITY_DN9209_c1_g1_i6	0.633689	0.0491551	XP_022340762.1 immunoglobulin superfamily member 10-like [Crassostrea virginica]
TRINITY_DN45345_c0_g1_i5	0.633635	0.0491804	CAG2210431.1 Beta-1,4-galactosyltransferase 1,Beta-1,4-galactosyltransferase 3,Beta-1,4-galactosyltransferase 5,Beta-1,4-galactosyltransferase 6 [Mytilus edulis]
TRINITY_DN6347_c1_g1_i2	0.633621	0.0491868	CAG2223846.1 Alternative oxidase, mitochondrial,Ubiquinol oxidase 1c, mitochondrial,Ubiquinol oxidase 1, mitochondrial,Alternative oxidase 3, mitochondrial,Alternative oxidase 1, mitochondrial,Ubiquinol oxidase 2, mitochondrial,Ubiquinol oxidase 1a, mitochondrial,Ubiquinol oxidase 3, mitochondrial,Alternative oxidase 2, mitochondrial,Ubiquinol oxidase, mitochondrial,Ubiquinol oxidase 1b, mitochon…
TRINITY_DN306171_c0_g1_i1	0.633584	0.0492044	CAG2209310.1 ADAM17 [Mytilus edulis]
TRINITY_DN54206_c0_g1_i11	0.633331	0.049323	CAC5383713.1 LRP2 [Mytilus coruscus]
TRINITY_DN2242_c2_g1_i10	0.633069	0.0494464	CAG2220791.1 HAAO [Mytilus edulis]
TRINITY_DN346985_c0_g1_i1	0.633024	0.0494674	CAC5367957.1 DPYS [Mytilus coruscus]
TRINITY_DN32315_c5_g1_i1	0.632958	0.0494984	CAC5355596.1 MYH [Mytilus coruscus]
TRINITY_DN36834_c0_g1_i5	0.632905	0.0495236	CAG2207638.1 MYOF [Mytilus edulis]
TRINITY_DN147617_c2_g1_i2	0.632894	0.0495287	CAG2226086.1 CYP3A [Mytilus edulis]
TRINITY_DN41558_c0_g1_i3	0.632827	0.0495601	VDH89937.1 MFS transporter, MCP family, solute carrier family 16 (monocarboxylic acid transporters), member 12 [Mytilus galloprovincialis]
TRINITY_DN3507_c3_g1_i1	0.632791	0.0495773	QGJ03708.1 alpha-tubulin, partial [Sarcophaga dux]
TRINITY_DN382744_c0_g1_i1	0.632743	0.0495998	ABX44822.1 putative 60S ribosomal protein RPL19 [Flustra foliacea]
TRINITY_DN122493_c0_g1_i2	0.632704	0.0496183	CAG2245058.1 CHST15 [Mytilus edulis]
TRINITY_DN5582_c4_g1_i1	0.632674	0.0496326	VDI24334.1 tenascin [Mytilus galloprovincialis]
TRINITY_DN13327_c0_g1_i10	0.632657	0.0496406	VDI49678.1 glutathione S-transferase [Mytilus galloprovincialis]
TRINITY_DN322294_c0_g1_i1	0.632554	0.0496889	CAC5392321.1 frmA [Mytilus coruscus]
TRINITY_DN8833_c0_g1_i5	0.632544	0.0496938	CAG2241933.1 FUT1_2 [Mytilus edulis]
TRINITY_DN312033_c0_g1_i1	0.632422	0.0497513	XP_034328412.1 neurogenic locus notch homolog protein 2-like [Crassostrea gigas]
TRINITY_DN21728_c0_g1_i11	0.632129	0.04989	CAG2246596.1 RTN4IP1 [Mytilus edulis]
TRINITY_DN94511_c0_g1_i1	0.632016	0.0499437	CAG2226890.1 BORCS5 [Mytilus edulis]
TRINITY_DN100299_c0_g1_i1	0.631973	0.049964	WP_180337572.1 reverse transcriptase domain-containing protein [Bathymodiolus brooksi thiotrophic gill symbiont]
TRINITY_DN13682_c1_g1_i15	0.631768	0.0500611	CAC5393307.1 PIGN [Mytilus coruscus]
TRINITY_DN39560_c0_g1_i1	0.631617	0.0501328	VDI24551.1 receptor-type tyrosine-protein phosphatase kappa, partial [Mytilus galloprovincialis]
TRINITY_DN347293_c0_g1_i1	0.631567	0.0501565	KAF6019249.1 RPL12 [Bugula neritina]
TRINITY_DN2820_c0_g1_i10	0.631552	0.0501638	VDI77941.1 cleavage stimulation factor subunit 1 [Mytilus galloprovincialis]
TRINITY_DN7279_c0_g1_i15	0.631521	0.0501786	VDI45148.1 solute carrier family 36 (proton-coupled amino acid transporter) [Mytilus galloprovincialis]
TRINITY_DN58179_c0_g1_i1	0.631498	0.0501892	ABX44826.1 putative 60S ribosomal protein RPL23A [Flustra foliacea]
TRINITY_DN241_c0_g1_i8	0.631408	0.050232	CAG2240156.1 EIF2B5 [Mytilus edulis]
TRINITY_DN4_c0_g3_i2	0.631377	0.0502468	OPL33367.1 receptor-type t tyrosine-protein phosphatase, partial [Mytilus galloprovincialis]
TRINITY_DN6819_c1_g1_i6	0.631377	0.0502469	VDI60200.1 dual specificity phosphatase 3 [Mytilus galloprovincialis]
TRINITY_DN27174_c0_g1_i2	0.631303	0.0502821	VDI18337.1 DNA mismatch repair protein PMS2 [Mytilus galloprovincialis]
TRINITY_DN37029_c0_g2_i1	0.631197	0.0503328	OPL33660.1 optic atrophy3 protein, partial [Mytilus galloprovincialis]
TRINITY_DN90970_c0_g1_i1	0.630991	0.0504309	CAG2195375.1 Putative helicase mov-10-B.2,Helicase MOV-10,Putative helicase mov-10-B.1,Probable RNA helicase SDE3,Probable RNA helicase armi,RNA helicase Mov10l1,Putative helicase MOV-10 [Mytilus edulis]
TRINITY_DN1794_c0_g1_i2	0.630917	0.050466	VDI64503.1 beta-1,4-mannosyltransferase [Mytilus galloprovincialis]
TRINITY_DN13101_c0_g3_i1	0.630809	0.0505177	CBM41041.1 fibrinogen-related protein 2 [Mytilus galloprovincialis]
TRINITY_DN79346_c0_g2_i1	0.630673	0.0505828	VDI11521.1 discs large protein 4 [Mytilus galloprovincialis]
TRINITY_DN205516_c0_g1_i1	0.630664	0.050587	CAG2236528.1 RHOB [Mytilus edulis]
TRINITY_DN149154_c0_g1_i1	0.630517	0.050657	CAG2189701.1 PLXNA [Mytilus edulis]
TRINITY_DN106429_c0_g1_i2	0.630467	0.0506809	CAG2249327.1 BRUNOL [Mytilus edulis]
TRINITY_DN53745_c0_g1_i1	0.630413	0.0507071	CAG2231809.1 TRIM56 [Mytilus edulis]
TRINITY_DN146385_c0_g2_i4	0.630375	0.050725	VDI50844.1 lipoyl(octanoyl) transferase [Mytilus galloprovincialis]
TRINITY_DN83878_c0_g1_i1	0.63032	0.0507513	VDI74365.1 protocadherin delta 1 [Mytilus galloprovincialis]
TRINITY_DN67567_c4_g1_i2	0.630112	0.050851	CAG2188094.1 LRP4 [Mytilus edulis]
TRINITY_DN347308_c0_g1_i1	0.630112	0.0508511	CAG2215994.1 CYC1 [Mytilus edulis]
TRINITY_DN27445_c0_g1_i1	0.630072	0.0508705	CAG2257198.1 ntrX [Mytilus edulis]
TRINITY_DN12136_c0_g1_i5	0.62997	0.0509194	VDI54450.1 hemicentin [Mytilus galloprovincialis]
TRINITY_DN2208_c0_g1_i6	0.629906	0.0509498	VDI05889.1 galactoside 2-L-fucosyltransferase 1/2 [Mytilus galloprovincialis]
TRINITY_DN113434_c0_g1_i1	0.629883	0.0509611	AHF20922.1 CRP-I 2 [Mytilus galloprovincialis]
TRINITY_DN13768_c0_g1_i1	0.629766	0.0510172	VDH89586.1 20S proteasome subunit beta 3 [Mytilus galloprovincialis]
TRINITY_DN48627_c0_g1_i2	0.629575	0.0511089	CAG2196894.1 SAE1 [Mytilus edulis]
TRINITY_DN629_c0_g2_i1	0.629509	0.051141	CAG2216539.1 P4HA [Mytilus edulis]
TRINITY_DN2646_c0_g1_i1	0.629149	0.0513143	VDH98093.1 deoxyribonuclease V [Mytilus galloprovincialis]
TRINITY_DN10688_c0_g1_i8	0.629124	0.0513264	CAG2197317.1 CCT2 [Mytilus edulis]
TRINITY_DN354540_c0_g1_i1	0.629052	0.0513612	ABX44811.1 putative 60S ribosomal protein RPL10 [Flustra foliacea]
TRINITY_DN349299_c0_g1_i1	0.62871	0.0515262	ASB29955.1 NADH dehydrogenase subunit 4 [Gigantidas platifrons]
TRINITY_DN87627_c0_g1_i1	0.628703	0.0515298	CAG2186930.1 CAP [Mytilus edulis]
TRINITY_DN26313_c1_g1_i1	0.628626	0.0515668	CAG2196150.1 LRP5_6 [Mytilus edulis]
TRINITY_DN22266_c0_g1_i4	0.628624	0.0515677	CAG2221675.1 STRA6 [Mytilus edulis]
TRINITY_DN5634_c0_g1_i8	0.628585	0.0515866	CAG2228059.1 FUT1_2 [Mytilus edulis]
TRINITY_DN192176_c0_g1_i1	0.628517	0.0516197	AIJ27192.1 mitochondrial ATP synthatase subunit beta, partial [Mytilus galloprovincialis]
TRINITY_DN149842_c0_g1_i1	0.628493	0.0516314	CAG2187967.1 MYLK [Mytilus edulis]
TRINITY_DN181662_c1_g1_i1	0.628411	0.0516709	ABX44774.1 putative 40S ribosomal protein RPS3, partial [Flustra foliacea]
TRINITY_DN238405_c0_g1_i1	0.628307	0.0517215	OBU83476.1 30S ribosomal protein S15, partial [Enterococcus faecium]
TRINITY_DN89031_c0_g1_i2	0.628225	0.0517612	CAG2255053.1 MRPS9 [Mytilus edulis]
TRINITY_DN14633_c0_g1_i1	0.628176	0.0517851	CAG2213089.1 ESA1 [Mytilus edulis]
TRINITY_DN50303_c0_g1_i5	0.628146	0.0517999	CAC5382808.1 CHRNA7 [Mytilus coruscus]
TRINITY_DN16889_c0_g1_i1	0.628017	0.0518621	VDI07136.1 enoyl-CoA hydratase / long-chain 3-hydroxyacyl-CoA dehydrogenase [Mytilus galloprovincialis]
TRINITY_DN85_c4_g1_i1	0.627567	0.052081	CAG2220631.1 MRPS12 [Mytilus edulis]
TRINITY_DN51746_c0_g1_i6	0.627561	0.0520844	XP_022322996.1 uncharacterized protein LOC111124436 [Crassostrea virginica]
TRINITY_DN59958_c1_g3_i1	0.627528	0.0521004	CAC5406270.1 IGSF11 [Mytilus coruscus]
TRINITY_DN64567_c0_g1_i1	0.627461	0.0521331	CAG2188820.1 CPM [Mytilus edulis]
TRINITY_DN113499_c0_g2_i8	0.62733	0.0521968	CAC5410648.1 CERK [Mytilus coruscus]
TRINITY_DN106495_c0_g1_i1	0.627233	0.0522441	VDI34309.1 gamma-glutamyltranspeptidase / glutathione hydrolase / leukotriene-C4 hydrolase [Mytilus galloprovincialis]
TRINITY_DN10308_c0_g1_i1	0.626761	0.052475	CAC5361194.1 MEGF10_11 [Mytilus coruscus]
TRINITY_DN33063_c0_g1_i2	0.626721	0.0524947	CAC5393999.1 DIS3L [Mytilus coruscus]
TRINITY_DN370585_c0_g1_i1	0.626305	0.0526985	VDI67219.1 blast:Mu-type opioid receptor [Mytilus galloprovincialis]
TRINITY_DN198583_c0_g1_i1	0.626303	0.0526996	WP_180337589.1 reverse transcriptase domain-containing protein, partial [Bathymodiolus brooksi thiotrophic gill symbiont]
TRINITY_DN73172_c0_g1_i1	0.626227	0.0527368	CAC5388596.1 RP-L7e [Mytilus coruscus]
TRINITY_DN30149_c0_g1_i1	0.626205	0.0527478	VDI02051.1 tachykinin-like receptor [Mytilus galloprovincialis]
TRINITY_DN15464_c0_g1_i7	0.626187	0.0527566	CAG2249891.1 Motile sperm domain-containing protein 1 [Mytilus edulis]
TRINITY_DN105654_c0_g1_i1	0.625747	0.0529731	VDI62827.1 PAB-dependent poly(A)-specific ribonuclease subunit 3 [Mytilus galloprovincialis]
TRINITY_DN156493_c0_g1_i1	0.625743	0.0529749	CAG2195617.1 M6PR [Mytilus edulis]
TRINITY_DN18706_c0_g1_i2	0.625736	0.0529782	CAG2206038.1 Cytochrome P450 2C31,Cytochrome P450 2D6 [Mytilus edulis]
TRINITY_DN236469_c0_g1_i2	0.625662	0.0530148	AKS48148.1 carbonic anhydrase-like protein, partial [Mytilus coruscus]
TRINITY_DN130856_c0_g1_i1	0.625634	0.0530285	XP_046367408.1 tubulin beta chain-like [Haliotis rufescens]
TRINITY_DN4448_c2_g2_i5	0.625583	0.0530537	CAG2217309.1 GLIS2 [Mytilus edulis]
TRINITY_DN63676_c0_g1_i2	0.625568	0.0530614	CAG2245611.1 GRIN2B [Mytilus edulis]
TRINITY_DN212269_c0_g1_i1	0.625145	0.0532702	VDH89071.1 ribosome biogenesis protein BMS1 [Mytilus galloprovincialis]
TRINITY_DN105045_c1_g2_i2	0.625025	0.0533296	CAC5399298.1 Putative ankyrin repeat protein L93 [Mytilus coruscus]
TRINITY_DN24206_c0_g1_i5	0.625023	0.0533306	VDI10086.1 alpha-N-acetylglucosaminidase [Mytilus galloprovincialis]
TRINITY_DN334896_c0_g1_i1	0.625016	0.0533341	CAG2188116.1 BARHL [Mytilus edulis]
TRINITY_DN13764_c0_g1_i15	0.624583	0.0535484	VDI14808.1 ankyrin repeat and SOCS box protein 13 [Mytilus galloprovincialis]
TRINITY_DN166405_c0_g1_i1	0.624498	0.0535908	CAG2244778.1 PCDHD1 [Mytilus edulis]
TRINITY_DN316819_c0_g1_i1	0.624468	0.0536056	ABX44789.1 putative 40S ribosomal protein RPS16 [Flustra foliacea]
TRINITY_DN145997_c0_g1_i1	0.624331	0.0536739	VDI77404.1 protocadherin Fat 4, partial [Mytilus galloprovincialis]
TRINITY_DN44411_c0_g3_i1	0.624296	0.0536909	OPL33122.1 insulin receptor-like, partial [Mytilus galloprovincialis]
TRINITY_DN37599_c0_g1_i1	0.624258	0.0537101	CAG2235644.1 NFX1-type zinc finger-containing protein 1 [Mytilus edulis]
TRINITY_DN96385_c0_g1_i1	0.624095	0.0537911	CAC5373138.1 MYBPC1 [Mytilus coruscus]
TRINITY_DN5851_c0_g1_i1	0.624051	0.0538132	CAG2200726.1 INPP5A [Mytilus edulis]
TRINITY_DN300410_c0_g1_i1	0.624001	0.0538381	XP_014676742.1 PREDICTED: uncharacterized protein LOC106816632 [Priapulus caudatus]
TRINITY_DN133014_c0_g2_i1	0.623898	0.0538894	XP_005855606.1 transcript antisense to ribosomal rna protein [Nannochloropsis gaditana CCMP526]
TRINITY_DN383058_c0_g1_i1	0.623896	0.05389	CAG2245054.1 Protein TANC2,Protein TANC1 [Mytilus edulis]
TRINITY_DN56223_c0_g1_i2	0.623736	0.0539702	CAG2247218.1 Tyrosine-protein phosphatase 1,Phosphatidylinositol phosphatase PTPRQ,Tyrosine-protein phosphatase non-receptor type 7,Receptor-type tyrosine-protein phosphatase R,Tyrosine-protein phosphatase non-receptor type 13,Tyrosine-protein phosphatase non-receptor type 5,Tyrosine-protein phosphatase non-receptor type 11,Tyrosine-protein phosphatase corkscrew,Receptor-type tyrosine-protein pho…
TRINITY_DN298386_c0_g1_i1	0.623713	0.0539814	CAC5423920.1 Beta-1,4-N-acetylgalactosaminyltransferase bre-4,Beta-1,4-galactosyltransferase 1,Beta-1,4-galactosyltransferase 2,Beta-1,4-galactosyltransferase 3,Beta-1,4-galactosyltransferase 6,Beta-1,4-galactosyltransferase 5,Beta-1,4-galactosyltransferase 4 [Mytilus coruscus]
TRINITY_DN115795_c0_g1_i1	0.623706	0.0539847	CAG2215308.1 VPS13A_C [Mytilus edulis]
TRINITY_DN229806_c0_g1_i1	0.62369	0.053993	VDI63232.1 cyclic AMP-responsive element-binding protein 3 [Mytilus galloprovincialis]
TRINITY_DN78610_c0_g1_i1	0.623664	0.054006	CAG2257482.1 DSL1 [Mytilus edulis]
TRINITY_DN250512_c0_g1_i1	0.623664	0.0540061	CAG2219575.1 BCRP2 [Mytilus edulis]
TRINITY_DN362261_c0_g1_i1	0.623657	0.0540093	XP_021346387.1 NAD(P) transhydrogenase, mitochondrial-like [Mizuhopecten yessoensis]
TRINITY_DN390439_c0_g1_i1	0.623629	0.0540235	VDH96253.1 E3 SUMO-protein ligase RanBP2 [Mytilus galloprovincialis]
TRINITY_DN199757_c0_g1_i1	0.623603	0.0540362	VDI81457.1 blast:Transposon TX1 uncharacterized 149 kDa protein [Mytilus galloprovincialis]
TRINITY_DN10677_c9_g1_i1	0.623574	0.0540509	CAG2210753.1 TRIM2_3 [Mytilus edulis]
TRINITY_DN261773_c0_g1_i1	0.623557	0.0540594	CAG2215229.1 DDK1 [Mytilus edulis]
TRINITY_DN154122_c0_g1_i1	0.623507	0.0540844	CAG2220080.1 EOGT [Mytilus edulis]
TRINITY_DN251943_c0_g1_i1	0.623492	0.0540916	CAC5418063.1 C1QL [Mytilus coruscus]
TRINITY_DN11508_c0_g3_i7	0.623458	0.0541087	CAG2198009.1 sucD [Mytilus edulis]
TRINITY_DN287086_c0_g1_i1	0.623447	0.0541145	VDI64505.1 myosin XV [Mytilus galloprovincialis]
TRINITY_DN256706_c1_g1_i1	0.623347	0.0541645	OPL20981.1 receptor-type kappa tyrosine-protein phosphatase, partial [Mytilus galloprovincialis]
TRINITY_DN164076_c0_g1_i4	0.623274	0.0542007	CAG2216930.1 RNF213 [Mytilus edulis]
TRINITY_DN13004_c0_g1_i20	0.623149	0.0542633	VDI79072.1 tRNA-dihydrouridine synthase 2 [Mytilus galloprovincialis]
TRINITY_DN205591_c0_g1_i2	0.623101	0.0542874	VDI59327.1 tubby-related protein 1 [Mytilus galloprovincialis]
TRINITY_DN10848_c2_g1_i15	0.623015	0.0543305	VDI27159.1 serine/threonine-protein kinase/endoribonuclease IRE1 [Mytilus galloprovincialis]
TRINITY_DN53202_c0_g2_i3	0.622938	0.0543689	XP_045180852.1 uncharacterized protein LOC123540121 [Mercenaria mercenaria]
TRINITY_DN87396_c0_g1_i1	0.622868	0.0544039	CAG2227517.1 DPP3 [Mytilus edulis]
TRINITY_DN78151_c0_g1_i1	0.622771	0.054453	XP_023932779.1 uncharacterized protein LOC106158290 [Lingula anatina]
TRINITY_DN390735_c0_g1_i1	0.622472	0.054603	CAG2255921.1 Kelch-like protein 20,Kelch-like protein 38,Kelch-like protein 28,Kelch-like protein 24,Kelch-like protein diablo [Mytilus edulis]
TRINITY_DN32349_c0_g1_i2	0.621948	0.0548668	CAG2185601.1 USP25 [Mytilus edulis]
TRINITY_DN10435_c0_g1_i6	0.621921	0.0548807	VDI00454.1 glutathione S-transferase [Mytilus galloprovincialis]
TRINITY_DN299468_c0_g1_i1	0.621819	0.0549317	VDI79978.1 ATP-dependent DNA helicase RecQ [Mytilus galloprovincialis]
TRINITY_DN3969_c0_g1_i18	0.621719	0.0549826	VDI05291.1 Ras-related protein Rab-32 [Mytilus galloprovincialis]
TRINITY_DN4224_c0_g1_i2	0.621483	0.0551019	CAC5396339.1 E4.1.1.32 [Mytilus coruscus]
TRINITY_DN158719_c0_g1_i2	0.621281	0.055204	CAC5397123.1 CYP17A [Mytilus coruscus]
TRINITY_DN165785_c0_g2_i1	0.621223	0.0552331	XP_021357951.1 uncharacterized protein LOC110453360 [Mizuhopecten yessoensis]
TRINITY_DN80734_c0_g1_i6	0.621217	0.0552366	CAG2237046.1 PCSK5 [Mytilus edulis]
TRINITY_DN79208_c0_g2_i5	0.621084	0.0553036	XP_037402655.1 T-lymphocyte activation antigen CD80-like [Pygocentrus nattereri]
TRINITY_DN34305_c0_g2_i4	0.621082	0.0553049	CAG2229075.1 AIMP2 [Mytilus edulis]
TRINITY_DN231232_c0_g1_i1	0.620627	0.0555359	CAC5389719.1 PCDHD1 [Mytilus coruscus]
TRINITY_DN186233_c0_g2_i1	0.620627	0.0555359	CAC5383684.1 Fibrinogen-like protein 1,Fibrinogen-like protein A,Angiopoietin-4,Angiopoietin-related protein 6,Techylectin-5B,Angiopoietin-related protein 7,Ficolin-1-A,Angiopoietin-related protein 1,Ficolin-1-B,Ficolin-2,Ficolin-3,Ficolin-1,Fibrinogen C domain-containing protein 1 [Mytilus coruscus]
TRINITY_DN297344_c0_g1_i1	0.620627	0.0555359	CDW81432.1 t-complex protein 1 subunit alpha-like [Stylonychia lemnae]
TRINITY_DN97450_c0_g1_i1	0.620627	0.0555359	XP_045188138.1 uncharacterized protein LOC123546015 [Mercenaria mercenaria]
TRINITY_DN70579_c0_g1_i1	0.620627	0.0555359	CAC5399662.1 TOR1 [Mytilus coruscus]
TRINITY_DN300147_c0_g1_i1	0.620627	0.0555359	WP_124105307.1 M3 family oligoendopeptidase [Thermus thermophilus]
TRINITY_DN309710_c0_g1_i1	0.620627	0.0555359	AYI98300.1 elongation factor 1a, partial [Ourapteryx sp. 5 RC-2018]
TRINITY_DN344469_c0_g1_i1	0.620627	0.0555359	KHN71241.1 Protein disulfide-isomerase 2 [Toxocara canis]
TRINITY_DN172460_c1_g1_i1	0.620627	0.0555359	VDI81458.1 blast:Transposon TX1 uncharacterized 149 kDa protein [Mytilus galloprovincialis]
TRINITY_DN260770_c0_g1_i1	0.620627	0.0555359	CAD5111408.1 DgyrCDS718 [Dimorphilus gyrociliatus]
TRINITY_DN358571_c0_g1_i1	0.620627	0.0555359	WP_136651365.1 Stf0 family sulphotransferase [Paracoccus aeridis]
TRINITY_DN182917_c0_g1_i1	0.620627	0.0555359	CAC5376345.1 GBE1 [Mytilus coruscus]
TRINITY_DN342407_c0_g1_i1	0.620627	0.0555359	KAF8998339.1 metacaspase [Hymenopellis radicata]
TRINITY_DN247053_c0_g1_i1	0.620627	0.0555359	ABX44772.1 putative 40S ribosomal protein RPSA, partial [Flustra foliacea]
TRINITY_DN382742_c0_g1_i1	0.620627	0.0555359	GFS25523.1 synaptosomal-associated protein [Elysia marginata]
TRINITY_DN220372_c0_g1_i1	0.620627	0.0555359	VDI29641.1 dimethylaniline monooxygenase (N-oxide forming) [Mytilus galloprovincialis]
TRINITY_DN373675_c0_g1_i1	0.620627	0.0555359	RYY35028.1 30S ribosomal protein S17 [archaeon]
TRINITY_DN368214_c0_g1_i1	0.620627	0.0555359	WP_200848798.1 urate hydroxylase PuuD, partial [Raoultella sp. 18093]
TRINITY_DN316571_c0_g1_i1	0.620627	0.0555359	CDW83774.1 40s ribosomal protein s25-1 [Stylonychia lemnae]
TRINITY_DN377165_c0_g1_i1	0.620627	0.0555359	XP_012895283.1 uncharacterized protein [Blastocystis hominis]
TRINITY_DN384965_c0_g1_i1	0.620627	0.0555359	NOZ72211.1 potassium transporter TrkA [Chloroflexi bacterium]
TRINITY_DN340921_c0_g1_i1	0.620627	0.0555359	WP_136883332.1 DUF917 domain-containing protein [Rhizobium pusense]
TRINITY_DN380302_c0_g1_i1	0.620627	0.0555359	CAG2229084.1 TLR13 [Mytilus edulis]
TRINITY_DN372362_c0_g1_i1	0.620627	0.0555359	KAG5180809.1 Sec1-like protein [Tribonema minus]
TRINITY_DN385790_c0_g1_i1	0.620627	0.0555359	KAG9431970.1 basement membrane-specific heparan sulfate proteoglycan core protein isoform X25 [Apis mellifera carnica]
TRINITY_DN234657_c0_g2_i1	0.620627	0.0555359	XP_002165854.1 60S ribosomal protein L10a [Hydra vulgaris]
TRINITY_DN394055_c0_g1_i1	0.620627	0.0555359	CAC5425575.1 Galectin-4,Galectin-9 [Mytilus coruscus]
TRINITY_DN351577_c0_g1_i1	0.620627	0.0555359	WP_082860721.1 AI-2E family transporter [Azospirillum humicireducens]
TRINITY_DN48853_c0_g2_i1	0.620627	0.0555359	CAC5410398.1 SLC27A2 [Mytilus coruscus]
TRINITY_DN40155_c0_g2_i1	0.620627	0.0555359	VDI60662.1 furin [Mytilus galloprovincialis]
TRINITY_DN391928_c0_g1_i1	0.620627	0.0555359	KAF6024906.1 vlc [Bugula neritina]
TRINITY_DN282837_c0_g1_i1	0.620627	0.0555359	WP_088477716.1 amidohydrolase [Micrococcus sp. FDAARGOS_333]
TRINITY_DN79605_c2_g1_i1	0.620627	0.0555359	XP_030862963.1 T-complex protein 1 subunit zeta [Gorilla gorilla gorilla]
TRINITY_DN389587_c0_g1_i1	0.620627	0.0555359	WP_084806326.1 Bug family tripartite tricarboxylate transporter substrate binding protein [Bradyrhizobium sp. NAS80.1]
TRINITY_DN351116_c0_g1_i1	0.620627	0.0555359	XP_045121483.1 aldehyde dehydrogenase family 3 member A2-like [Portunus trituberculatus]
TRINITY_DN272187_c0_g1_i1	0.620627	0.0555359	XP_022328361.1 ubiquitin carboxyl-terminal hydrolase-like [Crassostrea virginica]
TRINITY_DN359389_c0_g1_i1	0.620627	0.0555359	CAG2231384.1 CHS1 [Mytilus edulis]
TRINITY_DN272384_c0_g1_i1	0.620627	0.0555359	KAF6032557.1 PKD2 [Bugula neritina]
TRINITY_DN388613_c0_g1_i1	0.620627	0.0555359	XP_045207104.1 LOW QUALITY PROTEIN: fibrillin-1-like [Mercenaria mercenaria]
TRINITY_DN363941_c0_g1_i1	0.620627	0.0555359	ABX44825.1 putative 60S ribosomal protein RPL23 [Flustra foliacea]
TRINITY_DN235379_c0_g1_i1	0.620627	0.0555359	VDI31151.1 solute carrier family 27 (fatty acid transporter), member 1/4 [Mytilus galloprovincialis]
TRINITY_DN343801_c0_g1_i1	0.620627	0.0555359	CAC5387623.1 CASP2 [Mytilus coruscus]
TRINITY_DN387913_c0_g1_i1	0.620627	0.0555359	KAF3614410.1 Eukaryotic translation initiation factor 3 subunit C [Capsicum annuum]
TRINITY_DN287846_c0_g1_i1	0.620627	0.0555359	CAC5378849.1 KCNC1 [Mytilus coruscus]
TRINITY_DN202461_c0_g1_i2	0.620627	0.0555359	CAC5375134.1 TRPM5 [Mytilus coruscus]
TRINITY_DN290731_c0_g1_i1	0.620627	0.0555359	XP_022245326.1 transcriptional repressor p66-beta-like isoform X2 [Limulus polyphemus]
TRINITY_DN92899_c0_g1_i2	0.620627	0.0555359	CAG2228744.1 SEC24 [Mytilus edulis]
TRINITY_DN370358_c0_g1_i1	0.620627	0.0555359	WP_088817414.1 Na+/H+ antiporter subunit D [Kytococcus aerolatus]
TRINITY_DN309357_c0_g1_i1	0.620627	0.0555359	XP_019626582.1 PREDICTED: mucin-5AC-like [Branchiostoma belcheri]
TRINITY_DN225974_c0_g3_i1	0.620627	0.0555359	O97484.1 RecName: Full=Histone H2B [Moneuplotes crassus]
TRINITY_DN334820_c0_g1_i1	0.620627	0.0555359	HHV12588.1 FtsX-like permease family protein [Clostridiales bacterium]
TRINITY_DN99511_c0_g1_i1	0.620627	0.0555359	CAG2217476.1 CD29 [Mytilus edulis]
TRINITY_DN89375_c0_g1_i1	0.620627	0.0555359	CAG2249430.1 CNOT1 [Mytilus edulis]
TRINITY_DN317118_c0_g1_i1	0.620627	0.0555359	CAG2193401.1 CD109 [Mytilus edulis]
TRINITY_DN269121_c1_g1_i1	0.620627	0.0555359	XP_025039737.1 caspase-14-like isoform X1 [Pelodiscus sinensis]
TRINITY_DN342335_c0_g1_i1	0.620627	0.0555359	ADK34016.1 glutathione S-transferase, partial [Prionchulus punctatus]
TRINITY_DN366728_c0_g1_i1	0.620627	0.0555359	ALF04303.1 calmodulin, partial [Trypanosoma cruzi]
TRINITY_DN292949_c0_g1_i1	0.620627	0.0555359	KAH3745627.1 guanine nucleotide-binding protein alpha-1 subunit [Pelomyxa schiedti]
TRINITY_DN175014_c1_g1_i1	0.620627	0.0555359	XP_045202242.1 uncharacterized protein LOC123555715 [Mercenaria mercenaria]
TRINITY_DN350797_c0_g1_i1	0.620627	0.0555359	MBC7652497.1 M28 family peptidase [Deinococcales bacterium]
TRINITY_DN388580_c0_g1_i1	0.620627	0.0555359	CAG2224118.1 KRAB [Mytilus edulis]
TRINITY_DN145997_c0_g2_i1	0.620627	0.0555359	VDI77404.1 protocadherin Fat 4, partial [Mytilus galloprovincialis]
TRINITY_DN331903_c0_g1_i1	0.620627	0.0555359	WP_064955582.1 LacI family DNA-binding transcriptional regulator [Microbacterium arborescens]
TRINITY_DN272471_c0_g1_i1	0.620627	0.0555359	CAC5379193.1 PNKD [Mytilus coruscus]
TRINITY_DN259999_c0_g1_i1	0.620627	0.0555359	XP_041379667.1 LOW QUALITY PROTEIN: uncharacterized protein LOC121392585 [Gigantopelta aegis]
TRINITY_DN308818_c0_g1_i1	0.620627	0.0555359	GAE75033.1 ADP-ribose pyrophosphatase [Cutibacterium acnes JCM 18918]
TRINITY_DN260243_c0_g2_i1	0.620627	0.0555359	CAG2240751.1 TTN [Mytilus edulis]
TRINITY_DN319077_c0_g1_i1	0.620627	0.0555359	WP_158492573.1 YifB family Mg chelatase-like AAA ATPase [Micrococcus luteus]
TRINITY_DN52457_c4_g1_i1	0.620627	0.0555359	CAC5415934.1 Zinc transporter ZIP6,Zinc transporter foi,Zinc transporter ZIP10 [Mytilus coruscus]
TRINITY_DN208971_c0_g1_i1	0.620627	0.0555359	CAG2218917.1 Translin [Mytilus edulis]
TRINITY_DN344362_c0_g1_i1	0.620627	0.0555359	XP_045582961.1 ankyrin repeat domain-containing protein 17-like isoform X6 [Procambarus clarkii]
TRINITY_DN320209_c0_g1_i1	0.620627	0.0555359	CAC5389037.1 FBXL2_20 [Mytilus coruscus]
TRINITY_DN98246_c0_g1_i1	0.620627	0.0555359	VDI16902.1 probable 2-oxoglutarate dehydrogenase E1 component DHKTD1 [Mytilus galloprovincialis]
TRINITY_DN362215_c0_g1_i1	0.620627	0.0555359	ABZ04217.1 ribosomal protein rpl4, partial [Lineus viridis]
TRINITY_DN135000_c2_g1_i4	0.620627	0.0555359	VDI37159.1 solute carrier family 13 (sodium-dependent dicarboxylate transporter), member 2/3/5, partial [Mytilus galloprovincialis]
TRINITY_DN374171_c0_g1_i1	0.620627	0.0555359	XP_023932663.1 uncharacterized protein LOC106163538 [Lingula anatina]
TRINITY_DN120420_c0_g1_i1	0.620627	0.0555359	VDI71003.1 E3 SUMO-protein ligase RanBP2 [Mytilus galloprovincialis]
TRINITY_DN351502_c0_g1_i1	0.620627	0.0555359	CDW85839.1 uv excision repair protein [Stylonychia lemnae]
TRINITY_DN334085_c0_g1_i1	0.620627	0.0555359	WP_067188407.1 MULTISPECIES: preprotein translocase subunit SecY [Micrococcus]
TRINITY_DN352510_c0_g1_i1	0.620627	0.0555359	MBY0311979.1 ribonuclease III [Phycisphaerales bacterium]
TRINITY_DN126922_c0_g1_i1	0.620627	0.0555359	CAG2237465.1 ABCC3 [Mytilus edulis]
TRINITY_DN213755_c0_g3_i1	0.620627	0.0555359	CAG2215817.1 ANK [Mytilus edulis]
TRINITY_DN363547_c0_g1_i1	0.620627	0.0555359	KAH7078967.1 Alpha/Beta hydrolase protein [Paraphoma chrysanthemicola]
TRINITY_DN333141_c0_g1_i1	0.620627	0.0555359	WP_025071750.1 membrane dipeptidase [Prevotella timonensis]
TRINITY_DN194899_c0_g1_i1	0.620627	0.0555359	VDH91573.1 KISS1 receptor [Mytilus galloprovincialis]
TRINITY_DN82564_c1_g1_i1	0.620627	0.0555359	CAC5373864.1 ANK [Mytilus coruscus]
TRINITY_DN213499_c0_g1_i1	0.620627	0.0555359	CCG06602.1 Putative uncharacterized protein, partial [Pararhodospirillum photometricum DSM 122]
TRINITY_DN288555_c0_g1_i1	0.620627	0.0555359	GFN86729.1 40S ribosomal protein s5 [Plakobranchus ocellatus]
TRINITY_DN386123_c0_g1_i1	0.620627	0.0555359	KNG52246.1 transport protein sec23 protein [Stemphylium lycopersici]
TRINITY_DN364244_c0_g1_i1	0.620627	0.0555359	XP_039249474.1 uncharacterized protein LOC120327137 [Styela clava]
TRINITY_DN216624_c0_g1_i1	0.620627	0.0555359	XP_008025188.1 uncharacterized protein SETTUDRAFT_153328 [Exserohilum turcica Et28A]
TRINITY_DN292326_c0_g1_i1	0.620627	0.0555359	VDI71438.1 blast:Probable RNA-directed DNA polymerase from transposon BS [Mytilus galloprovincialis]
TRINITY_DN380445_c0_g1_i1	0.620627	0.0555359	CAC5398129.1 CUBN [Mytilus coruscus]
TRINITY_DN395512_c0_g1_i1	0.620627	0.0555359	HBK00322.1 xanthine dehydrogenase [Delftia acidovorans]
TRINITY_DN351243_c0_g1_i1	0.620627	0.0555359	XP_007700984.1 uncharacterized protein COCSADRAFT_37762 [Bipolaris sorokiniana ND90Pr]
TRINITY_DN295890_c0_g1_i1	0.620627	0.0555359	KAF6036382.1 SIX4 [Bugula neritina]
TRINITY_DN250560_c0_g1_i1	0.620627	0.0555359	VDH90311.1 toll-like receptor 13 [Mytilus galloprovincialis]
TRINITY_DN118846_c0_g1_i1	0.620627	0.0555359	CAG2188145.1 ABCC1 [Mytilus edulis]
TRINITY_DN349642_c0_g1_i1	0.620627	0.0555359	WP_147504406.1 DUF1725 domain-containing protein [Acinetobacter baumannii]
TRINITY_DN343296_c0_g1_i1	0.620627	0.0555359	XP_039264371.1 protein DD3-3-like [Styela clava]
TRINITY_DN340192_c0_g1_i1	0.620627	0.0555359	XP_044586255.1 neuroglian isoform X4 [Cotesia glomerata]
TRINITY_DN106379_c0_g1_i1	0.620627	0.0555359	CAG2186876.1 Ral GTPase-activating protein subunit beta [Mytilus edulis]
TRINITY_DN375244_c0_g1_i1	0.620627	0.0555359	WP_010397697.1 MULTISPECIES: hybrid sensor histidine kinase/response regulator [Paracoccus]
TRINITY_DN66216_c0_g1_i1	0.620627	0.0555359	CAC5419658.1 GTPase IMAP family member 4,GTPase IMAP family member 7 [Mytilus coruscus]
TRINITY_DN303221_c0_g1_i1	0.620627	0.0555359	WP_054433791.1 MULTISPECIES: COX15/CtaA family protein [Achromobacter]
TRINITY_DN338099_c0_g1_i1	0.620627	0.0555359	KHJ46023.1 ribosomal L18p/L5e family protein [Trichuris suis]
TRINITY_DN326025_c0_g1_i1	0.620627	0.0555359	CAG2219559.1 4-hydroxybutyrate coenzyme A transferase [Mytilus edulis]
TRINITY_DN71162_c1_g1_i2	0.620627	0.0555359	CAG2254839.1 HMCN [Mytilus edulis]
TRINITY_DN193300_c2_g1_i1	0.620627	0.0555359	XP_021378782.1 cation-dependent mannose-6-phosphate receptor-like [Mizuhopecten yessoensis]
TRINITY_DN359716_c0_g1_i1	0.620627	0.0555359	OWF51983.1 Protocadherin Fat 4 [Mizuhopecten yessoensis]
TRINITY_DN376930_c0_g1_i1	0.620627	0.0555359	XP_004987871.1 ligase III [Salpingoeca rosetta]
TRINITY_DN312810_c0_g1_i1	0.620627	0.0555359	VDI33702.1 ATP-binding cassette, subfamily A (ABC1), member 5 [Mytilus galloprovincialis]
TRINITY_DN307710_c0_g1_i1	0.620627	0.0555359	KTT73631.1 dehydrogenase [Sphingomonas endophytica]
TRINITY_DN194487_c0_g1_i1	0.620627	0.0555359	CAG2236637.1 TTN [Mytilus edulis]
TRINITY_DN309034_c0_g1_i1	0.620627	0.0555359	XP_024925943.1 uncharacterized protein LOC112490430, partial [Ziziphus jujuba]
TRINITY_DN322165_c0_g1_i1	0.620627	0.0555359	XP_646310.1 major vault protein [Dictyostelium discoideum AX4]
TRINITY_DN328251_c0_g1_i1	0.620627	0.0555359	AAP93822.1 actin, partial [Procryptobia sorokini]
TRINITY_DN73103_c1_g1_i1	0.620627	0.0555359	CAG2247530.1 MHC2 [Mytilus edulis]
TRINITY_DN320410_c0_g1_i1	0.620627	0.0555359	SHE22451.1 Exodeoxyribonuclease III [Bathymodiolus brooksi thiotrophic gill symbiont]
TRINITY_DN344729_c0_g1_i1	0.620627	0.0555359	QLA09634.1 60S large subunit ribosomal protein eL33 [Euglena gracilis]
TRINITY_DN285489_c0_g1_i1	0.620627	0.0555359	CAG8823569.1 11355_t:CDS:1, partial [Gigaspora rosea]
TRINITY_DN379150_c0_g1_i1	0.620627	0.0555359	CAG2242100.1 SLC5A6 [Mytilus edulis]
TRINITY_DN207127_c0_g1_i1	0.620627	0.0555359	XP_011632701.1 zinc metalloproteinase nas-4-like [Pogonomyrmex barbatus]
TRINITY_DN373243_c0_g1_i1	0.620627	0.0555359	WP_168613926.1 cytochrome c oxidase subunit 4 [Rothia terrae]
TRINITY_DN5514_c3_g1_i1	0.620627	0.0555359	VDI62794.1 peptidoglycan recognition protein [Mytilus galloprovincialis]
TRINITY_DN185185_c0_g1_i1	0.620627	0.0555359	CAG2188048.1 ADH5 [Mytilus edulis]
TRINITY_DN304112_c0_g1_i1	0.620627	0.0555359	XP_045133330.1 triosephosphate isomerase-like [Portunus trituberculatus]
TRINITY_DN42942_c2_g1_i1	0.620627	0.0555359	XP_023242554.1 zinc finger E-box-binding homeobox 1-like isoform X2 [Centruroides sculpturatus]
TRINITY_DN318177_c0_g1_i1	0.620627	0.0555359	EDL16067.1 mCG13229 [Mus musculus]
TRINITY_DN379113_c0_g1_i1	0.620627	0.0555359	WP_010397548.1 iron ABC transporter permease [Paracoccus sp. TRP]
TRINITY_DN13526_c0_g2_i1	0.620627	0.0555359	VDI35340.1 baculoviral IAP repeat-containing protein 2/3 [Mytilus galloprovincialis]
TRINITY_DN213263_c0_g2_i1	0.620627	0.0555359	EFN72447.1 SPARC-related modular calcium-binding protein 1 [Camponotus floridanus]
TRINITY_DN76924_c0_g2_i1	0.620627	0.0555359	CAC5377219.1 Fibrinogen-like protein A,Ryncolin-4,Angiopoietin-related protein 7,Angiopoietin-related protein 1,Ficolin-3,Ficolin-1-B,Ficolin-2,Ryncolin-1,Tenascin-R,Fibrinogen-like protein 1,Angiopoietin-1,Tenascin-X,Fibrinogen C domain-containing protein 1-A,Tenascin-N,Ryncolin-3,Tenascin,Fibroleukin,Fibrinogen C domain-containing protein 1,Ryncolin-2,Angiopoietin-related protein 6,Techylectin-…
TRINITY_DN298628_c0_g1_i1	0.620627	0.0555359	VDI33047.1 solute carrier family 23 (nucleobase transporter), member 1/2, partial [Mytilus galloprovincialis]
TRINITY_DN173226_c0_g3_i1	0.620627	0.0555359	XP_021374365.1 perlucin-like protein [Mizuhopecten yessoensis]
TRINITY_DN288430_c0_g1_i1	0.620627	0.0555359	CAC5380544.1 Protein serrate,Protein eyes shut homolog,Neurogenic locus Notch protein,Protein delta homolog 1,Neurogenic locus notch homolog protein 3,Protein eyes shut,Delta-like protein C,Protein slit,Neurogenic locus notch homolog protein 1,Fibropellin-3,Protein crumbs homolog 2,Sushi, nidogen and EGF-like domain-containing protein 1,Sushi, von Willebrand factor type A, EGF and pentraxin domai…
TRINITY_DN218122_c0_g1_i1	0.620627	0.0555359	VDI25530.1 ankyrin repeat domain-containing protein 17 [Mytilus galloprovincialis]
TRINITY_DN344563_c0_g1_i1	0.620627	0.0555359	TFL01593.1 tRNA synthetases class I-domain-containing protein [Pterula gracilis]
TRINITY_DN381551_c0_g1_i1	0.620627	0.0555359	CAC5426327.1 MYOF [Mytilus coruscus]
TRINITY_DN48848_c1_g1_i1	0.620627	0.0555359	KAG8522312.1 Heat shock cognate 71 kDa protein, partial [Galemys pyrenaicus]
TRINITY_DN334564_c0_g1_i1	0.620627	0.0555359	XP_013890906.1 40S ribosomal protein S4-C [Monoraphidium neglectum]
TRINITY_DN254143_c0_g1_i1	0.620627	0.0555359	WP_206392208.1 DEAD/DEAH box helicase, partial [Kocuria palustris]
TRINITY_DN205458_c0_g1_i1	0.620627	0.0555359	BAN15882.1 ATP6 synthase, partial [Gallus gallus]
TRINITY_DN226850_c0_g1_i1	0.620627	0.0555359	CDW77203.1 60s ribosomal protein l3 [Stylonychia lemnae]
TRINITY_DN300544_c0_g1_i1	0.620627	0.0555359	AJQ21517.1 MACPF domain-containing protein 2 [Mytilus galloprovincialis]
TRINITY_DN28437_c1_g1_i4	0.620627	0.0555359	CAC5404062.1 IGSF9B [Mytilus coruscus]
TRINITY_DN305906_c0_g1_i1	0.620627	0.0555359	XP_044555121.1 uncharacterized protein C9374_009804 [Naegleria lovaniensis]
TRINITY_DN132757_c0_g1_i1	0.620627	0.0555359	CAG2228830.1 BAG3 [Mytilus edulis]
TRINITY_DN351058_c0_g1_i1	0.620627	0.0555359	WP_126281899.1 helix-turn-helix domain-containing protein [Roseomonas sp. FDAARGOS_362]
TRINITY_DN382855_c0_g1_i1	0.620627	0.0555359	CDW74601.1 UNKNOWN [Stylonychia lemnae]
TRINITY_DN215751_c0_g2_i1	0.620627	0.0555359	CAC5383939.1 DTX [Mytilus coruscus]
TRINITY_DN356822_c0_g1_i1	0.620627	0.0555359	WP_197286696.1 FecR domain-containing protein [Achromobacter sp. 2789STDY5608615]
TRINITY_DN384192_c0_g1_i1	0.620627	0.0555359	WP_136219139.1 FAD-dependent oxidoreductase [Massilia sp. Mn16-1_5]
TRINITY_DN255920_c0_g1_i1	0.620627	0.0555359	CAC5375769.1 BTBD3_6 [Mytilus coruscus]
TRINITY_DN1_c51_g2_i1	0.620627	0.0555359	OPL33367.1 receptor-type t tyrosine-protein phosphatase, partial [Mytilus galloprovincialis]
TRINITY_DN231454_c0_g1_i1	0.620627	0.0555359	GFH59340.1 ribosomal protein S17 component of cytosolic 80S ribosome and 40S small subunit [Chaetoceros tenuissimus]
TRINITY_DN335978_c0_g1_i1	0.620627	0.0555359	WP_241146726.1 murein biosynthesis integral membrane protein MurJ [Amnimonas aquatica]
TRINITY_DN359288_c0_g1_i1	0.620627	0.0555359	EBK2344004.1 3-deoxy-8-phosphooctulonate synthase [Salmonella enterica subsp. enterica serovar Enteritidis]
TRINITY_DN342421_c0_g1_i1	0.620627	0.0555359	XP_034322685.1 uncharacterized protein LOC117688643 [Crassostrea gigas]
TRINITY_DN388384_c0_g1_i1	0.620627	0.0555359	WP_128115524.1 tetratricopeptide repeat protein [Brevundimonas diminuta]
TRINITY_DN186166_c0_g1_i1	0.620627	0.0555359	CAG2213544.1 AGPAT6 [Mytilus edulis]
TRINITY_DN344500_c0_g1_i1	0.620627	0.0555359	XP_045602865.1 28S ribosomal protein S11, mitochondrial-like [Procambarus clarkii]
TRINITY_DN292492_c0_g1_i1	0.620627	0.0555359	XP_020893276.1 60S ribosomal protein L13 [Exaiptasia diaphana]
TRINITY_DN310979_c0_g1_i1	0.620627	0.0555359	KAF6019063.1 Chd64 [Bugula neritina]
TRINITY_DN189430_c1_g1_i1	0.620627	0.0555359	WP_180337660.1 transposase [Bathymodiolus brooksi thiotrophic gill symbiont]
TRINITY_DN309528_c0_g1_i1	0.620627	0.0555359	XP_006618074.2 LOW QUALITY PROTEIN: uncharacterized protein LOC102679631 [Apis dorsata]
TRINITY_DN349067_c0_g1_i1	0.620627	0.0555359	HBO6784285.1 efflux RND transporter periplasmic adaptor subunit [Pseudomonas aeruginosa]
TRINITY_DN370949_c0_g1_i1	0.620627	0.0555359	CDJ83926.1 Peptidase A1 domain containing protein [Haemonchus contortus]
TRINITY_DN108632_c0_g2_i1	0.620627	0.0555359	AAC78081.1 alpha tubulin, partial [Trypanosoma cruzi]
TRINITY_DN137482_c0_g1_i1	0.620627	0.0555359	CAG2238015.1 ECM29 [Mytilus edulis]
TRINITY_DN152720_c0_g2_i1	0.620627	0.0555359	CAC5401314.1 TRIM2_3 [Mytilus coruscus]
TRINITY_DN319648_c0_g1_i1	0.620627	0.0555359	KAF6020829.1 CLEC6A [Bugula neritina]
TRINITY_DN290399_c0_g1_i1	0.620627	0.0555359	NXQ59452.1 OST48 glycosyltransferase [Anthoscopus minutus]
TRINITY_DN391979_c0_g1_i1	0.620627	0.0555359	CAG2224908.1 EGT2 [Mytilus edulis]
TRINITY_DN365540_c0_g1_i1	0.620627	0.0555359	WP_152386729.1 DUF1796 family putative cysteine peptidase [Azotobacter salinestris]
TRINITY_DN378245_c0_g1_i1	0.620627	0.0555359	HAY86332.1 alkaline phosphatase family protein [Micrococcus luteus]
TRINITY_DN240616_c0_g1_i1	0.620627	0.0555359	XP_023648931.1 RAD50-interacting protein 1 [Paramormyrops kingsleyae]
TRINITY_DN306776_c0_g1_i1	0.620627	0.0555359	CAG2196423.1 ATG4 [Mytilus edulis]
TRINITY_DN251625_c0_g1_i1	0.620627	0.0555359	VDI07190.1 ceramide synthetase [Mytilus galloprovincialis]
TRINITY_DN352273_c0_g1_i1	0.620627	0.0555359	RFP93296.1 RND transporter, partial [Pseudomonas fluorescens]
TRINITY_DN382364_c0_g1_i1	0.620627	0.0555359	XP_002678904.1 uncharacterized protein NAEGRDRAFT_3032, partial [Naegleria gruberi]
TRINITY_DN344861_c0_g1_i1	0.620627	0.0555359	XP_015433161.1 PREDICTED: aldose reductase-like [Dufourea novaeangliae]
TRINITY_DN229061_c0_g1_i1	0.620627	0.0555359	VDI49418.1 abnormal spindle-like microcephaly-associated protein [Mytilus galloprovincialis]
TRINITY_DN347838_c0_g1_i1	0.620627	0.0555359	WP_119709381.1 alanine dehydrogenase [Bacillus sp. Y1]
TRINITY_DN394553_c0_g1_i1	0.620627	0.0555359	XP_003659614.1 uncharacterized protein MYCTH_2313790 [Thermothelomyces thermophilus ATCC 42464]
TRINITY_DN393075_c0_g1_i1	0.620627	0.0555359	CAC5424216.1 NPFFR2 [Mytilus coruscus]
TRINITY_DN241911_c0_g1_i1	0.620627	0.0555359	VDI34984.1 tight junction protein 1 [Mytilus galloprovincialis]
TRINITY_DN54379_c0_g1_i2	0.620627	0.0555359	CAC5412659.1 Putative ankyrin repeat protein L93 [Mytilus coruscus]
TRINITY_DN300310_c0_g1_i1	0.620627	0.0555359	ECF7008183.1 S1 RNA-binding domain-containing protein [Salmonella enterica subsp. enterica]
TRINITY_DN225974_c0_g2_i1	0.620627	0.0555359	O97484.1 RecName: Full=Histone H2B [Moneuplotes crassus]
TRINITY_DN374014_c0_g1_i1	0.620627	0.0555359	AGJ74540.1 large subunit ribosomal protein 2, partial [Pristionchus bucculentus]
TRINITY_DN299850_c0_g1_i1	0.620627	0.0555359	XP_028129104.1 tetratricopeptide repeat protein 4 [Diabrotica virgifera virgifera]
TRINITY_DN388634_c0_g1_i1	0.620627	0.0555359	XP_043225256.1 casein kinase I-like, partial [Amphibalanus amphitrite]
TRINITY_DN284691_c0_g1_i1	0.620627	0.0555359	CAC5392307.1 Fibrinogen-like protein A,Ryncolin-4,Angiopoietin-related protein 7,Angiopoietin-related protein 1,Ficolin-1-B,Ficolin-2,Ryncolin-1,Fibrinogen-like protein 1,Ficolin-1,Tenascin-X,Tenascin-N,Ryncolin-3,Fibroleukin,Fibrinogen C domain-containing protein 1,Ryncolin-2,Techylectin-5B,Fibrinogen alpha chain,Ficolin-1-A,Tenascin,Angiopoietin-4 [Mytilus coruscus]
TRINITY_DN279576_c0_g1_i1	0.620627	0.0555359	NQW36081.1 adenosylhomocysteinase [Flavobacteriales bacterium]
TRINITY_DN44286_c1_g1_i1	0.620627	0.0555359	CAC5380852.1 BIRC2_3 [Mytilus coruscus]
TRINITY_DN205423_c0_g3_i1	0.620627	0.0555359	VDI22515.1 neural cell adhesion molecule [Mytilus galloprovincialis]
TRINITY_DN388254_c0_g1_i1	0.620627	0.0555359	NQY94874.1 coproporphyrinogen III oxidase [Campylobacteraceae bacterium]
TRINITY_DN178559_c0_g1_i1	0.620627	0.0555359	CAG2239399.1 Receptor-type tyrosine-protein phosphatase beta,Tyrosine-protein phosphatase non-receptor type 11,Tyrosine-protein phosphatase non-receptor type 2,Receptor-type tyrosine-protein phosphatase eta [Mytilus edulis]
TRINITY_DN246120_c0_g1_i1	0.620627	0.0555359	WP_180337641.1 endonuclease/exonuclease/phosphatase family protein, partial [Bathymodiolus brooksi thiotrophic gill symbiont]
TRINITY_DN321148_c0_g1_i1	0.620627	0.0555359	KAF6041250.1 HACL1 [Bugula neritina]
TRINITY_DN99693_c2_g2_i1	0.620627	0.0555359	SHE22011.1 Exodeoxyribonuclease III [Bathymodiolus brooksi thiotrophic gill symbiont]
TRINITY_DN343018_c0_g1_i1	0.620627	0.0555359	NRR33245.1 NAD(P)/FAD-dependent oxidoreductase [Oxalobacteraceae bacterium]
TRINITY_DN362185_c0_g1_i1	0.620627	0.0555359	PHJ22022.1 myosin a [Cystoisospora suis]
TRINITY_DN318988_c0_g1_i1	0.620627	0.0555359	CAC5383184.1 XRCC5 [Mytilus coruscus]
TRINITY_DN80158_c1_g1_i1	0.620627	0.0555359	CAG2196456.1 NEUR [Mytilus edulis]
TRINITY_DN352524_c0_g1_i1	0.620627	0.0555359	RNF24260.1 mitochondrial heat shock, partial [Trypanosoma cruzi]
TRINITY_DN310550_c0_g1_i1	0.620627	0.0555359	XP_004031815.1 rab gdp dissociation inhibitor, putative [Ichthyophthirius multifiliis]
TRINITY_DN326360_c0_g1_i1	0.620627	0.0555359	CAG2190187.1 PTHR1 [Mytilus edulis]
TRINITY_DN376113_c0_g1_i1	0.620627	0.0555359	KYQ92648.1 uridine kinase [Tieghemostelium lacteum]
TRINITY_DN312496_c0_g1_i1	0.620627	0.0555359	XP_044541496.1 uncharacterized protein C9374_014716 [Naegleria lovaniensis]
TRINITY_DN187017_c0_g2_i2	0.620627	0.0555359	CAG2229936.1 NID [Mytilus edulis]
TRINITY_DN316786_c0_g1_i1	0.620627	0.0555359	BAE97403.1 mitochondrial creatine kinase [Dendronephthya gigantea]
TRINITY_DN294649_c0_g1_i1	0.620627	0.0555359	AGB89304.1 nucleolar cysteine-rich protein, partial [Eulia ministrana]
TRINITY_DN360709_c0_g1_i1	0.620627	0.0555359	RXN36364.1 Retrovirus-related Pol polyprotein from transposon 412 [Labeo rohita]
TRINITY_DN335510_c0_g1_i1	0.620627	0.0555359	KAF6032543.1 TMEM86A [Bugula neritina]
TRINITY_DN288927_c0_g1_i1	0.620627	0.0555359	CAG2242090.1 TRIM56 [Mytilus edulis]
TRINITY_DN28024_c3_g1_i1	0.620627	0.0555359	CAG2189110.1 TRIM66 [Mytilus edulis]
TRINITY_DN382416_c0_g1_i1	0.620627	0.0555359	XP_014786476.1 PREDICTED: 60S ribosomal protein L17-like [Octopus bimaculoides]
TRINITY_DN327540_c0_g1_i1	0.620627	0.0555359	ESS69157.1 succinate dehydrogenase cytochrome B subunit [Trypanosoma cruzi Dm28c]
TRINITY_DN347523_c0_g1_i1	0.620627	0.0555359	XP_020897434.1 40S ribosomal protein S15 [Exaiptasia diaphana]
TRINITY_DN304438_c0_g1_i1	0.620627	0.0555359	VDI46782.1 hexosaminidase [Mytilus galloprovincialis]
TRINITY_DN377857_c0_g1_i1	0.620627	0.0555359	GDY12602.1 sialic acid synthase [Planctomycetes bacterium]
TRINITY_DN364848_c0_g1_i1	0.620627	0.0555359	XP_039255585.1 cysteine-rich motor neuron 1 protein-like [Styela clava]
TRINITY_DN310662_c0_g1_i1	0.620627	0.0555359	CAC5406114.1 SUPT6H [Mytilus coruscus]
TRINITY_DN278811_c0_g1_i1	0.620627	0.0555359	CAC5356599.1 OBSCN [Mytilus coruscus]
TRINITY_DN391897_c0_g1_i1	0.620627	0.0555359	VDI45469.1 NADH dehydrogenase (ubiquinone) Fe-S protein 2 [Mytilus galloprovincialis]
TRINITY_DN318150_c0_g1_i1	0.620627	0.0555359	WP_158492296.1 polysaccharide deacetylase [Micrococcus luteus]
TRINITY_DN126363_c0_g1_i1	0.620627	0.0555359	P11503.2 RecName: Full=Heat shock 70 kDa protein; Short=HSP70 [Onchocerca volvulus]
TRINITY_DN277849_c0_g1_i1	0.620627	0.0555359	CAG2237885.1 Protein unc-87,Calponin homolog OV9M [Mytilus edulis]
TRINITY_DN314317_c0_g1_i1	0.620627	0.0555359	PRP54178.1 transcription-repair coupling factor, partial [Bacillus halotolerans]
TRINITY_DN295286_c0_g1_i1	0.620627	0.0555359	CAG2197162.1 NUP49 [Mytilus edulis]
TRINITY_DN325438_c0_g1_i1	0.620627	0.0555359	BAR61846.1 cold shock protein [Bradyrhizobium diazoefficiens]
TRINITY_DN382831_c0_g1_i1	0.620627	0.0555359	VDI55922.1 two pore calcium channel protein 1 [Mytilus galloprovincialis]
TRINITY_DN109928_c0_g2_i1	0.620627	0.0555359	VDI44029.1 myeloid differentiation primary response protein MyD88, partial [Mytilus galloprovincialis]
TRINITY_DN390124_c0_g1_i1	0.620627	0.0555359	KAH7725415.1 Plastin-1 [Aphelenchus avenae]
TRINITY_DN307951_c0_g1_i1	0.620627	0.0555359	WP_202763774.1 reverse transcriptase family protein, partial [Bathymodiolus brooksi thiotrophic gill symbiont]
TRINITY_DN252553_c0_g1_i1	0.620627	0.0555359	CAC5386685.1 SULT6B1 [Mytilus coruscus]
TRINITY_DN291655_c0_g1_i1	0.620627	0.0555359	WP_127966056.1 ribbon-helix-helix domain-containing protein [Agrobacterium sp. RS6]
TRINITY_DN304241_c0_g1_i1	0.620627	0.0555359	WP_054312533.1 response regulator [Mesorhizobium sp. 1M-11]
TRINITY_DN150493_c1_g1_i1	0.620627	0.0555359	WP_202763774.1 reverse transcriptase family protein, partial [Bathymodiolus brooksi thiotrophic gill symbiont]
TRINITY_DN52353_c0_g2_i2	0.620627	0.0555359	CAG2247932.1 FURIN [Mytilus edulis]
TRINITY_DN41088_c0_g1_i1	0.620627	0.0555359	CAG2190105.1 PTCD1 [Mytilus edulis]
TRINITY_DN317268_c0_g1_i1	0.620627	0.0555359	EPY19912.1 large subunit ribosomal protein L5e [Strigomonas culicis]
TRINITY_DN380784_c0_g1_i1	0.620627	0.0555359	CAG2214639.1 FASN [Mytilus edulis]
TRINITY_DN369476_c0_g1_i1	0.620627	0.0555359	VDH90311.1 toll-like receptor 13 [Mytilus galloprovincialis]
TRINITY_DN386309_c0_g1_i1	0.620627	0.0555359	RZB21038.1 MFS transporter [Micrococcus luteus]
TRINITY_DN157090_c0_g1_i1	0.620627	0.0555359	VDI44030.1 myeloid differentiation primary response protein MyD88, partial [Mytilus galloprovincialis]
TRINITY_DN282872_c1_g1_i1	0.620627	0.0555359	CAG2228212.1 Tenascin-R,Ryncolin-2,Ficolin-3,Ficolin-1-A,Ryncolin-1,Fibrinogen C domain-containing protein 1,Tenascin-N,Fibroleukin,Tenascin,Ficolin-1,Fibrinogen-likeprotein A,Ryncolin-3 [Mytilus edulis]
TRINITY_DN278524_c0_g1_i1	0.620627	0.0555359	XP_038077310.1 uncharacterized protein LOC119745157 [Patiria miniata]
TRINITY_DN252447_c0_g1_i1	0.620627	0.0555359	MSZ55379.1 adenosylhomocysteinase [Actinomycetia bacterium]
TRINITY_DN359332_c0_g1_i1	0.620627	0.0555359	KAH9848285.1 60S ribosomal protein L10 [Lenzites betulinus]
TRINITY_DN356264_c0_g1_i1	0.620627	0.0555359	KAF6019599.1 rbpA [Bugula neritina]
TRINITY_DN183863_c0_g1_i1	0.620627	0.0555359	CAG2184802.1 POLD1 [Mytilus edulis]
TRINITY_DN116885_c2_g1_i1	0.620627	0.0555359	VDI34202.1 uncharacterized protein MGAL_10B050263 [Mytilus galloprovincialis]
TRINITY_DN68127_c0_g2_i2	0.620627	0.0555359	KAI2661217.1 Zinc finger BED domain-containing protein 4 [Labeo rohita]
TRINITY_DN290462_c0_g1_i1	0.620627	0.0555359	XP_036355547.1 uncharacterized protein LOC115230414 isoform X2 [Octopus sinensis]
TRINITY_DN381031_c0_g1_i1	0.620627	0.0555359	CAG8575919.1 7230_t:CDS:2 [Paraglomus occultum]
TRINITY_DN301351_c0_g1_i1	0.620627	0.0555359	CDW89893.1 calcium-translocating p-type pmca-type family protein [Stylonychia lemnae]
TRINITY_DN1375_c9_g1_i1	0.620627	0.0555359	CAG2236942.1 ADGRB1 [Mytilus edulis]
TRINITY_DN133956_c0_g1_i1	0.620627	0.0555359	VDI26385.1 autophagy-related protein 2, partial [Mytilus galloprovincialis]
TRINITY_DN324734_c0_g1_i1	0.620627	0.0555359	WP_055753786.1 acyl-CoA dehydrogenase [Brevundimonas sp. Leaf280]
TRINITY_DN300218_c0_g1_i1	0.620627	0.0555359	CAC5374791.1 TMEM63 [Mytilus coruscus]
TRINITY_DN81086_c0_g1_i1	0.620627	0.0555359	CAC5368065.1 SAMHD1 [Mytilus coruscus]
TRINITY_DN391755_c0_g1_i1	0.620627	0.0555359	PSD09496.1 transporter, partial [Stenotrophomonas maltophilia]
TRINITY_DN238996_c0_g2_i1	0.620627	0.0555359	YP_009010565.1 immune reactive putative protease inhibitor [Invertebrate iridovirus 25]
TRINITY_DN341025_c0_g1_i1	0.620627	0.0555359	CDW86052.1 histone h2a deubiquitinase mysm1 [Stylonychia lemnae]
TRINITY_DN161406_c0_g1_i1	0.620627	0.0555359	CAG2205587.1 HIVEP [Mytilus edulis]
TRINITY_DN324272_c0_g1_i1	0.620627	0.0555359	RJT22998.1 PQQ-dependent dehydrogenase, methanol/ethanol family [Aestuariisphingobium litorale]
TRINITY_DN292055_c0_g1_i1	0.620627	0.0555359	NOR86785.1 HYR domain-containing protein [Bacteroidales bacterium]
TRINITY_DN289653_c0_g1_i1	0.620627	0.0555359	VDI14985.1 arylesterase / paraoxonase [Mytilus galloprovincialis]
TRINITY_DN360866_c0_g1_i1	0.620627	0.0555359	PRP75834.1 WD repeat-containing protein 70-like [Planoprotostelium fungivorum]
TRINITY_DN375780_c0_g1_i1	0.620627	0.0555359	MBV9881715.1 4-oxalomesaconate tautomerase [Sphingomonadaceae bacterium]
TRINITY_DN365512_c0_g1_i1	0.620627	0.0555359	CAG2193946.1 LIPA [Mytilus edulis]
TRINITY_DN333056_c0_g1_i1	0.620627	0.0555359	MCC7525797.1 neutral/alkaline non-lysosomal ceramidase N-terminal domain-containing protein [Chitinophagaceae bacterium]
TRINITY_DN56205_c3_g1_i1	0.620627	0.0555359	CAG2217730.1 CDC37 [Mytilus edulis]
TRINITY_DN374733_c0_g1_i1	0.620627	0.0555359	CAG2206016.1 HIP14 [Mytilus edulis]
TRINITY_DN127569_c0_g1_i1	0.620627	0.0555359	OPL07210.1 tonsoku-like protein, partial [Mytilus galloprovincialis]
TRINITY_DN334493_c0_g1_i1	0.620627	0.0555359	CAG2205077.1 E2.2.1.1 [Mytilus edulis]
TRINITY_DN352978_c0_g1_i1	0.620627	0.0555359	ACV04917.1 vasa-like protein, partial [Perna canaliculus]
TRINITY_DN86723_c0_g1_i1	0.620627	0.0555359	OPL33367.1 receptor-type t tyrosine-protein phosphatase, partial [Mytilus galloprovincialis]
TRINITY_DN299738_c0_g1_i1	0.620627	0.0555359	CAC5397798.1 SNRK [Mytilus coruscus]
TRINITY_DN154219_c0_g1_i1	0.620627	0.0555359	VDI55120.1 helicase MOV-10 [Mytilus galloprovincialis]
TRINITY_DN127676_c1_g1_i1	0.620627	0.0555359	CAG2204927.1 ACO [Mytilus edulis]
TRINITY_DN313673_c0_g1_i1	0.620627	0.0555359	CAC5357739.1 CNTN6 [Mytilus coruscus]
TRINITY_DN306660_c0_g1_i1	0.620627	0.0555359	CAC5394652.1 TROVE2 [Mytilus coruscus]
TRINITY_DN395203_c0_g1_i1	0.620627	0.0555359	WP_228546707.1 DUF1725 domain-containing protein [Pseudomonas aeruginosa]
TRINITY_DN320252_c0_g1_i1	0.620627	0.0555359	XP_002293613.1 predicted protein, partial [Thalassiosira pseudonana CCMP1335]
TRINITY_DN364699_c0_g1_i1	0.620627	0.0555359	MBI1920862.1 asparagine--tRNA ligase [Geobacter sp.]
TRINITY_DN181364_c0_g1_i2	0.620627	0.0555359	CAG2197184.1 CREBBP [Mytilus edulis]
TRINITY_DN270704_c0_g1_i1	0.620627	0.0555359	CAC5373917.1 PARP10_14_15 [Mytilus coruscus]
TRINITY_DN177367_c3_g1_i1	0.620627	0.0555359	CAG2221692.1 Thioredoxin domain-containing protein 3,Thioredoxin domain-containing protein 3 homolog [Mytilus edulis]
TRINITY_DN307584_c0_g1_i1	0.620627	0.0555359	XP_004993800.1 uncharacterized protein PTSG_05222 [Salpingoeca rosetta]
TRINITY_DN378459_c0_g1_i1	0.620627	0.0555359	MBN9324820.1 cell division protein ZapE [Delftia acidovorans]
TRINITY_DN154710_c3_g1_i1	0.620627	0.0555359	VDI42961.1 serine/threonine-protein phosphatase 6 regulatory ankyrin repeat subunit A [Mytilus galloprovincialis]
TRINITY_DN385066_c0_g1_i1	0.620627	0.0555359	CAC5398469.1 SH3BP2 [Mytilus coruscus]
TRINITY_DN318877_c0_g1_i1	0.620627	0.0555359	CAC5363573.1 COPZ [Mytilus coruscus]
TRINITY_DN241676_c0_g2_i1	0.620627	0.0555359	VDI05598.1 ATP-dependent DNA helicase PIF1 [Mytilus galloprovincialis]
TRINITY_DN394060_c0_g1_i1	0.620627	0.0555359	XP_034507082.1 60S ribosomal protein L22-3-like [Ailuropoda melanoleuca]
TRINITY_DN252422_c0_g1_i1	0.620627	0.0555359	XP_011543718.1 putative membrane-spanning 4-domains subfamily A member 4E isoform X1 [Homo sapiens]
TRINITY_DN326339_c0_g1_i1	0.620627	0.0555359	CDW85661.1 UNKNOWN [Stylonychia lemnae]
TRINITY_DN344852_c0_g1_i1	0.620627	0.0555359	EPY25064.1 kinesin [Angomonas deanei]
TRINITY_DN333487_c0_g1_i1	0.620627	0.0555359	VDI32630.1 epidermal growth factor receptor kinase substrate 8 [Mytilus galloprovincialis]
TRINITY_DN312968_c0_g1_i1	0.620627	0.0555359	XP_008562482.1 PREDICTED: phosphoribosyltransferase domain-containing protein 1-like [Galeopterus variegatus]
TRINITY_DN314416_c0_g1_i1	0.620627	0.0555359	CAC87029.1 gelsolin [Suberites domuncula]
TRINITY_DN73299_c1_g1_i1	0.620627	0.0555359	CAC5399662.1 TOR1 [Mytilus coruscus]
TRINITY_DN319976_c0_g1_i1	0.620627	0.0555359	XP_039254375.1 uncharacterized protein LOC120331370 [Styela clava]
TRINITY_DN306740_c0_g1_i1	0.620627	0.0555359	CAC5388336.1 TRAF3IP2 [Mytilus coruscus]
TRINITY_DN383238_c0_g1_i1	0.620627	0.0555359	XP_033759174.1 phospholipid scramblase 2-like [Pecten maximus]
TRINITY_DN102203_c0_g1_i1	0.620627	0.0555359	CAG2254674.1 COG5 [Mytilus edulis]
TRINITY_DN325587_c0_g1_i1	0.620627	0.0555359	VDI36800.1 deleted in malignant brain tumors 1 protein [Mytilus galloprovincialis]
TRINITY_DN328108_c0_g1_i1	0.620627	0.0555359	AAF61488.1 low density lipoprotein receptor-related protein 2 LRP2, partial [Mus musculus]
TRINITY_DN206121_c0_g1_i1	0.620627	0.0555359	CAC5379989.1 FBXL4 [Mytilus coruscus]
TRINITY_DN273389_c0_g1_i1	0.620627	0.0555359	CUX54224.1 3-Carboxy-Cis,Cis-Muconate Lactonizing Enzyme [Agrobacterium genomosp. 13 str. CFBP 6927]
TRINITY_DN365283_c0_g1_i1	0.620627	0.0555359	EDO38806.1 predicted protein, partial [Nematostella vectensis]
TRINITY_DN352927_c0_g1_i1	0.620627	0.0555359	XP_028395875.1 ubiquitin-like protein FUBI [Dendronephthya gigantea]
TRINITY_DN344873_c0_g1_i1	0.620627	0.0555359	KAF6032440.1 ATP1A1 [Bugula neritina]
TRINITY_DN286886_c0_g1_i1	0.620627	0.0555359	XP_032222379.1 uncharacterized protein LOC116604300 [Nematostella vectensis]
TRINITY_DN312914_c0_g1_i1	0.620627	0.0555359	MCA3771447.1 MFS transporter [Cutibacterium sp.]
TRINITY_DN105152_c1_g1_i1	0.620627	0.0555359	GFY22576.1 transposable element Tcb2 transposase [Trichonephila clavipes]
TRINITY_DN287824_c0_g1_i1	0.620627	0.0555359	KAF6022593.1 CSDE1 [Bugula neritina]
TRINITY_DN355750_c0_g1_i1	0.620627	0.0555359	KAH7725437.1 CBN-SRF-3 protein [Aphelenchus avenae]
TRINITY_DN149692_c0_g1_i1	0.620627	0.0555359	VDI12955.1 low-density lipoprotein receptor-related protein 1B [Mytilus galloprovincialis]
TRINITY_DN294953_c0_g1_i1	0.620627	0.0555359	CDW81505.1 exportin-t [Stylonychia lemnae]
TRINITY_DN323338_c0_g1_i1	0.620627	0.0555359	WP_032973545.1 proprotein convertase P-domain-containing protein, partial [Stenotrophomonas maltophilia]
TRINITY_DN318140_c0_g1_i1	0.620627	0.0555359	CDW81972.1 luminal binding protein [Stylonychia lemnae]
TRINITY_DN383983_c0_g1_i1	0.620627	0.0555359	WP_239530860.1 RNA methyltransferase [Brevibacterium paucivorans]
TRINITY_DN362395_c0_g1_i1	0.620627	0.0555359	KAG7174813.1 Chorion peroxidase-like 9 [Homarus americanus]
TRINITY_DN358112_c0_g1_i1	0.620627	0.0555359	AOR07019.1 alcohol dehydrogenase class-3-like protein [Saccoglossus kowalevskii]
TRINITY_DN332699_c0_g1_i1	0.620627	0.0555359	PHJ24656.1 beta-hydroxyacyl-acyl carrier protein dehydratase [Cystoisospora suis]
TRINITY_DN151792_c0_g1_i2	0.620627	0.0555359	CAG2224276.1 BTBD3_6 [Mytilus edulis]
TRINITY_DN352348_c0_g1_i1	0.620627	0.0555359	CDW82367.1 dynein heavy chain family protein [Stylonychia lemnae]
TRINITY_DN200815_c1_g1_i1	0.620627	0.0555359	CAC5395253.1 Adhesive plaque matrix protein 2 [Mytilus coruscus]
TRINITY_DN182007_c0_g1_i2	0.620627	0.0555359	EAW60320.1 ribosomal protein L3, isoform CRA_i [Homo sapiens]
TRINITY_DN288064_c0_g1_i1	0.620627	0.0555359	CAG2190319.1 AMT [Mytilus edulis]
TRINITY_DN350628_c0_g1_i1	0.620627	0.0555359	AAR14888.2 three domain flagellar creatine kinase [Chaetopterus variopedatus]
TRINITY_DN329684_c0_g1_i1	0.620627	0.0555359	KAF6026926.1 SUCLG2 [Bugula neritina]
TRINITY_DN315064_c0_g1_i1	0.620627	0.0555359	ABX44791.1 putative 40S ribosomal protein RPS18 [Flustra foliacea]
TRINITY_DN333496_c0_g1_i1	0.620627	0.0555359	KAF6032606.1 ARHGAP15 [Bugula neritina]
TRINITY_DN333864_c0_g1_i1	0.620627	0.0555359	EFF3676311.1 YebC/PmpR family DNA-binding transcriptional regulator [Escherichia coli]
TRINITY_DN373786_c0_g1_i1	0.620627	0.0555359	WP_039603569.1 D-amino acid dehydrogenase, partial [Pseudomonas putida]
TRINITY_DN389912_c0_g1_i1	0.620627	0.0555359	CDW89714.1 UNKNOWN [Stylonychia lemnae]
TRINITY_DN291524_c0_g1_i1	0.620627	0.0555359	CAG2196288.1 RRP8 [Mytilus edulis]
TRINITY_DN365448_c0_g1_i1	0.620627	0.0555359	MBE5726219.1 intronic protein 259 [Nipus sp. C41]
TRINITY_DN222396_c0_g1_i1	0.620627	0.0555359	VDI41954.1 ATP-dependent RNA helicase DHX8/PRP22 [Mytilus galloprovincialis]
TRINITY_DN394470_c0_g1_i1	0.620627	0.0555359	XP_039274711.1 uncharacterized protein LOC120348616 [Styela clava]
TRINITY_DN305982_c0_g1_i1	0.620627	0.0555359	XP_009270205.1 60S ribosomal protein L4-B [Wallemia ichthyophaga EXF-994]
TRINITY_DN328991_c0_g1_i1	0.620627	0.0555359	WP_020193136.1 M24 family metallopeptidase, partial [Pseudomonas putida]
TRINITY_DN254201_c0_g1_i1	0.620627	0.0555359	CAG2236443.1 TDO2 [Mytilus edulis]
TRINITY_DN315406_c0_g1_i1	0.620627	0.0555359	WP_200968705.1 amidohydrolase family protein [Micrococcus luteus]
TRINITY_DN286528_c0_g1_i1	0.620627	0.0555359	KHN73577.1 Influenza virus NS1A-binding -like protein [Toxocara canis]
TRINITY_DN394434_c0_g1_i1	0.620627	0.0555359	KAG7164818.1 Electron transfer flavoprotein-ubiquinone oxidoreductase-like [Homarus americanus]
TRINITY_DN312995_c0_g1_i1	0.620627	0.0555359	AHN10827.1 DszA/NtaA-like monooxygenase, partial [Micrococcus luteus]
TRINITY_DN300234_c0_g1_i1	0.620627	0.0555359	KAF6020104.1 VWA3B [Bugula neritina]
TRINITY_DN232426_c0_g1_i1	0.620627	0.0555359	CAG2257127.1 SAMHD1 [Mytilus edulis]
TRINITY_DN204170_c0_g1_i2	0.620627	0.0555359	GAA37562.1 barrier-to-autointegration factor [Clonorchis sinensis]
TRINITY_DN344205_c0_g1_i1	0.620627	0.0555359	KKK08054.1 chemotaxis protein, partial [Pseudomonas putida SJ3]
TRINITY_DN324713_c0_g1_i1	0.620627	0.0555359	CAE6967797.1 GATM [Symbiodinium natans]
TRINITY_DN320198_c0_g1_i1	0.620627	0.0555359	CAG2198671.1 C1QTNF1_6_8 [Mytilus edulis]
TRINITY_DN63191_c0_g2_i1	0.620627	0.0555359	VDI26880.1 leucine-rich repeat and coiled-coil domain-containing protein 1 [Mytilus galloprovincialis]
TRINITY_DN300001_c0_g1_i1	0.620627	0.0555359	XP_029814268.1 CD63 antigen, partial [Manacus vitellinus]
TRINITY_DN221479_c0_g1_i1	0.620627	0.0555359	CAC5424067.1 ATG2 [Mytilus coruscus]
TRINITY_DN341832_c0_g1_i1	0.620627	0.0555359	VDI37224.1 myosin heavy chain [Mytilus galloprovincialis]
TRINITY_DN382304_c0_g1_i1	0.620627	0.0555359	MBX9724270.1 50S ribosomal protein L15e [Candidatus Obscuribacterales bacterium]
TRINITY_DN285074_c0_g1_i1	0.620627	0.0555359	VDI34473.1 coiled-coil and C2 domain-containing protein 1 [Mytilus galloprovincialis]
TRINITY_DN377600_c0_g1_i1	0.620627	0.0555359	CAG2189537.1 TRIM71 [Mytilus edulis]
TRINITY_DN380552_c0_g1_i1	0.620627	0.0555359	VUP07815.1 Sensory/regulatory protein RpfC [Stenotrophomonas maltophilia]
TRINITY_DN366843_c0_g1_i1	0.620627	0.0555359	CDS12340.1 Putative Cytochrome c [Lichtheimia ramosa]
TRINITY_DN268625_c0_g1_i1	0.620627	0.0555359	CAC5363386.1 MRC [Mytilus coruscus]
TRINITY_DN39475_c0_g2_i1	0.620627	0.0555359	CAG2207954.1 BTBD3_6 [Mytilus edulis]
TRINITY_DN328132_c0_g1_i1	0.620627	0.0555359	ONG40685.1 peptidoglycan-associated lipoprotein [Enhydrobacter sp. H5]
TRINITY_DN342010_c0_g1_i1	0.620627	0.0555359	VDI01453.1 histidine triad (HIT) family protein [Mytilus galloprovincialis]
TRINITY_DN133789_c0_g1_i1	0.620627	0.0555359	VDI09310.1 21S rRNA (GM2251-2'-O)-methyltransferase [Mytilus galloprovincialis]
TRINITY_DN335816_c0_g1_i1	0.620627	0.0555359	OCZ72846.1 amino acid ABC transporter permease, partial [Achromobacter xylosoxidans]
TRINITY_DN392813_c0_g1_i1	0.620627	0.0555359	WP_016711116.1 MULTISPECIES: heme-binding protein [Pseudomonas]
TRINITY_DN361944_c0_g1_i1	0.620627	0.0555359	KXJ21394.1 Zinc transporter ZIP14 [Exaiptasia diaphana]
TRINITY_DN78059_c0_g1_i1	0.620627	0.0555359	CAG2202892.1 AMPH [Mytilus edulis]
TRINITY_DN269342_c0_g1_i1	0.620627	0.0555359	VDI54592.1 ATP-dependent DNA helicase RecQ [Mytilus galloprovincialis]
TRINITY_DN359807_c0_g1_i1	0.620627	0.0555359	WP_145120192.1 MFS transporter [Sphingomonas dokdonensis]
TRINITY_DN383163_c0_g1_i1	0.620627	0.0555359	VDI04149.1 ATP-binding cassette, subfamily C (CFTR/MRP), member 1 [Mytilus galloprovincialis]
TRINITY_DN300273_c0_g1_i1	0.620627	0.0555359	ABX44790.1 putative 40S ribosomal protein RPS17 [Flustra foliacea]
TRINITY_DN385313_c0_g1_i1	0.620627	0.0555359	XP_012560932.1 glycine-rich RNA-binding protein 10 [Hydra vulgaris]
TRINITY_DN384759_c0_g1_i1	0.620627	0.0555359	XP_001747906.1 uncharacterized protein MONBRDRAFT_38079 [Monosiga brevicollis MX1]
TRINITY_DN391845_c0_g1_i1	0.620627	0.0555359	MBP8938331.1 ABC transporter ATP-binding protein [Agrobacterium sp.]
TRINITY_DN353336_c0_g1_i1	0.620627	0.0555359	XP_013404649.1 regulation of enolase protein 1 isoform X2 [Lingula anatina]
TRINITY_DN376342_c0_g1_i1	0.620627	0.0555359	CAC5421247.1 CCT8 [Mytilus coruscus]
TRINITY_DN303461_c0_g1_i1	0.620627	0.0555359	ADQ73946.1 cathepsin L [Paralithodes camtschaticus]
TRINITY_DN387241_c0_g1_i1	0.620627	0.0555359	CAC5391934.1 MCM8 [Mytilus coruscus]
TRINITY_DN212745_c0_g6_i1	0.620627	0.0555359	XP_022104821.1 ubiquitin-40S ribosomal protein S27a [Acanthaster planci]
TRINITY_DN339412_c0_g1_i1	0.620627	0.0555359	CAG2232130.1 NDUFV1 [Mytilus edulis]
TRINITY_DN336201_c0_g1_i1	0.620627	0.0555359	AFD29605.1 EZH [Schmidtea mediterranea]
TRINITY_DN302216_c0_g1_i1	0.620627	0.0555359	CAC5386879.1 AUB [Mytilus coruscus]
TRINITY_DN331598_c0_g1_i1	0.620627	0.0555359	CAG2193880.1 TMPRSS11E [Mytilus edulis]
TRINITY_DN365710_c0_g1_i1	0.620627	0.0555359	XP_024507392.1 Cytochrome c oxidase subunit Vb [Strongyloides ratti]
TRINITY_DN287305_c0_g1_i1	0.620627	0.0555359	CAC12741.1 intermediate filament protein [Glottidia pyramidata]
TRINITY_DN351964_c0_g1_i1	0.620627	0.0555359	KAF6036684.1 CHDC2 [Bugula neritina]
TRINITY_DN194455_c0_g1_i2	0.620627	0.0555359	VDI77928.1 synaptotagmin-14/16 [Mytilus galloprovincialis]
TRINITY_DN393822_c0_g1_i1	0.620627	0.0555359	WP_180337589.1 reverse transcriptase domain-containing protein, partial [Bathymodiolus brooksi thiotrophic gill symbiont]
TRINITY_DN332672_c0_g1_i1	0.620627	0.0555359	KAF7243054.1 ATP-binding cassette sub-family A member 3 [Varanus komodoensis]
TRINITY_DN356025_c0_g1_i1	0.620627	0.0555359	ETO01351.1 NADPH-cytochrome-P450 oxidoreductase [Reticulomyxa filosa]
TRINITY_DN394291_c0_g1_i1	0.620627	0.0555359	CCC94184.1 putative 60S ribosomal protein L6 [Trypanosoma congolense IL3000]
TRINITY_DN358528_c0_g1_i1	0.620627	0.0555359	KAH7414385.1 S-adenosyl-L-homocysteine hydrolase-like protein [Phaeosphaeria sp. MPI-PUGE-AT-0046c]
TRINITY_DN380932_c0_g1_i1	0.620627	0.0555359	TFI47638.1 phenylalanine--tRNA ligase subunit beta [Diaphorobacter sp. DS2]
TRINITY_DN334057_c0_g1_i1	0.620627	0.0555359	CAC5414742.1 Fibrinogen-like protein 1,Fibrinogen-like protein A,Tenascin,Ryncolin-2,Ryncolin-4,Fibrinogen C domain-containing protein 1-A,Microfibril-associated glycoprotein 4,Tenascin-N,Fibroleukin,Angiopoietin-related protein 7,Ficolin-2,Ryncolin-1,Tenascin-R,Ryncolin-3,Ficolin-1,Fibrinogen C domain-containing protein 1-B,Fibrinogen C domain-containing protein 1 [Mytilus coruscus]
TRINITY_DN286052_c0_g1_i1	0.620627	0.0555359	XP_045027079.1 histone deacetylase 3 [Daphnia magna]
TRINITY_DN313123_c0_g1_i1	0.620627	0.0555359	ADK90071.1 beta-tubulin, partial [Diplonema papillatum]
TRINITY_DN107657_c0_g1_i1	0.620627	0.0555359	CAG2218607.1 GCP6 [Mytilus edulis]
TRINITY_DN311861_c0_g1_i1	0.620627	0.0555359	WP_210014482.1 sensor domain-containing diguanylate cyclase [Pseudomonas palmensis]
TRINITY_DN327603_c0_g1_i1	0.620627	0.0555359	PZP48919.1 disulfide bond formation protein DsbA [Agrobacterium fabrum]
TRINITY_DN155536_c0_g1_i1	0.620627	0.0555359	CAG2233988.1 G22P2 [Mytilus edulis]
TRINITY_DN297284_c0_g1_i1	0.620627	0.0555359	CAG2241615.1 X-ray radiation resistance-associated protein 1 [Mytilus edulis]
TRINITY_DN109161_c0_g1_i1	0.620627	0.0555359	CAC5374767.1 GPR158 [Mytilus coruscus]
TRINITY_DN7027_c10_g1_i1	0.620627	0.0555359	VDI20100.1 dynein assembly factor 2, axonemal, partial [Mytilus galloprovincialis]
TRINITY_DN392970_c0_g1_i1	0.620627	0.0555359	CAG2247712.1 GTPase IMAP family member 7 [Mytilus edulis]
TRINITY_DN394952_c0_g1_i1	0.620627	0.0555359	XP_013754968.1 40S ribosomal protein S6 [Thecamonas trahens ATCC 50062]
TRINITY_DN386950_c0_g1_i1	0.620627	0.0555359	XP_021343341.1 ER membrane protein complex subunit 3-like [Mizuhopecten yessoensis]
TRINITY_DN298596_c0_g1_i1	0.620627	0.0555359	CAG2191534.1 CRISP [Mytilus edulis]
TRINITY_DN383198_c0_g1_i1	0.620627	0.0555359	KAG0713803.1 EARP-interacting [Chionoecetes opilio]
TRINITY_DN299768_c0_g1_i1	0.620627	0.0555359	CAG2248353.1 ACP7 [Mytilus edulis]
TRINITY_DN301513_c0_g1_i1	0.620627	0.0555359	WP_212375349.1 UDP-N-acetylglucosamine 2-epimerase [Bradyrhizobium japonicum]
TRINITY_DN294788_c0_g1_i1	0.620627	0.0555359	RDD39416.1 Cytochrome b5 domain-containing protein 1 [Trichoplax sp. H2]
TRINITY_DN353231_c0_g1_i1	0.620627	0.0555359	CAG2237365.1 RNF213 [Mytilus edulis]
TRINITY_DN28701_c1_g2_i1	0.620627	0.0555359	CAG2196843.1 C1QL [Mytilus edulis]
TRINITY_DN333602_c0_g1_i1	0.620627	0.0555359	XP_022339741.1 dopamine D2-like receptor [Crassostrea virginica]
TRINITY_DN150356_c0_g2_i1	0.620627	0.0555359	CAG2196337.1 HMCN [Mytilus edulis]
TRINITY_DN77545_c1_g1_i1	0.620627	0.0555359	VDI20100.1 dynein assembly factor 2, axonemal, partial [Mytilus galloprovincialis]
TRINITY_DN355684_c0_g1_i1	0.620627	0.0555359	CDW76614.1 UNKNOWN [Stylonychia lemnae]
TRINITY_DN300495_c0_g1_i1	0.620627	0.0555359	XP_005102734.2 outer dense fiber protein 3 [Aplysia californica]
TRINITY_DN61089_c4_g1_i1	0.620627	0.0555359	CAC5423380.1 CHST9 [Mytilus coruscus]
TRINITY_DN318306_c0_g1_i1	0.620627	0.0555359	OZB32807.1 ABC transporter ATP-binding protein [Pseudomonas sp. 34-62-33]
TRINITY_DN362544_c0_g1_i1	0.620627	0.0555359	KAF6041229.1 Vkr [Bugula neritina]
TRINITY_DN380820_c0_g1_i1	0.620627	0.0555359	NMD47427.1 tetratricopeptide repeat protein [Propionibacterium sp.]
TRINITY_DN358500_c0_g1_i1	0.620627	0.0555359	HBI20297.1 catalase HPII [Brevundimonas sp.]
TRINITY_DN245433_c0_g1_i1	0.620627	0.0555359	KAF6017615.1 PCCB [Bugula neritina]
TRINITY_DN303504_c0_g1_i1	0.620627	0.0555359	WP_102668037.1 MULTISPECIES: ferrochelatase [Pseudomonas]
TRINITY_DN220949_c0_g1_i1	0.620627	0.0555359	XP_010182620.1 PREDICTED: aldehyde dehydrogenase, cytosolic 2, partial [Mesitornis unicolor]
TRINITY_DN311947_c0_g1_i1	0.620627	0.0555359	HAY86975.1 peptidoglycan endopeptidase [Micrococcus luteus]
TRINITY_DN352106_c0_g1_i1	0.620627	0.0555359	VDI54973.1 chondroitin sulfate synthase [Mytilus galloprovincialis]
TRINITY_DN394349_c0_g1_i1	0.620627	0.0555359	KAG1686691.1 Rho-related BTB domain-containing protein 2 [Nymphon striatum]
TRINITY_DN378036_c0_g1_i1	0.620627	0.0555359	KAF1055951.1 C4-dicarboxylate TRAP transporter large permease protein DctM [Delftia tsuruhatensis]
[truncated: 45,633 more rows]
